Phylogeny of the Male-Based Ant Genus *Phaulomyrma*

1     **Synonymization of the male-based ant genus *Phaulomyrma* (Hymenoptera, Formicidae)**  
2                 **with *Leptanilla* based upon Bayesian total-evidence phylogenetic inference**

3                                         Zachary H. Griebenow

4     **Abstract.** Although molecular data have proven indispensable in confidently resolving the  
5     phylogeny of many clades across the tree of life, these data may be inaccessible for certain taxa.  
6     The resolution of taxonomy in the ant subfamily Leptanillinae is made problematic by the  
7     absence of DNA sequence data for leptanilline taxa that are known only from male specimens,  
8     including the monotypic genus *Phaulomyrma* Wheeler & Wheeler. Focusing upon the  
9     considerable diversity of undescribed male leptanilline morphospecies, the phylogeny of 35  
10    putative morphospecies sampled from across the Leptanillinae, plus an outgroup, is inferred from  
11    11 nuclear loci and 41 discrete male morphological characters using a Bayesian total-evidence  
12    framework, with *Phaulomyrma* represented by morphological data only. Based upon the results  
13    of this analysis *Phaulomyrma* is synonymized with *Leptanilla* Emery, and male-based diagnoses  
14    for *Leptanilla* that are grounded in phylogeny are provided, under both broad and narrow  
15    circumscriptions of that genus. This demonstrates the potential utility of a total-evidence  
16    approach in inferring the phylogeny of rare extant taxa for which molecular data are unavailable  
17    and begins a long-overdue systematic revision of the Leptanillinae that is focused on male  
18    material.

19

## Phylogeny of the Male-Based Ant Genus *Phaulomyrma*

### 20 **Introduction**

21 Over the past three decades, DNA sequences have provided great insight into phylogenetic  
22 relationships across the Metazoa, including the insects (Kjer *et al.* 2018). The application of  
23 maximum-likelihood (ML) and Bayesian statistical methods to analysis of genetic data has  
24 robustly resolved many problems that were intractable when using morphological data alone  
25 (e.g. Niehuis *et al.* 2012; Wipfler *et al.* 2019). However, DNA sequences may be unavailable for  
26 some taxa, necessitating the integration of morphological and molecular data under the same  
27 inferential framework. Fossils are the most obvious example of this: these are valuable for  
28 calibration of phylogenies in absolute time under a Bayesian approach, preferably with their  
29 topological position being inferred from the data (Ronquist *et al.* 2012; O'Reilly *et al.* 2015;  
30 Bapst *et al.* 2016; Matzke & Wright 2016). Although the inclusion of fossils for the purposes of  
31 “tip-dating” has received the bulk of attention in Bayesian total-evidence phylogenetic inference,  
32 the lack of molecular data may afflict rare extant taxa as well (Sánchez *et al.* 2016; Robertson &  
33 Moore 2016). This is problematic if the affinities of these taxa are not immediately clear from  
34 morphology alone.

35 The ant subfamily Leptanillinae (Hymenoptera: Formicidae) is an apt test case for methods to  
36 resolve this problem. A group of small, hypogaecic ants largely restricted to the Old World tropics  
37 and subtropics, the Leptanillinae are understood to be one of the earliest-diverging lineages in  
38 the ant crown-group (Rabeling *et al.* 2008; Kück *et al.* 2011; Borowiec *et al.* 2019; Boudinot *et*  
39 *al.* submitted). Three out of eight described genera are known from both workers and males:  
40 *Opamyрма* Yamane, Bui & Eguchi, 2008 (Yamada *et al.* 2020), *Protanilla* Taylor, 1990  
41 (Griebenow, in press), and *Leptanilla* Emery, 1870 (e.g. Ogata *et al.* 1995). Males of  
42 *Anomalomyrma* Taylor, 1990 are unknown. Four leptanilline genera—*Scyphodon* Brues, 1925;



### Phylogeny of the Male-Based Ant Genus *Phaulomyrma*

43 *Phaulomyrma* Wheeler & Wheeler, 1930; *Noonilla* Petersen, 1968; and *Yavnella* Kugler, 1986—  
44 have been described solely from males, as have many species of *Leptanilla* (cf. Bolton 1990).  
45 Recent molecular data indicate that the type species of *Yavnella* and a specimen provisionally  
46 assigned to *Phaulomyrma* are nested within a clade of putative *Leptanilla* morphospecies  
47 (Borowiec *et al.* 2019). Moreover, although *Scyphodon anomalum* Brues, 1925 and *Noonilla*  
48 *copiosa* Petersen, 1968 exhibit bizarre autapomorphies such as hypertrophied mandibles (Brues  
49 1925) and a ventromedian genital “trigger” (Petersen 1968), respectively, these ants are  
50 otherwise similar to males attributed to *Leptanilla* (Boudinot 2015).

51 This indicates a need for a systematic revision of the Leptanillinae, but almost all published  
52 taxonomic studies of the group have been descriptive without recourse to molecular phylogeny,  
53 with the exceptions being revisions to our concept of the subfamily. Multi-locus DNA datasets  
54 demonstrated that the enigmatic Afrotropical genus *Apomyrma* Gotwald, Brown & Lévieux,  
55 1971 is closely related to the Amblyoponinae rather than the Leptanillinae (Brady *et al.* 2006;  
56 Moreau *et al.* 2006), and that the superficially similar Asian genus *Opamyrma* is in fact sister to  
57 the remaining Leptanillinae (Ward & Fisher 2016). None of these studies focused upon the  
58 Leptanillinae or the internal phylogeny of this clade. Such a study must confront two challenges:  
59 first, the lack of DNA sequences for certain critical taxa across the Leptanillinae (e.g.,  
60 *Scyphodon*), which hampers any attempt to confidently resolve relationships among these;  
61 second, the definition of genera based only upon males, which prevents an integrated  
62 phylogenetic classification of the Leptanillinae, since phenotypes of only one sex are considered.

63 The dissociation of leptanilline castes results from collecting bias. Subterranean workers have  
64 been largely collected with *lavage de terre* methodology (López *et al.* 1994; Wong and Guénard  
65 2016), Winkler trapping (Belshaw & Bolton 1994; Leong *et al.* 2018), and subterranean pitfall

## Phylogeny of the Male-Based Ant Genus *Phaulomyrma*

66 traps (Wong & Guénard 2016; Man *et al.* 2017); whereas male leptanillines are typically  
67 collected by sweeping foliage or by deploying Malaise or pan traps (Robertson 2000). None of  
68 these methods are likely to collect males in association with workers, nor is the queen caste often  
69 collected in association with conspecifics. Contrasting with the alate condition observed in most  
70 ants, queens described from the tribe Leptanillini are completely wingless and blind (Emery  
71 1870; Kutter 1948; Masuko 1990; López *et al.* 1994; Ogata *et al.* 1995), meaning that these are  
72 no more likely to be collected than corresponding workers. Queens belonging to other  
73 leptanilline lineages (*Opamyrma* and the Anomalomyrmini) are alate so far as is known (Bolton  
74 1990; Baroni Urbani & de Andrade 2008; Borowiec *et al.* 2011; Chen *et al.* 2017; Hsu *et al.*  
75 2017; Man *et al.* 2017), save for an apparent record of queen polyphenism in an undescribed  
76 *Protanilla* (Billen *et al.* 2013), but are infrequently collected.

77 Therefore, the bulk of known leptanilline diversity, most of it undescribed, is represented by  
78 exclusively male material. In some cases, molecular data are inaccessible for male morphotaxa  
79 due to paucity of suitably recent specimens, obliging a total-evidence approach to infer the  
80 phylogeny of these lineages. This study uses such an approach to resolve the position of the  
81 male-based species *Phaulomyrma javana* Wheeler & Wheeler, 1930, the sole species included in  
82 this genus. Here, the phylogeny of the Leptanillinae is inferred jointly from 10 protein-coding  
83 genes, 28S rDNA, and 41 discrete male morphological characters under a Bayesian statistical  
84 framework. This is the first combined-evidence Bayesian analysis to include the Leptanillinae  
85 and is novel among studies of ant phylogeny in its inclusion of exclusively male morphological  
86 characters (Barden *et al.* [2017] used both worker and male morphology in their Bayesian total-  
87 evidence inference). Despite the absence of nucleotide sequences for *P. javana* a Bayesian total-  
88 evidence approach facilitates the inclusion of this terminal and its confident phylogenetic

## Phylogeny of the Male-Based Ant Genus *Phaulomyrma*

89 placement. Based upon the results of these joint molecular and morphological phylogenetic  
90 analyses, a revised male-based definition of *Leptanilla* is provided, and *Phaulomyrma* is  
91 synonymized with that genus.

### 92 **Materials and Methods**

#### 93 *Taxon Sampling*

94 Thirty-five terminals were included in total (Tables 1-2). Discrete morphological data were  
95 scored for those 33 terminals for which male material was known. *Anomalomyrma boltoni*  
96 Borowiec, Schulz, Alpert & Bañar, 2011 and *Leptanilla revelierii* Emery, 1870 were represented  
97 in this study by workers alone. The latter was included on account of its status as the type species  
98 of that genus: regardless of future systematic revision to the Leptanillinae, the concept of the  
99 genus *Leptanilla* will not exclude this species. DNA sequences for the outgroup *M. heureka* were  
100 obtained from a worker ant, as published in Borowiec *et al.* (2019). Most putative morphospecies  
101 were represented by singletons (Table 1), but phenotypic variation within those morphospecies  
102 for which material was abundant (e.g., *Leptanilla zhg-my02*) is minimal, and so gives no reason  
103 to suspect heterospecificity among the specimens referred to these morphospecies.

104 Representatives of all male-based genera were included in total-evidence analyses, except for  
105 *Scyphodon*. These include both *Yavnella argamani* Kugler, 1986 and *Yavnella cf. indica*, along  
106 with two undescribed *Yavnella* morphospecies from Bhutan and Thailand, respectively;  
107 *Phaulomyrma javana*; and two morphospecies of *Noonilla* identified as such according to the  
108 definition given by Petersen (1968). *Leptanilla* TH02-6 and -08, along with *Phaulomyrma*  
109 MM01, were placed in those genera by Borowiec *et al.* (2019) and/or Boudinot (2015) but are  
110 here identified as *Yavnella* (Table 1) according to the definition of Kugler (1986).

## Phylogeny of the Male-Based Ant Genus *Phaulomyrma*

111 Material is deposited in the following repositories: the Bohart Museum of Entomology,  
112 University of California, Davis, CA, USA (UCDC); the California Academy of Sciences, San  
113 Francisco, CA, USA (CASC); the California State Collection of Arthropods, Sacramento, CA,  
114 USA (CSCA); the Lund Museum of Zoology, Lund, Sweden (MZLU); and the Australian  
115 National Insect Collection, Canberra, Australia (ANIC).

### 116 *Molecular Dataset*

117 Total-evidence phylogenetic inference was based upon 11 nuclear loci: *28S ribosomal DNA*  
118 (*28S*), *abdominal-A (abdA)*, *arginine kinase (argK)*, *antennapedia (Antp)*, *elongation factor 1-*  
119 *alpha F2 copy (EF1 $\alpha$ F2)*, *long wavelength rhodopsin (LW Rh)*, *NaK ATPase (NaK)*, *DNA pol-*  
120 *delta (POLDI)*, *topoisomerase I (TopI)*, *ultrabithorax (Ubx)*, and *wingless (Wg)*. I derived these  
121 “legacy loci” for 19 terminals from the alignment of Borowiec *et al.* (2019) (doi:  
122 10.5281/zenodo.2549806) but expanded to include autapomorphic indels and introns, and  
123 constituting 11,090 bp. Legacy loci for *Leptanilla* GR03 were derived from Ward & Sumnicht  
124 (2012). For further detail on the protocols for the extraction and amplification of these genetic  
125 data, refer to Ward *et al.* (2010) and Ward & Fisher (2016). I added 14 terminals to this “legacy-  
126 locus” intron-inclusive dataset by retrieving orthologous loci from phylogenomic data acquired  
127 with the ultra-conserved element (UCE) probe set *hym-v2* (Branstetter *et al.* 2017). *P. javana*  
128 was the only terminal for which molecular data were not obtained: this species is known only  
129 from two slide-mounted syntypes collected in 1907.

130 DNA was extracted non-destructively using a DNeasy Blood and Tissue Kit (Qiagen Inc.,  
131 Valencia, CA) according to manufacturer instructions. DNA was quantified for each sample with  
132 a Qubit 2.0 fluorometer (Life Technologies Inc., Carlsbad, CA). Phylogenomic data were  
133 obtained from these taxa using the *hym-v2* probe set, with libraries being prepared and target loci

## Phylogeny of the Male-Based Ant Genus *Phaulomyrma*

134 enriched using the protocol of Branstetter *et al.* (2017). Enrichment success and size-adjusted  
135 DNA concentrations of pools were assessed using the SYBR FAST qPCR kit (Kapa Biosystems,  
136 Wilmington, MA) and all pools were combined into an equimolar final pool. The contents of this  
137 final pool were sequenced by an Illumina HiSeq 2500 at the University of Utah's High  
138 Throughput Genomics Facility or an Illumina HiSeq 4000 at Novogene, Sacramento, CA. The  
139 FASTQ output was demultiplexed and cleansed of adapter contamination and low-quality reads  
140 using *illumiprocessor* (Faircloth 2013) in the PHYLUCE package. Raw reads were then  
141 assembled with *trinity* v. 2013-02-25 (Grabherr *et al.* 2011) or SPAdes v. 3.12.0 (Bankevich *et*  
142 *al.* 2013). The possibility of genetic contamination and/or mis-assembly in the UCE samples was  
143 tested by inferring a phylogeny from a concatenated UCE alignment, unpartitioned, using IQ-  
144 Tree 1.6.10 (Nguyen *et al.* 2015) on the CIPRES Science Gateway (v. 3.3) (Miller *et al.* 2010)  
145 with the GTR+G model of substitution for 1,000 ultrafast bootstrap replicates (Hoang *et al.*  
146 2018): this phylogeny was plausible given preliminary hypotheses, providing no positive  
147 evidence of sequence contamination or mis-assembly. Summary statistics for these UCE  
148 assemblies were computed using *statswrapper.sh* in *BBMap* (Bushnell 2014), and provided in  
149 Supplemental Table 1.

150 In the cases of the 14 terminals not included in Ward & Sumnicht (2012) or Borowiec *et al.*  
151 (2019) for which molecular data could be obtained, legacy loci orthologous with those used by  
152 Borowiec *et al.* (2019) were then recovered from genome-scale data as follows using PHYLUCE  
153 (Faircloth 2016). I derived sequences representing each locus for *Leptanilla* GR02 from the  
154 alignment ANT-exon-sequences-40-taxa-reduced.fasta published by Branstetter *et al.* (2017),  
155 given the comparative completeness of the matrix for that species, and its phylogenetic position  
156 nested well within the Leptanillinae. These sequences were then used analogously to probes.

## Phylogeny of the Male-Based Ant Genus *Phaulomyrma*

157 Species-specific contig assemblies were obtained using  
158 *phyluce\_assembly\_match\_contigs\_to\_probes.py* (min\_coverage = 50, min\_identity = 85), a list  
159 of legacy loci shared across all taxa was generated using  
160 *phyluce\_assembly\_get\_match\_counts.py*, and separate FASTA files for each locus were created  
161 using these outputs. Sequences were aligned separately by locus using MAFFT (Katoh *et al.*  
162 2009) implemented with the command *phyluce\_assembly\_seqcap\_align.py*, and these sequences  
163 were then trimmed with Gblocks (Castresana 2000) as implemented by the wrapper script  
164 *phyluce\_assembly\_get\_gblocks\_trimmed\_alignment\_from\_untrimmed.py* (settings: b1 = 0.5, b2  
165 = 0.5, b3 = 12, b4 = 7). Alignment statistics for the output FASTA files were calculated with  
166 *phyluce\_align\_get\_align\_summary\_data.py*. Finally, a matrix that was 80% complete with  
167 respect to locus coverage was generated using the script  
168 *phyluce\_align\_get\_only\_loci\_with\_min\_taxa.py*. This contained 7 out of the 10 protein-coding  
169 loci that I attempted to recover using the exon-based bioinformatic protocol of Branstetter *et al.*  
170 (2017), in addition to 28S rDNA. Legacy loci recovered from UCE assemblies often included  
171 non-coding sequences adjacent to the regions included in Borowiec *et al.* (2019), which were  
172 trimmed manually in AliView. In whichever cases those loci had been recovered, sequences for  
173 the taxa represented only in the dataset of Borowiec *et al.* (2019) were then aligned with the  
174 recovered legacy loci using the online MAFFT interface (Katoh *et al.* 2019) with default settings.  
175 In cases where legacy loci were not successfully recovered or were incomplete relative to  
176 preexisting Sanger-derived sequences, these loci were derived from the datasets of Borowiec *et*  
177 *al.* (2019) or, in the case of *Leptanilla* GR03, Ward & Sumnick (2012). These data were  
178 concatenated with UCE-derived sequences across all FASTA files, inasmuch all sequences for  
179 each morphospecies were derived from the same specimen; and all loci were concatenated to

## Phylogeny of the Male-Based Ant Genus *Phaulomyrma*

180 produce a final alignment, which was 9,351 bp in length. Further summary statistics for this final  
181 alignment are provided in Table 1 and Supplemental Table 2. Alignment was unambiguous once  
182 all loci were brought into their respective reading frames. GenBank accession numbers for all  
183 loci used in this study are provided in Table 2.

184 Those terminals for which loci were obtained using the 11 nuclear loci from *Leptanilla* GR02 as  
185 “probes” according to the modified PHYLUCE protocol cited above (“Molecular Dataset”)  
186 (Faircloth 2016), with 80% locus coverage implemented in  
187 *phyluce\_align\_get\_only\_loci\_with\_min\_taxa.py*, exhibit low coverage relative to those that were  
188 sequenced prior to this study (Table 1). Therefore, a 9,062-bp legacy-locus alignment was  
189 created that includes only those data published prior to this study (Ward & Sumnicht 2012;  
190 Borowiec *et al.* 2019), with 20 terminals. These sequences can be used to test the possibility that  
191 missing data would have an appreciable effect on phylogenetic inference phylogenetic analyses.

### 192 *Morphological Dataset*

193 Forty-one discrete binary morphological characters were coded for all 33 morphospecies known  
194 from males. All these specimens were examined with a Leica MZ75 compound microscope or by  
195 reference to images on AntWeb, except for the male of *M. heureka* and *O. hungvuong*, in the  
196 cases of which observations were derived from Boudinot (2015: Figs. 11-12) and Yamada *et al.*  
197 (2020: Figs. 11-13), respectively, or from the textual descriptions by those authors. I imaged  
198 specimens when necessary using a JVC KY-F75 digital camera and compiled color photographs  
199 from these with the Syncrosopy AutoMontage Program. Scanning electron microscopy was  
200 undertaken using a Hitachi TM4000 tabletop microscope. Morphological terminology follows  
201 the Hymenoptera Anatomy Ontology (Yoder *et al.* 2010), with some exceptions being derived  
202 from Bolton (2003) and Boudinot (2018). The character coding scheme was binary and non-



## Phylogeny of the Male-Based Ant Genus *Phaulomyrma*

203 additive (Pleijel 1995). Missing data were scored as ‘?’. Autapomorphic characters were  
204 included. Numerical scores for all morphological characters are presented in the Supplemental  
205 Table 3.

206 Non-additive binary coding has been criticized for its susceptibility to redundancy (Strong &  
207 Lipscomb 1999), stipulation of compound characters, and the inadvertent conflation of  
208 morphological absences that are not hierarchically equivalent (Brazeau 2011). These problems  
209 largely result from careless character delimitation. I compensated for these potential flaws by  
210 defining and using only characters that do not logically depend upon other characters.

211 Definitions of morphological character states are provided in the Appendix.

### 212 *Phylogenetic Analyses*

213 For the two legacy-locus molecular datasets, the partitioning scheme was inferred with  
214 PartitionFinder2 v. 2.1.1 (Guindon *et al.* 2010; Lanfear *et al.* 2012, 2017) on the CIPRES  
215 Science Gateway, with subsets being asserted *a priori* according to locus and codon position.  
216 Introns were included. Models with I+G extensions were excluded from consideration due to  
217 undesirable behavior in a model-based framework (Yang 1996). As an alternative *ad hoc*  
218 partitioning scheme for the 9,351-bp alignment, I respectively partitioned all exonic loci so that  
219 1<sup>st</sup>-2<sup>nd</sup> codon positions were placed in their own partition separate from the 3<sup>rd</sup>, and modeled  
220 nucleotide substitution in all partitions under GTR+G. Using AMAS (Borowiec 2016), the full  
221 9,351-bp and 9,062-bp molecular alignments were respectively split according to partition  
222 scheme(s) for partitioned Bayesian total-evidence inference.

223 In total-evidence and morphology-only Bayesian phylogenetic analyses, the Mkv model (Lewis  
224 2001) was used to model substitution of morphological character states, albeit with stationary



## Phylogeny of the Male-Based Ant Genus *Phaulomyrma*

225 frequencies of character states treated as free parameters (Felsenstein 1981) in order to  
226 accommodate asymmetry in character state frequencies. Variation in evolutionary rate among  
227 characters was accommodated by drawing rates from a gamma-distributed prior probability  
228 distribution (+G), approximated with 8 discrete categories  $k$ .

229 All phylogenetic analyses were performed in a Bayesian statistical framework using RevBayes v.  
230 1.0.11 (Höhna *et al.* 2017) compiled on Ubuntu Linux v. 13.04. The following phylogenetic  
231 analyses were implemented: one using the 41-character male morphological dataset alone; one  
232 using the 9,351-bp molecular dataset alone; two total-evidence analyses using the 9,351-bp  
233 molecular alignment, respectively with algorithmic or *ad hoc* partitioning schemes as described  
234 above; and a total-evidence analysis using the 9,062-bp molecular alignment, partitioned  
235 algorithmically as described above with PartitionFinder2. Each analysis consisted of four  
236 independent Markov chain Monte Carlo (MCMC) chains, each run for 50,000 generations. Trees  
237 were sampled every 10 generations, with the first 25% of the run being discarded as burn-in.  
238 MCMCs with respect to all continuous parameters were considered converged if the effective  
239 sample sizes as given in Tracer v. 1.7.1 (Rambaut *et al.* 2018) were  $\geq 200$ , with sufficiency of  
240 MCMC mixing across posterior probability landscapes being qualitatively assessed using traces  
241 of the respective log-likelihoods of each parameter across the course of the analysis. Maximum *a*  
242 *posteriori* trees were compiled from this sample of each run, with node support expressed as  
243 Bayesian posterior probability (BPP).

### 244 *Data Availability and Nomenclature*

245 All nucleotide and morphological data along with PartitionFinder2 configuration files, RevBayes  
246 scripts, and output of all phylogenetic analyses, are available at the Dryad Digital Repository

## Phylogeny of the Male-Based Ant Genus *Phaulomyrma*

247 (doi:10.25338/B8GP7C). Sequence Read Archives (SRAs) of raw UCE reads, and UCE  
248 assemblies, are publicly available on NCBI (Table 2).

249 This article has been registered in Zoobank ([www.zoobank.org](http://www.zoobank.org)). The LSID number is  
250 5F3BECF6-3715-47B3-8D0F-DE7D66E1DA0A.

### 251 **Results**

252 Bayesian total-evidence inference of leptanilline phylogeny using the 9,351-bp legacy-locus  
253 dataset under the two partitioning schemes resulted in similar topologies, with none of the  
254 differences affecting the composition or interrelationship of major clades. All Bayesian total-  
255 evidence phylogenies inferred under the *ad hoc* partitioning schemes are provided on Dryad.  
256 Most nodes in these phylogenies were supported with  $BPP \geq 0.95$ . Those nodes supported with  
257  $BPP < 0.95$  were scattered and shallow (Fig. 1), meaning that the interrelationships among all  
258 major leptanilline clades are well-resolved. Although the sampling of the Leptanillinae was more  
259 extensive than that of Borowiec *et al.* (2019), our inferences were largely congruent. Bayesian  
260 total-evidence inference from the 9,062-bp alignment also drew a consistent conclusion (Fig. 2),  
261 indicating that the taxonomically biased distribution of missing data in the 9,351-bp legacy-locus  
262 dataset does not have an appreciable effect on the backbone of inferred leptanilline phylogeny.  
263 Phylogenetic inference from the 9,351-bp alignment alone, and therefore excluding *P. javana*,  
264 fully corroborates the conclusions of total-evidence Bayesian phylogenetic inference with high  
265 Bayesian posterior probabilities overall, while inference from the morphological dataset alone  
266 was insufficient to resolve the phylogeny of the Leptanillinae (see Dryad). All discussion from  
267 here on refers to the phylogeny inferred under the partitioning scheme derived with  
268 PartitionFinder2 (Fig. 1) for the 9,351-bp molecular alignment, unless otherwise noted.

## Phylogeny of the Male-Based Ant Genus *Phaulomyrma*

269 The clade corresponding to the tribe Anomalomyrmini (labeled as *Protanilla sensu lato* in Fig.  
270 1) is recovered with maximal support (BPP = 1), with *A. boltoni* sister to all sampled *Protanilla*  
271 save *Protanilla* TH03—thus rendering *Protanilla* paraphyletic—well-supported (BPP = 0.9577).  
272 This same topology was recovered by Bayesian total-evidence analysis from the 9,062-bp  
273 alignment, with higher support (BPP = 0.9947) (Fig. 2). Borowiec *et al.* (2019) recovered *A.*  
274 *boltoni* as sister to *Protanilla* TH03 with weak support irrespective of statistical framework,  
275 albeit with more extensive sampling within the Anomalomyrmini, as did total-evidence inference  
276 from the 9,351-bp dataset under the *ad hoc* partitioning scheme (BPP = 0.6535). However, the  
277 internal topology of the Anomalomyrmini does not have any bearing upon the status of  
278 *Phaulomyrma* relative to other male-based leptanilline genera, nor its status relative to  
279 *Leptanilla*.

280 *Noonilla*, *Yavnella argamani* and *Yavnella cf. indica*, *Leptanilla revelierii*, and *Phaulomyrma*  
281 *javana* were firmly recovered within a clade corresponding to the Leptanillini (BPP = 1). As in  
282 Borowiec *et al.* (2019) the Leptanillini bifurcate robustly, with *Y. argamani* (and *Yavnella cf.*  
283 *indica*, which was not included in Borowiec *et al.* [2019]) recovered in a clade otherwise without  
284 described representatives, which is hereinafter designated *Yavnella sensu lato* (BPP = 1).  
285 Although morphologically diverse (Fig. 3), the male morphospecies that comprise the sister-  
286 group to *Yavnella s. l.* are distinguished from that clade by 1) clypeus with a medial axis no  
287 longer than the diameter of the torulus, where the epistomal sulcus is distinct; and 2) pronotum  
288 and mesoscutum that are not extended posteriorly in profile view. Since *L. revelierii* is recovered  
289 within this clade, it is hereinafter referred to as *Leptanilla sensu lato* (BPP = 0.9964). *Leptanilla*  
290 *s. l.* bifurcates into two well-supported clades: one is broadly Eurasian and Australian in its  
291 representation (with a single Afrotropical representative), including *L. revelierii* and *P. javana*

## Phylogeny of the Male-Based Ant Genus *Phaulomyrma*

292 (BPP = 0.9531); the other is Indo-Malayan, and includes *Noonilla* (BPP = 0.9839) (Figs. 1, 4).  
293 Since *L. revelierii* is included within the Eurasian-Australian clade, this clade is hereinafter  
294 referred to as *Leptanilla sensu stricto*. The two circumscriptions of the name *Leptanilla*  
295 presented here are supported by male morphology (see Discussion).

296 *Noonilla* (BPP = 0.9999) is sister to a clade represented by highly distinctive male  
297 morphospecies, recovered with maximal support (BPP = 1) (Figs. 1, 4), that are immediately  
298 recognizable by bizarre metasomal processes (heretofore hypothesized to be extensions of the  
299 gonocoxae *sensu* Boudinot [2018] [Boudinot 2015: Fig. 10D]) and a comb-like row of robust  
300 bristles on the protibia (Fig. 5) in combination with a putatively grasping profemur. These  
301 morphospecies remain undescribed. Boudinot (2015: p. 33) adduced the grasping profemur of  
302 *Noonilla* as an autapomorphy of that genus, which could justify terming the undescribed clade as  
303 *Noonilla*\_cf; but this profemoral condition is more widespread across male Leptanillini than  
304 Boudinot (2015) was aware, and better sampling is required to infer whether the grasping  
305 profemur is a synapomorphy of *Noonilla* and this undescribed clade. I therefore provisionally  
306 refer to said clade as the “Bornean morphospecies-group”: while present sampling is too sparse  
307 to judge whether this clade is precinctive to Borneo, available material exclusively originates on  
308 that island. Of the 9 terminals recovered in the Indo-Malayan subclade, only *Leptanilla* TH01  
309 was included in Borowiec *et al.* (2019) or in the 9,062-bp legacy-locus alignment. The rather  
310 disparate morphospecies *Leptanilla* TH01 and *Leptanilla* zhg-th01 are recovered as a clade with  
311 high support (BPP = 0.9961), and this clade is in turn sister to *Noonilla* + Bornean  
312 morphospecies-group (Figs. 1, 4). *Leptanilla* zhg-th01 is unique among the Leptanillinae in  
313 possessing a recurved mesoscutellar horn (Fig. 6B).

## Phylogeny of the Male-Based Ant Genus *Phaulomyrma*

314 The support values of internal nodes within *Leptanilla s. str.* are generally poor under Bayesian  
315 total-evidence inference from the 9,351-bp legacy-locus alignment, with the placement of  
316 *Leptanilla* ZA01 and *Leptanilla* zhg-bt01 differing according to partitioning scheme. The  
317 position of *P. javana* cannot be confidently resolved within this clade, but the basalmost node of  
318 *Leptanilla s. str.* is well-supported, whether inferred under an algorithmic (BPP = 0.9531) or *ad*  
319 *hoc* (BPP = 0.9585) partitioning scheme. While the internal phylogeny of *Leptanilla s. str.*  
320 cannot be resolved with Bayesian total-evidence inference, the monophyly of this clade is  
321 probable under the model and partitioning schemes used. The topology of *Leptanilla s. str.* is  
322 likely subject to strong stochastic error due to the inclusion of *P. javana*, for which molecular  
323 data are entirely absent. This is supported by Bayesian phylogenetic inference from molecular  
324 data alone, which with only one exception recovers the internal phylogeny of *Leptanilla s. str.*  
325 with  $BPP \geq 0.95$  (see Dryad).

326 Bayesian total-evidence inference from the 9,062-bp alignment (which does not include  
327 *Leptanilla revelierii*, zhg-au02 or zhg-bt01) gives mediocre support to *Leptanilla s. str.* (BPP =  
328 0.9237) inclusive of *P. javana*, but provides a phylogeny consistent with the results of other  
329 phylogenetic analyses (Fig. 2). The recovery of *P. javana* within *Leptanilla s. str.* is therefore  
330 supported by Bayesian total-evidence inference. Qualitatively, male morphological characters  
331 support *Leptanilla s. str.* (see Discussion).

332 *P. javana* and the taxon dubbed *Phaulomyrma* MM01 by Boudinot (2015) and Borowiec *et al.*  
333 (2019) were recovered distant from one another in the leptanilline phylogeny (Figs. 1-2, 4).  
334 Total-evidence phylogenetic inference recovered the latter terminal within *Yavnella s. l.*,  
335 indicating that it was incorrectly assigned to *Phaulomyrma* by these authorities, corroborating  
336 morphological evidence (see Discussion). An undescribed male morphospecies referred to as

## Phylogeny of the Male-Based Ant Genus *Phaulomyrma*

337 *Phaulomyrma* by Boudinot (2015: Fig. 4F) was not sequenced in this study but also conforms  
338 morphologically to *Yavnella s. l.*, and so likewise was incorrectly identified as *Phaulomyrma*.  
339 Conversely, *P. javana* is here recovered within *Leptanilla s. l.*, and moreover within *Leptanilla s.*  
340 *str.* (BPP = 0.9531).

### 341 **Discussion**

#### 342 *Delimitation of Subclades in Leptanillinae using Male Morphology*

343 Male morphological characters corroborate inferred phylogeny at nodes of variable depth. *O.*  
344 *hungvuong* and the four male representatives of the Anomalomyrmini included in the present  
345 study can easily be distinguished from male Leptanillini by the presence of a pterostigma  
346 (although wing venation may be inaccessible due to deciduous wings in some male Leptanillini  
347 [pers. obs.]) and the absence of an ocellar tubercle. Griebenow (in press) provides a formal  
348 description of female-associated male *Protanilla* and a male-based definition of the leptanilline  
349 tribes, as well as *O. hungvuong*. *Yavnella s. l.* is likewise well-supported (Figs. 1-2), as is  
350 *Leptanilla s. l.*, with the former clade diagnosed almost entirely by morphological  
351 symplesiomorphies: the only putative autapomorphy of *Yavnella s. l.* is concavity of the  
352 propodeum in profile view (Fig. 7A), which was previously noted by Kugler (1986) as being  
353 distinctive to *Yavnella*.

354 *Leptanilla s. str.* is identifiable relative to other subclades of *Leptanilla s. l.* based upon the  
355 following combination of male morphological characters: absence of posterior mesoscutellar  
356 prolongation (observed in *Leptanilla zhg-th01* and *Leptanilla TH01*); propodeum convex and  
357 without distinct dorsal face (Fig. 7C); gonopodites articulated (otherwise among the Leptanillini  
358 articulated only in *Leptanilla zhg-th01* and some *Noonilla*); gonocoxae fully separated ventrally  
359 (this character state [Fig. 8A] elsewhere observed among sampled Leptanillini in all *Yavnella s.*

## Phylogeny of the Male-Based Ant Genus *Phaulomyrma*

360 *l.* except for *Yavnella* TH03; and *Leptanilla* zhg-th01); and penial sclerites dorsoventrally  
361 compressed along their entire length, entire, and lacking sculpture (Fig. 9A), this character state  
362 elsewhere observed in Leptanillini only among *Yavnella s. l.* (excluding *Yavnella* TH03) and  
363 *Leptanilla* zhg-th01.

364 *Leptanilla* TH09 is weakly recovered as sister to remaining *Leptanilla s. str.*, including *P.*  
365 *javana*, under all Bayesian total-evidence analyses (Figs. 1-2, 4). Therefore, the phylogeny of *P.*  
366 *javana* relative to other *Leptanilla s. str.* would not be resolved if that clade were delimited to  
367 exclude *Leptanilla* TH09. However, *Leptanilla* TH09 conforms fully to the diagnosis of  
368 *Leptanilla s. str.* given above, and aside from apomorphies of the foreleg (a perhaps opposable  
369 calcar and apical probasitarsal seta; Fig. 10A) is not a phenotypic outlier among the terminals  
370 representing *Leptanilla s. str.* Nor given the weak BPP of *Leptanilla* TH09 as sister to the  
371 remainder of *Leptanilla s. str.* is there probabilistic support for qualitatively defining that clade to  
372 exclude *Leptanilla* TH09. Therefore, *P. javana* can be confidently placed within *Leptanilla s.*  
373 *str.*, despite the inability of Bayesian total-evidence inference from these data and under these  
374 models to resolve its position within that clade.

375 Unlike *Scyphodon*, *Noonilla*, and even the male-based species *Leptanilla palauensis* Smith, 1953  
376 (Petersen, 1968: p. 593), the status of *Phaulomyrma* as a leptanilline—and as an ant—has never  
377 been debated. Wheeler & Wheeler (1930) established the genus based upon the presence of wing  
378 veins and “unusually large genitalia” (Wheeler & Wheeler 1930: p. 193), transferring also  
379 *Leptanilla tanit* Santschi, 1907 to *Phaulomyrma*. Their argument regarding wing venation has no  
380 merit, given that the forewing venation of *P. javana* falls within the range of variation observed  
381 in putative *Leptanilla* morphospecies (Petersen 1968: pp. 594-595), with all leptanilline males  
382 examined by Boudinot (2015) exhibiting at least one compound abscissa on the forewing.



## Phylogeny of the Male-Based Ant Genus *Phaulomyrma*

383 Petersen (1968: p. 597) even referred to *Leptanilla* and *Phaulomyrma* as “nearly identical”  
384 (when comparing these taxa to *L. palauensis*), and returned *L. tanit* to *Leptanilla*, but refrained  
385 from synonymizing *Leptanilla* and *Phaulomyrma* on account of the apparent uniqueness of the  
386 genitalia of *P. javana* as illustrated by Wheeler and Wheeler (1930: Figs. 2A, C). In passing,  
387 Taylor (1965: p. 365) also mentioned *Phaulomyrma* as being “possibly synonymous” with  
388 *Leptanilla*.

389 Examination of a syntype of *P. javana* (lectotypified below) demonstrates that its genitalia are  
390 consistent with other sampled male *Leptanilla s. str.* to the exclusion of males within the Indo-  
391 Malayan sister-group of *Leptanilla s. str.* (Fig. 11). Although the preservation of this specimen  
392 on a slide prevents us from directly confirming stylar articulation, the sharply recurved styli are  
393 consistent with the syndrome seen in dried male leptanillines with articulated gonopodites  
394 (Kugler 1986; Ward and Sumnicht 2012), indicating that the gonopodites are articulated in *P.*  
395 *javana*. *Contra* Fig. 2C of Wheeler and Wheeler (1930), the volsellae of *P. javana* are not  
396 discernible *in situ* (Fig. 11D). If their condition is truly “plate-like” as described by Wheeler and  
397 Wheeler (1930: p. 196), the volsellae of *P. javana* resemble those observed in undescribed  
398 Sicilian male morphospecies attributed to *Leptanilla* (Scupola & Ballarin 2009). Dissection of  
399 Anatolian *Leptanilla* GR03, and Spanish material that closely resembles sequenced males of  
400 *Leptanilla s. str.*, demonstrates that the volsellae are likewise lamellate in these morphospecies,  
401 having much the same condition as in *Leptanilla africana* (Baroni Urbani 1977: Fig. 37) (not  
402 included in this study). Therefore, given the phylogeny of *P. javana* and its morphological  
403 conformity to *Leptanilla s. str.* there is no justification for maintaining the genus *Phaulomyrma*.  
404 It is a nomenclatural irony that Wheeler & Wheeler (1930: p. 193) note that the derivation of the



## Phylogeny of the Male-Based Ant Genus *Phaulomyrma*

405 genus name is from the Greek *phaulus*, which they translate as “trifling or paltry”: the  
406 justification for establishing *Phaulomyrma* as a genus was trifling indeed.

407 A complete male-based diagnosis of *Leptanilla* relative to other Leptanillinae under both broad  
408 and strict circumscriptions of *Leptanilla* is provided below, with putative synapomorphies for the  
409 two circumscriptions represented in italics. Only genital characters could be scored for  
410 *Leptanilla* ZA01.

411 *Leptanilla javana* (Wheeler & Wheeler, 1930) comb. nov.

412 Figs. 11A-D.

413 *Phaulomyrma javana* Wheeler & Wheeler 1930: 193. Figs. 1, 2C.

414 *Phaulomyrma javana* – Petersen 1968: 293. Figs. 16A-C.

### 415 **Lectotype**

416 INDONESIA • ♂; Jawa Barat, “Buitenzorg” [Bogor]; Mar. 1907; F.A.G. Muir leg.; MCZ 31142.

### 417 **Paralectotype**

418 Same data as for lectotype (no accession code).

### 419 **Genus *Leptanilla* Emery, 1870**

420 Type species: *Leptanilla revelierii* Emery, 1870: 196.

421 = *Leptomesites* Kutter, 1948 (286). Synonymy by Baroni Urbani, 1977 (433). Holotype  
422 deposited at MHNG (Muséum d’Histoire Naturelle, Geneva).

423 = *Phaulomyrma* Wheeler & Wheeler, 1930 (193); **syn. nov.** Lectotype and paralectotype  
424 deposited at MCZC (Museum of Comparative Zoology, Cambridge, Massachusetts).

### 425 *Male diagnosis of Leptanilla s. l. relative to other Leptanillinae*

426 1. Mandibles articulated to gena (Fig. 12B).

Phylogeny of the Male-Based Ant Genus *Phaulomyrma*

- 427 2. *Medial axis of clypeus no longer than diameter of torulus, when epistomal sulcus is*  
428 *distinct.*
- 429 3. Antennomere 3 shorter than scape.
- 430 4. Ocelli present and set on tubercle (Fig. 13) (with exception of *Leptanilla* [Bornean  
431 morphospecies-group] zhg-my05).
- 432 5. *Pronotum and mesoscutum posteriorly extended (Fig. 14B-C).*
- 433 6. Notauli absent.
- 434 7. Pterostigma absent.
- 435 8. Propodeum not concave in profile view.
- 436 *Male Diagnosis of Leptanilla s. str. relative to other Leptanilla s. l.*
- 437 9. *Anteromedian ocellus and compound eye not intersecting line parallel to dorsoventral*  
438 *axis of cranium.*
- 439 10. Profemoral ventral cuticular hooks absent.
- 440 11. Ventromedian protibial comb-like row of setae absent.
- 441 12. Infuscation at juncture of Rf and 2s-rs+Rs+4-6 absent.
- 442 13. *Antero-admedian line absent (HAO: 0000128).*
- 443 14. Mesoscutellum not posteriorly prolonged.
- 444 15. Propodeum convex in profile view, without distinct dorsal face.
- 445 16. Abdominal sternite IX without posterolateral filiform processes.
- 446 17. Abdominal tergite VIII broader than long.
- 447 18. Gonocoxae medially separated\*.
- 448 19. Gonopodites articulated.
- 449 20. *Volsella lamellate, entire distally, without denticles\*.*

## Phylogeny of the Male-Based Ant Genus *Phaulomyrma*

450 21. Penial sclerites dorsoventrally compressed, dorsomedian carina absent, ventromedian  
451 carina sometimes present.

452 22. Phallosome situated at penial apex, without vestiture.

453 \*These character states observed so far as is possible with available specimens.

454 *Notes.*

- 455 1. The mandibles are fused to the gena (Fig. 12A) in sampled *Yavnella s. l.* except for  
456 *Yavnella* TH04: this character state is seen elsewhere in male ants only among some  
457 *Simopelta* spp. (Ponerinae) (Brendon Boudinot, pers. comm.).
- 458 2. The epistomal sulcus is often difficult to distinguish in *Leptanilla s. l.*, but the  
459 anteroposterior reduction of the clypeus can be inferred by the situation of the toruli at  
460 the anterior-most margin of the head (cf. Boudinot 2015: p. 30).
- 461 3. Antennomere 3 is longer than the scape in all sampled *Yavnella s. l.* except for *Yavnella*  
462 TH05.
- 463 4. Ocelli are entirely absent in *Yavnella* TH03 and *Yavnella* zhg-bt01. The ocellar tubercle  
464 is absent in the Anomalomyrmini and *O. hungvuong*; within *Leptanilla s. l.* it is absent in  
465 *Leptanilla* zhg-my05, which is here inferred to be a secondary loss.
- 466 5. As noted by Petersen (1968: p. 87), *N. copiosa* contrasts with other described male  
467 Leptanillinae by the lack of an “elongated, laterally compressed” mesosoma. *Yavnella*  
468 was described by Kugler (1986) as sharing this condition, which Petersen (1968) adduced  
469 as plesiomorphic for the Leptanillinae. While the relative modification of the  
470 mesosoma—here approximated by the proportions of the pronotum and mesoscutum—  
471 forms a morphocline across the male Leptanillinae, this morphocline is discontinuous,  
472 with a gap between the morphospace occupied by *Leptanilla s. l.* (Fig. 14B-C) and that

## Phylogeny of the Male-Based Ant Genus *Phaulomyrma*

- 473 occupied by *O. hungvuong*, the Anomalomyrmini, and *Yavnella s. l.* (Fig. 14A). Future  
474 sampling of male Leptanillinae may close this gap in morphospace, which would limit  
475 the diagnostic utility of pronotal and mesonotal length.
- 476 6. The absence of notauli is a synapomorphy of the tribe Leptanillini. The notauli in  
477 *Protanilla* TH01 and *Protanilla* zhg-vn01, in the tribe Anomalomyrmini, are  
478 homoplastically absent.
- 479 7. The absence of the pterostigma (Figs. 15A, C) is a synapomorphy of the Leptanillini.
- 480 8. The convexity of the propodeum in profile view is plesiomorphic for the Leptanillinae.  
481 Its concave condition in *Yavnella* (Kugler 1986) is apomorphic for that genus.
- 482 9. The anteromedian ocellus is not situated orthogonally to the compound eye in profile  
483 view in *Leptanilla s. str.* *Leptanilla* TH01 and zhg-th01, the Bornean morphospecies-  
484 group, and all examined *Noonilla*. The concomitant prognathy of the male cranium is  
485 unique among male Leptanillinae to *Leptanilla s. l.*, and as adduced by Petersen (1968),  
486 this condition appears apomorphic among the Leptanillinae.
- 487 10. A profemoral ventral cuticular hook (Fig. 16B) is unique among the morphospecies  
488 sampled herein to *Leptanilla* (“Bornean morphospecies-group”) zhg-my02 and -05.
- 489 11. The ventromedian comb-like row of setae on the protibia is an autapomorphy of the  
490 Bornean morphospecies-group.
- 491 12. The infuscation observed in the Bornean morphospecies-group at the juncture of Rf and  
492 2s-rs+Rs+4-6 (Fig. 15C) is not enclosed anteriorly by an abscissa and appears to be  
493 homoplasious with the pterostigma observed in male Anomalomyrmini. Infuscation of  
494 the forewing is otherwise absent in the Leptanillini.

## Phylogeny of the Male-Based Ant Genus *Phaulomyrma*

- 495 13. The antero-admedian line is present among sampled Leptanillini only among some  
496 *Yavnella s. l.*
- 497 14. The mesoscutellum is posteriorly prolonged in *Leptanilla* TH01 and *Leptanilla* zhg-th01  
498 (Fig. 6B). The differences in mesoscutellar shape between these morphospecies (see  
499 Appendix) are such that the homology of posterior mesoscutellar prolongation is  
500 uncertain.
- 501 15. The propodeum has a distinct planar to depressed dorsal face in the Bornean  
502 morphospecies-group (Fig. 7B). This condition is an autapomorphy of that clade.
- 503 16. The posterior margin of abdominal sternite IX is variously emarginate to entire in male  
504 Leptanillinae or with a posteromedian process (e.g., *Protanilla* zhg-vn01, *Yavnella*  
505 TH03), but posterolateral filiform processes of abdominal sternite IX are an  
506 autapomorphy of the Bornean morphospecies-group.
- 507 17. Abdominal tergite VIII is longer than broad only in *Noonilla* (Fig. 17B), *Scyphodon* and a  
508 bizarre male morphospecies from Côte d'Ivoire (CASENT0102373) for which molecular  
509 data are unavailable.
- 510 18. The gonocoxae exhibit partial (Fig. 8B) to full (Fig. 8C) medial fusion at least in ventral  
511 view in *Yavnella* TH03, *Noonilla*, and all sampled members of the Bornean  
512 morphospecies-group. Within *Leptanilla s. l.*, complete lack of medial gonocoxal fusion  
513 (Fig. 8A) is a symplesiomorphy of *Leptanilla s. str.*, *Leptanilla* TH01, and *Leptanilla*  
514 zhg-th01.
- 515 19. Articulation of the gonopodites encompasses both cases in which conjunctival membrane  
516 is visible between the gonocoxa and stylus, and those in which the stylus is recurved  
517 relative to the gonocoxa without apparent conjunctival membrane. This character state is

## Phylogeny of the Male-Based Ant Genus *Phaulomyrma*

518 a symplesiomorphy of *Leptanilla s. str.*, and among *Leptanilla s. l.* included in this study  
519 is observed in *Noonilla* zhg-my02 and -6, and *Leptanilla* zhg-th01.

520 20. The volsellae cannot be observed without dissection in many male Leptanillinae (e.g.,  
521 *Noonilla*), limiting my ability to assess their condition. However, *Leptanilla s. str.*  
522 contrast with the Anomalomyrmini, *Yavnella s. l.*, and the Bornean morphospecies-group  
523 in that the volsellae (where visible) are dorsoventrally flattened, entire, and lacking  
524 sculpture (Fig. 18). This is one of only two synapomorphies of *Leptanilla s. str.* relative  
525 to other *Leptanilla s. l.*

526 21. Dorsoventral compression at the penial apex is also observed in *Yavnella s. l.* (except for  
527 *Yavnella* TH03). In the Indo-Malayan sister clade of *Leptanilla s. str.* the penial sclerites  
528 are lateromedially compressed to subcircular, at least basally. *Leptanilla* zhg-th01  
529 exhibits an intermediate condition, with the penial apex being lateromedially compressed  
530 and this condition less pronounced towards the base.

531 22. Position of the phallotreme with distal margin adjoining the penial apex appears to be  
532 ancestral for the Leptanillini. The phallotreme is shifted basally in *Leptanilla* zhg-my02  
533 and -5 (Fig. 19B), *Noonilla*, and *Scyphodon*. The outline of the phallotreme is subcircular  
534 in these morphotaxa. Setae surrounding the phallotreme are observed in *Noonilla* and  
535 *Scyphodon*; this character state is likely a synapomorphy of these genera.

### 536 *Goals of Future Research*

537 Two described male-based species of *Leptanilla* are worth noting here as requiring further study  
538 and acquisition of fresh material: *L. palauensis*, which was transferred with some reservation to  
539 *Leptanilla* from *Probolomyrmex* (Formicidae: Proceratiinae) by Taylor (1965); and *Leptanilla*  
540 *astylina*. Examination of the holotype of *L. palauensis* demonstrates that according to the

## Phylogeny of the Male-Based Ant Genus *Phaulomyrma*

541 morphological hypotheses made herein this species can be confidently referred to *Leptanilla s. l.*,  
542 but beyond that its affinities are unclear. Based upon available illustrations (Petersen 1968: Fig.  
543 1) *L. astylina* likewise can be placed in *Leptanilla s. l.*, and closely resembles *Leptanilla s. str.*,  
544 excluding its genitalia, which to judge from Petersen (1968) are unlike those of any specimen  
545 that was examined in this study, and exclude it from the definition of *Leptanilla s. str.* given  
546 herein.

547 The case of *Scyphodon* must also be briefly addressed here. Examination of a specimen  
548 attributable to this monotypic male-based genus shows that it can be placed in *Leptanilla s. l.* As  
549 reported by Petersen (1968), the genitalia of *Scyphodon* conspicuously resemble those of  
550 *Noonilla*: there is no reason to conclude that *Scyphodon* belongs within *Leptanilla s. str.*, and I  
551 predict that *Scyphodon* is either sister to, or nested within, *Noonilla*. Future total-evidence  
552 Bayesian phylogenetic inference will resolve the relation of *Scyphodon* to other *Leptanilla s. l.*  
553 Future acquisition and examination of novel material may necessitate revision of the male  
554 diagnosis of *Leptanilla* provided here, but this diagnosis is robust to all morphological  
555 observations made with sequenced material. As *Yavnella s. l.*, *Noonilla* and the Bornean  
556 morphospecies-group are known only from males, and *L. revelierii* is known only from female  
557 castes, no argument can yet be made regarding the ranking of the former clades relative to  
558 *Leptanilla*. *Yavnella* is here ranked as a genus, but the description of *Yavnella* workers may  
559 reveal a morphological basis for subjective arguments for the subsumption of *Yavnella* within  
560 *Leptanilla*. The delimitation of genera within the Leptanillini—including the status of *Noonilla*  
561 and undescribed male morphospecies more closely related to that genus than to *L. revelierii*—  
562 therefore depends not only upon phylogenetic resolution of the many lineages known only from  
563 male material, but upon the morphology of corresponding workers. Future molecular sequencing

## Phylogeny of the Male-Based Ant Genus *Phaulomyrma*

564 will be needed to associate workers and/or gynes to leptanilline lineages that are known only  
565 from males: such an effort has successfully linked *Protanilla lini* (Anomalomyrmini) with  
566 previously unassociated males (Griebenow, in press).

### 567 **Conclusions**

568 I have here demonstrated the utility of discrete morphological data within a total-evidence  
569 framework that includes molecular data in inferring the phylogeny of an ant taxon known only  
570 from male morphology. Using probabilistic models, the phylogenetic position of *P. javana* is  
571 robustly inferred in conjunction with taxa for which only molecular data, or both these and male  
572 morphological data, are available. In that phylogeny, *P. javana* and *L. revelierii* are confidently  
573 recovered within a subclade easily diagnosed by male morphological characters; disregarding  
574 future retrieval of worker material and/or novel male specimens, *Phaulomyrma* can be  
575 synonymized with *Leptanilla* despite continued uncertainty in the bounds of the latter genus.  
576 Future work will employ this Bayesian total-evidence approach to infer the affinity of other,  
577 more peculiar leptanilline taxa for which molecular data are unavailable. With a robust  
578 phylogeny inferred for the Leptanillinae that is congruent with male morphology, the parallel  
579 taxonomy that bedevils this little-understood group of ants can begin to be resolved.

### 580 **Conflict of Interest**

581 The author declares no conflict of interest.

### 582 **Acknowledgments**

583 First and foremost, I must thank Ziad Khouri for his generosity in providing indispensable  
584 assistance and conceptual advice on the writing of scripts for the Bayesian phylogenetic analyses  
585 upon which this project relied. I thank Jadranka Rota (MZLU), Debbie Jennings (ANIC), Kevin



## Phylogeny of the Male-Based Ant Genus *Phaulomyrma*

586 Williams (CSCA), and Brian Fisher (CASC) for loans of material for examination and non-  
587 destructive DNA extraction; Stefan Cover was of great help in facilitating access to a syntype of  
588 *Leptanilla javana*. I also thank my present and past lab-mates Jill Oberski and Matt Prebus for  
589 their diligent and painstaking work enriching UCEs from the specimens that were used in this  
590 study (sometimes with my help, sometimes not). In the realm of data collection, I am grateful to  
591 Eli Sarnat, Steve Heydon and Lynn Kimsey for allowing me the usage of equipment for this  
592 study; the aid of Michael Branstetter in providing advice on the retrieval of legacy loci from  
593 UCE datasets; Ziv Lieberman in advising me to use *BBMap*; and my labmate Brendon Boudinot,  
594 who was an enduring source of informative feedback on the coding of morphological  
595 observation into discrete character states. Lastly, I must thank my adviser Phil Ward for his  
596 invaluable feedback on the construction and finer details of this manuscript, along with past  
597 work in acquiring the Sanger-sequenced data that I utilized in this study, and for tutoring me in  
598 the delimitation of protein-coding loci from flanking introns. This research was supported by the  
599 University of California, Davis and by NSF grant DEB-1932405 to P. S. Ward.

### 600 **Appendix**

601 Definition of binary presence/absence morphological characters. Note that all non-genital  
602 morphological data are missing in *Leptanilla* ZA01, since all that remained of this specimen after  
603 destructive DNA extraction was the male genitalia. Missing observations are noted for other  
604 terminals where relevant. Males of *Protanilla lini* Terayama, 2009 were identified as such by  
605 molecular data (Griebenow, in press).

- 606 1. Mesal protibial margins carinate: a sclerotized carina (Fig. 20A) is present (1) on the  
607 mesal margin of the ventral protibial surface in *Noonilla*. This character could not be

Phylogeny of the Male-Based Ant Genus *Phaulomyrma*

- 608 scored in *Leptanilla* TH01. Under the alternative character state (0) the mesal protibial  
609 face is convex (Fig. 20B) to carinate.
- 610 2. Ventral cuticular hook present on profemur: the lateral margin of the ventral profemoral  
611 surface is ventrally produced into a hook-like structure (Figs. 16B, 21B) (1) in *Leptanilla*  
612 (Bornean morphospecies-group) zhg-my02 and -my05. The morphospecies imaged in  
613 Figs. 16B, 21B is closely related to these (Griebenow, in press) but was not sequenced in  
614 this study. Under the alternative character state (0) there are no cuticular extensions of the  
615 profemur (Fig. 16A). This character could not be scored in *Leptanilla* TH01.
- 616 3. Row of ventral protibial bristles present: a single medial row of parallel-sided setae is  
617 present (1) on the ventral protibial surface only in the “Bornean morphospecies-group”  
618 (Fig. 21B). These are robust by comparison to adjacent unmodified setae. Under the  
619 alternative character state (0) setae on the protibial venter are not robust, parallel-sided,  
620 and arranged in a single medial row (Fig. 21A). This character could not be scored in  
621 *Leptanilla* TH01.
- 622 4. Head inclusive of compound eyes wider than long: this character state is observed (1) in  
623 *O. hungvuong*; all male Anomalomyrmini sampled herein; all *Yavnella s. l.* except for  
624 *Yavnella* TH05, -8, and *Yavnella* MM01; *Leptanilla* (Bornean morphospecies-group)  
625 zhg-my04; and *Noonilla* zhg-my06 (Fig. 22B). Under the alternative character state (0)  
626 the head inclusive of the compound eyes is narrower than long in full-face view (Fig.  
627 22A).
- 628 5. Clypeus broader than torular diameter along medial axis: this character state is observed  
629 (1) in *M. heureka*; *O. hungvuong*; in all Anomalomyrmini sampled herein; and in all  
630 *Yavnella s. l.* for which observations are available (Fig. 23B). Clypeus narrower than

## Phylogeny of the Male-Based Ant Genus *Phaulomyrma*

- 631 torular diameter along medial axis (0) (Fig. 23A) may therefore be diagnostic for  
632 *Leptanilla s. l.* This character could not be scored in *Yavnella* TH03, -5 and -8; *Yavnella*  
633 zhg-bt01; *Phaulomyrma* MM01; *Leptanilla* zhg-th01; and *Leptanilla* GR01-3, zhg-au02  
634 and zhg-bt01.
- 635 6. Anterior tentorial pits situated directly anterior to toruli: the anterior tentorial pits are  
636 situated directly anterior to the toruli, in whole (Fig. 24B) or in part (1) so that at least  
637 some portion of the anterior tentorial pit intersects an anteroposterior axis drawn through  
638 the torulus, in *M. heureka*, *O. hungvuong*, all Anomalomyrmini save *Protanilla* TH01,  
639 and all *Yavnella s. l.* save *Yavnella* TH05 and MM01. Under the alternative character  
640 state (0), the anterior tentorial pits are situated anterolaterad the toruli or may not be  
641 readily discernible (Fig. 24A), so that no part of the anterior tentorial pit intersects an  
642 anteroposterior axis drawn through the torulus. This character could not be scored in  
643 *Yavnella* TH03 and -8, *Leptanilla* (Bornean morphospecies-group) zhg-my02, *Leptanilla*  
644 zhg-au02, and *Leptanilla javana*.
- 645 7. Antennomere 3 longer than scape: this character state (1) (Fig. 25B) is observed in  
646 *Protanilla* TH03 and all *Yavnella s. l.* except for *Yavnella* TH05. Under the alternative  
647 character state (0) the scape is shorter than (Fig. 25A) or subequal in length to  
648 antennomere 3. This character could not be scored in *O. hungvuong* or *Leptanilla* zhg-  
649 au02.
- 650 8. Mandible articulated to gena: the base of the male mandible is visibly fused to the gena  
651 (0) in all *Yavnella s. l.* for which observations are available (Fig. 12A), except for  
652 *Yavnella* TH04. In all other terminals in which this character can be assessed a complete

## Phylogeny of the Male-Based Ant Genus *Phaulomyrma*

- 653 point of articulation to the gena is visible (1) (Fig. 12B). This character could not be  
654 scored in *Yavnella* TH03 and MM01; and *Leptanilla* zhg-au02, -TH09 and *javana*.
- 655 9. Occipital margin angularly emarginate in dorsal view: the occiput is coded as angularly  
656 emarginate in dorsal view (1) if the posterolateral corners of the occipital margin are  
657 produced; this character state is observed in *Leptanilla* TH01 (Fig. 26B), *Leptanilla* zhg-  
658 th01, and the Bornean morphospecies-group except for *Leptanilla* zhg-my03. Under the  
659 alternative character state (0) the occiput is linear to shallowly emarginate (Fig. 26A).
- 660 10. Mesoscutum convex in profile view: the mesoscutum is scored as convex (1) if not planar  
661 to shallowly convex (0) (Fig. 27A). Mesoscutal convexity (1) (Fig. 27B) is present in *M.*  
662 *heureka*, *O. hungvuong*, the Anomalomyrmini, *Yavnella s. l.*, and *Leptanilla* (Bornean  
663 morphospecies-group) zhg-my04.
- 664 11. Notauli present: the presence (1) or absence (0) (Fig. 28A) of notauli is always  
665 unambiguous. These are observed only in *M. heureka*, *Protanilla* TH01, and -03 (Fig.  
666 28B).
- 667 12. Parapsidal signa present: the presence (1) (Fig. 29B) or absence (0) (Fig. 29A) of the  
668 parapsidal signa can be difficult to discern, varying from a distinct impressed signum to a  
669 stripe of glabrous cuticle. Some form of parapsidal signum is present in *M. heureka*; *O.*  
670 *hungvuong*; *Protanilla* zhg-vn01; *Yavnella* zhg-th01, cf. *indica* and *argamani*, *Yavnella*  
671 TH02, -4 and -6; *Yavnella* MM01; *Yavnella* TH01; *Noonilla* zhg-my06; the Bornean  
672 morphospecies-group; and *Leptanilla* GR01.
- 673 13. Oblique mesopleural sulcus adjoining posterior mesopectal margin: this character state is  
674 observed (1) in *O. hungvuong*, all Anomalomyrmini (Fig. 30B) and most *Leptanilla s. str.*  
675 for which this character can be scored, except for *Leptanilla* GR01, -03, TH09, and

## Phylogeny of the Male-Based Ant Genus *Phaulomyrma*

676 *Leptanilla* zhg-bt01. Complete bisection of the mesopectus by the oblique mesopleural  
677 sulcus is seen in the Anomalomyrmini. The alternative character state (0) encompasses a  
678 morphocline from the near-complete loss of the oblique mesopleural sulcus (as in  
679 *Leptanilla* zhg-bt01) to the termination of this feature immediately anterior to the upper  
680 metapleuron (e.g., *Yavnella* TH02: Fig. 30A) or propodeum (as in the Bornean  
681 morphospecies-group). This character could not be scored in *Leptanilla* zhg-au02.

682 14. Pterostigma present: this character state is observed (1) only in *M. heureka*, *O.*  
683 *hungvuong*, and the Anomalomyrmini (Fig. 31B). Rf and 2s-rs+Rs+4-6 are confluent in  
684 the Bornean morphospecies-group and in *Noonilla* zhg-my06, producing an infuscation  
685 of the wing membrane that resembles a pterostigma (0). No infuscation or pterostigma (0)  
686 is observed in all other terminals scored (Fig. 31A). Wings are lost in all available  
687 specimens of *Noonilla* zhg-my02, *Leptanilla* zhg-th01, and *Leptanilla* GR03; therefore,  
688 this character could not be scored in these terminals.

689 15. Mesoscutellum densely pubescent: the mesoscutellum is covered with sparse setae (0) in  
690 all leptanilline males sampled herein except for *Leptanilla* TH01 and zhg-th01, and the  
691 Bornean morphospecies-group (Fig. 32B); in these cases, the mesoscutellar vestiture is  
692 densely pubescent (1) (Fig. 32A). This character could not be scored in *Yavnella* TH04.

693 16. Mesoscutellum projecting posteriorly in profile view: this character state is observed (1)  
694 either as a dorsoventrally robust cuneiform process (*Leptanilla* TH01) or as a recurved  
695 spine (*Leptanilla* zhg-th01) (Fig. 6B). Under the alternative character state, the posterior  
696 margin of the mesoscutellum is rounded (0) (Fig. 6A). This character could not be scored  
697 in *Yavnella* TH02.

Phylogeny of the Male-Based Ant Genus *Phaulomyrma*

- 698 17. Propodeum concave in profile view: this character state (1) (Fig. 7A) is an autapomorphy  
699 of *Yavnella s. l.* Under the alternative character state (0) the propodeum is convex in  
700 profile view (Fig. 7C) or produced into a right angle, with largely planar dorsal and  
701 posterior faces (the Bornean morphospecies-group; Fig. 7B).
- 702 18. Abdominal tergite II produced into distinct node: there is a shallow to pronounced dorsal  
703 node (Fig. 33B) present on the petiole (1) in *O. hungvuong*, *Protanilla zhg-vn01* and  
704 TH01-2, *Yavnella* TH08, *Leptanilla zhg-th01*, the Bornean morphospecies-group, and  
705 *Leptanilla s. str.* except for *Leptanilla zhg-au02*. Under the alternative character state (0)  
706 the dorsal surface of the petiole is slightly convex (Fig. 33A), or planar without any  
707 supra-axial projection (as in *Leptanilla zhg-au02*).
- 708 19. Abdominal sternite II with ventral process: a ventral rounded to angular process (1),  
709 shallow or well-produced, is present on abdominal sternite II in *Protanilla zhg-vn01* and  
710 TH02, *Leptanilla zhg-my02* (Fig. 34C) and -5, and *Leptanilla s. str.* except for *Leptanilla*  
711 *zhg-au02*, and *javana*. Under the alternative character state (0) there is no ventrally  
712 projecting process on abdominal sternite II (Fig. 34A). A moderate ventral bulge without  
713 a distinct anterior and/or posterior face may be present under this character state (Fig.  
714 34B). This character could not be scored in *Protanilla* TH01.
- 715 20. Petiole higher than long including peduncle: this character state (Fig. 35B) is observed in  
716 profile view (1) in *Protanilla zhg-vn01* and TH01-2, *Yavnella* MM01, *Yavnella* TH05,  
717 *Yavnella cf. indica* and *zhg-th01*, *Leptanilla* TH01, the Bornean morphospecies-group,  
718 and *Noonilla*. This includes cases in which there is no distinct dorsal node. Under the  
719 alternative character state (0) the distance between two lines drawn tangential to the

### Phylogeny of the Male-Based Ant Genus *Phaulomyrma*

720 dorsal- and ventral-most points of the petiole in profile view is no greater than petiole  
721 length in profile view (Fig. 35A). This character could not be scored in *Yavnella* TH02.

722 21. Cinctus present on abdominal segment III: the corollary of this character state (1) is the  
723 existence of a petiole (Fig. 36B), which has been secondarily lost (0) in *Yavnella* zhg-  
724 th01 (Fig. 36A), *Yavnella* TH02 (as noted by Boudinot 2015: p. 14), and *Noonilla* zhg-  
725 my02. There is a tendency towards petiolar reduction in *Yavnella s. l.* and *Noonilla*, but  
726 in many cases a cinctus on abdominal segment III is still discernible.

727 22. Cinctus present on abdominal segment IV: the corollary of this character state (1) is the  
728 presence of a post-petiole. This character state is unique to *Protanilla* TH03 (Fig. 37B),  
729 although the anterior margin of abdominal segment IV may be slightly constricted  
730 relative to more posterior abdominal segments (0); otherwise, there is no constriction  
731 whatsoever (Fig. 37A).

732 23. Abdominal sternite IX with posteromedian filiform process: while a posteromedian  
733 process of abdominal sternite IX is present in all male Anomalomyrmini and *Opamyрма*  
734 *hungvuong* (0), its filiform condition (1) is unique to *Yavnella* TH03. Abdominal sternite  
735 IX is not thus produced medially in all other male leptanillines sampled herein (0).

736 24. Abdominal sternite IX with posterolateral filiform processes: these “bizarre, elongate,  
737 filamentous extensions” of the metasoma were noted by Boudinot (2015: Fig. 10D) as  
738 being extensions of the gonocoxae *sensu* Boudinot (2018). Detailed examination and  
739 micro-CT segmentation (Griebenow, Fischer and Economo in prep.) demonstrate that  
740 these processes are in fact extensions of abdominal sternite IX (Fig. 38B). This character  
741 state is unique to the Bornean morphospecies-group. Under the alternative character state  
742 (0) the posterior margin of abdominal sternite IX may be medially indented (Fig. 38A),

## Phylogeny of the Male-Based Ant Genus *Phaulomyrma*

- 743 entire, or with a posteromedian process, as noted above. This character could not be  
744 scored in *Leptanilla* zhg-au02.
- 745 25. Abdominal tergite XIII broader than long: this character state is observed (1) in all male  
746 Leptanillinae scored (Fig. 17A) except for *Noonilla*, to which elongation of abdominal  
747 tergite XIII (0) is unique (Fig. 17B). This character could not be scored in *Yavnella*  
748 MM01 and *L. javana*.
- 749 26. Gonocoxae ventromedially fused along entire length: this character state (Fig. 8C) is  
750 observed in *O. hungvuong*, *Yavnella* TH03, and in all terminals within the Bornean  
751 morphospecies-group that could be scored (1). The alternative character state (0)  
752 encompasses partial (Fig. 8B) to complete (Fig. 8A) ventromedian fusion of the  
753 gonocoxae. This character could not be scored in *Protanilla* TH01, *Yavnella* MM01,  
754 *Leptanilla* TH01, *Leptanilla* (Bornean morphospecies-group) zhg-my05, and *L. javana*.
- 755 27. Gonocoxae dorsomedially fused along entire length: this character state is observed (1) in  
756 *O. hungvuong*, *Yavnella* TH03 and the Bornean morphospecies-group (Fig. 39B). Under  
757 the alternative character state (0) the gonocoxae are fully (Fig. 39A) to partly separate  
758 medially. This character could not be scored without dissection in *Noonilla* (in which  
759 abdominal tergite XIII conceals the gonocoxal dorsum) or in *Leptanilla* zhg-au02, -bt01,  
760 ZA01, and *javana*.
- 761 28. Gonocoxa with ventral lamina: a ventral laminate margin, variably produced and shaped,  
762 is present (1) on the gonocoxa (Fig. 40B), or on the basal part of the gonopodite in those  
763 cases in which the gonocoxa and stylus are insensibly fused, in *Yavnella* cf. *indica*;  
764 *Leptanilla* zhg-th01; *Leptanilla* (Bornean morphospecies-group) zhg-my02 and -5; and  
765 *Leptanilla* TH09, GR01-2, ZA01 (Fig. 40B), and zhg-au02. Under the alternative



Phylogeny of the Male-Based Ant Genus *Phaulomyrma*

766 character state (0) no lamina is discernible whatsoever on the gonocoxa (Fig. 40A). I do  
767 not assert primary homology *sensu de Pinna* (1991) of laminate portions of the  
768 gonopodites in *Leptanilla* zhg-my02 and -5 with styli, since this does not meet the  
769 criterion of conjunction (Patterson 1982; de Pinna 1991) in CASENT0178838, a  
770 heterospecific member of the Bornean morphospecies-group (misattributed to *Protanilla*  
771 by Boudinot [2015]). This character could not be scored in *Protanilla* TH01 or in  
772 *Leptanilla* zhg-bt01 and *javana*.

773 29. Stylus articulated to gonocoxa: this character state (1) includes cases in which the stylus  
774 is sharply deflexed relative to the gonocoxa (Fig. 41B) or a conjunctiva is visible between  
775 the gonopodital sclerites. Under the alternative character state (0) a suture might be  
776 visible (as in many *Yavnella s. l.*) or the gonocoxa and stylus insensibly fused (as in the  
777 Bornean morphospecies-group; Fig. 41A). Gonopodital articulation is fully present in *O.*  
778 *hungvuong*, *Protanilla* zhg-vn01, *Yavnella* zhg-bt01, *Leptanilla* zhg-th01, all *Leptanilla*  
779 *s. str.* for which this character can be scored and both *Noonilla* included in this study.  
780 This character could not be scored in *Leptanilla* zhg-bt01.

781 30. Gonopodital apex with vestiture: this character and the next are so termed in order to  
782 encompass cases in which the stylus is insensibly fused to the gonocoxa (figs. 41A, 42A-  
783 B). The only terminals sampled here in which setal vestiture is not present on the  
784 gonopodital apex (0) are the Bornean morphospecies-group (Fig. 42A) except for  
785 *Leptanilla* zhg-my04. Otherwise (1) there are at least some setae present on the  
786 gonopodital apex (Fig. 42B). This character could not be scored in *Leptanilla* zhg-bt01.

787 31. Gonopodital apex bifurcated: this character state is observed (1) only in *Yavnella* TH08  
788 (Fig. 43B), *Leptanilla* ZA01 and GR02. Under the alternative character state (0) the

Phylogeny of the Male-Based Ant Genus *Phaulomyrma*

789 stylus may be entire (Fig. 43A) or may have a subapical tooth. This character could not  
790 be scored in *Leptanilla* zhg-bt01.

791 32. Penial sclerites enclosed dorsally by gonopodites at base: in this character state (1) the  
792 gonopodites may completely enclose (Fig. 44C) or partially overlap with (Fig. 44B) the  
793 penial sclerites. This character state is observed in *M. heureka*, *Yavnella* TH03, *Yavnella*  
794 zhg-th01 and zhg-bt01, the Bornean morphospecies-group, and *Leptanilla* zhg-au02.  
795 Under the alternative character state (Fig. 44A) (0), the penial sclerites are never dorsally  
796 surmounted by any portion of the gonopodites. This character could not be scored in  
797 *Noonilla* zhg-my06 and *L. javana*.

798 33. Penial sclerites dorsally recurved at base in profile view: among the terminals sampled  
799 here, this bizarre character state (1) is only present in *Leptanilla* (Bornean  
800 morphospecies-group) zhg-my02 and -5 (Fig. 45B). In these cases the penial sclerites are  
801 curved at the base so that in preserved specimens the apex is situated dorsally of the  
802 gonocoxae. Otherwise (0) in profile view the penial sclerites are slightly curved at the  
803 base towards the venter of the genital anteroposterior axis (Fig. 45A) or are parallel to  
804 that axis.

805 34. Penial sclerites dorsoventrally compressed at base: this character state is observed (1) in  
806 *M. heureka*, and all *Yavnella s. l.* (Fig. 46B) and *Leptanilla s. str.* for which this character  
807 can be scored. Under the alternative character state (0) the penial sclerites are basally  
808 wider along the dorsoventral axis, exclusive of any ventromedian processes, than along  
809 the lateromedial axis (Fig. 46A). This character could not be scored in *O. hungvuong*,  
810 *Protanilla* TH02-3, *Yavnella* TH03-4 and zhg-bt01, *Leptanilla* TH01, *Noonilla* zhg-  
811 my06, and *L. javana*.

Phylogeny of the Male-Based Ant Genus *Phaulomyrma*

- 812 35. Penial sclerites dorsoventrally compressed at apex: this character state is observed (1) in  
813 *M. heureka*, *Yavnella s. l.* except for *Yavnella* TH03, *Leptanilla s. str.*, and *Leptanilla*  
814 zhg-my03 (Fig. 47B). Under the alternative character state (0) the penial sclerites are  
815 apically wider along the dorsoventral axis, exclusive of any ventromedian processes, than  
816 along the lateromedial axis (Fig. 47A). The alternative character state (0) encompasses  
817 cases in which the penial sclerites are lateromedially compressed to varying extents (e.g.,  
818 *Anomalomyrmini*) or are subcircular in cross-section (e.g., *Noonilla*). This character  
819 could not be scored in *O. hungvuong* or *Protanilla* TH02.
- 820 36. Lateral margins of penial sclerites laminate: this character state is observed (1) in  
821 *Yavnella* TH02-5, *Yavnella* MM01, *Yavnella* zhg-th01, cf. *indica* and *argamani*;  
822 *Leptanilla* zhg-my02 (Bornean morphospecies-group) and *Leptanilla* zhg-my05; and all  
823 *Leptanilla s. str.* (Fig. 48B) for which this character can be scored, except for *Leptanilla*  
824 zhg-bt01. In the Bornean morphospecies-group the lateral laminae, when present, are  
825 strongly produced ventrally relative to the remainder of the penial sclerites. Under the  
826 alternative character state (0) (Fig. 48A) lateral flanges may be present or absent, but  
827 when present are not laminate. This character could not be scored in *M. heureka* and  
828 *Leptanilla* zhg-au02.
- 829 37. Penial sclerites with dorsomedian carina: this character state is observed (1) only in  
830 *Leptanilla* TH01 and *Leptanilla* (Bornean morphospecies-group) zhg-my04 (Fig. 47A).  
831 In both cases the penial sclerites are strongly lateromedially compressed. Under the  
832 alternative character state (0) there is no dorsomedian penial carina, such that the dorsum  
833 of the penial sclerite(s) is/are rounded in cross-section (Fig. 47B). This character could  
834 not be scored in *Protanilla* TH03.

Phylogeny of the Male-Based Ant Genus *Phaulomyrma*

- 835 38. Penial sclerites with ventromedian projection: this character state is observed (1) in  
836 *Leptanilla* zhg-my03-4; *Leptanilla* zhg-th01; and *Leptanilla* zhg-bt01, GR01-2, and zhg-  
837 au02. When present and discernible, the volsellae flank this projection, which can be  
838 rounded (as in *Leptanilla* zhg-my03-4; Fig. 49B) or carinate. Under the alternative  
839 character state (0) the penial sclerites are entirely separated, or if fused then lacking any  
840 ventromedian process (Fig. 49A). This character could not be scored in *M. heureka*, the  
841 *Anomalomyrmini*, *Leptanilla* TH01 and *Yavnella* TH03-8 and *Yavnella* MM01.
- 842 39. Phallotreme flanked with vestiture: this character state (1) occurs only in *Noonilla* (Fig.  
843 50B). Under the alternative character state (0) the phallotrematic rim is visibly bare of  
844 any setae (Fig. 50A). This character could not be scored in *Yavnella* MM01.
- 845 40. Phallotreme preapical: under the alternative character state (0) the phallotreme is situated  
846 adjoining the posterior penial margin or, if the penial sclerites are lateromedially  
847 compressed, at the penial apex (Fig. 19A). This includes cases in which the phallotreme  
848 is situated well basal to the penial apex but has a distal margin that extends to the penial  
849 apex. The phallotreme is therefore preapical (1) in *Leptanilla* (Bornean morphospecies-  
850 group) zhg-my02-3 and -5 (Fig. 19B), and in *Noonilla* zhg-my06. This character could  
851 not be scored in *Protanilla* TH02-3; *Yavnella* TH04, -8 and *Yavnella* zhg-bt01; and  
852 *Yavnella* MM01, and *Leptanilla* zhg-bt01 and *L. javana*.
- 853 41. Penial apex entire: the alternative (0) to this character state encompasses cases in which  
854 the penial sclerites are medially separated at the apex (as in *Protanilla* TH01-2), strongly  
855 bifurcated (Fig. 51A). Under this character state (1) none of these observations apply  
856 (Fig. 51B), encompassing cases in which the distal phallotrematic margin forms a narrow  
857 slit-like indentation in the penial sclerites (e.g., *Yavnella* cf. *indica*: Fig. 44A). The penial

## Phylogeny of the Male-Based Ant Genus *Phaulomyrma*

858 apex is entire in *M. heureka*; *Protanilla* TH03 and zhg-vn01; *Yavnella* TH02, -5-8,  
859 *Yavnella* cf. *indica*, zhg-bt01, and zhg-th01; *Leptanilla* TH01; *Leptanilla* zhg-th01; the  
860 Bornean morphospecies-group; and *Leptanilla* s. str. except for *Leptanilla* ZA01.

## 861 References

- 862 Agosti, D. (1991). Revision of the oriental ant genus *Cladomyrma*, with an outline of the higher  
863 classification of the Formicinae (Hymenoptera: Formicidae). *Systematic Entomology* **16**, 293–  
864 310.
- 865 Bankevich, A., Nurk, S., Antipov, D., Gurevich, A. A., Dvorkin, M., Kulikov, A. S., Lesin, V.  
866 M., Nikolenko, S. I., Pham, S., Pribelski, A. D., Pyshkin, A. V., Sirotkin A. V., Vyahhi, N.,  
867 Tesler, G., Alekseyev, M. A., & Pevzner, P. A. (2012). SPAdes: a new genome assembly  
868 algorithm and its applications to single-cell sequencing. *Journal of Computational Biology*  
869 **19**(5), <https://doi.org/10.1089/cmb.2012.0021>
- 870 Bapst, D. W., Wright, A. M., Matzke, N. J., and Lloyd, G. T. (2016). Topology, divergence  
871 dates, and macroevolutionary inferences vary between different tip-dating approaches applied to  
872 fossil theropods (Dinosauria). *Biology Letters* **12**, 20160237.
- 873 Barden, P., Boudinot, B. E., and Lucky, A. (2017). Where fossils dare and males matter:  
874 combined morphological and molecular analysis untangles the evolutionary history of the spider  
875 ant genus *Leptomyrmex* Mayr (Hymenoptera: Dolichoderinae). *Invertebrate Systematics* **31**,  
876 765–780.
- 877 Baroni Urbani, C. (1977). Materiali per una revision della sottofamiglia Leptanillinae Emery  
878 (Hymenoptera: Formicidae). *Entomologica Basiliensia* **2**, 427–488.
- 879 Baroni Urbani C. and de Andrade, M.L. (2006). A new *Protanilla* Taylor, 1990 (Hymenoptera:  
880 Formicidae: Leptanillinae) from Sri Lanka. *Myrmecologische Nachrichten* **8**, 45–47.
- 881 Belshaw, R. and Bolton, B. (1994). A survey of the leaf litter ant fauna in Ghana, West Africa  
882 (Hymenoptera: Formicidae). *Journal of Hymenoptera Research* **3**, 5–16.
- 883 Billen, J., Bauweleers, E., Hashim, R., and Ito, F. (2013). Survey of the exocrine system in  
884 *Protanilla wallacei* (Hymenoptera, Formicidae). *Arthropod Structure and Development* **42**(3),  
885 173–183.
- 886 Bolton, B. (1990). The higher classification of the ant subfamily Leptanillinae (Hymenoptera:  
887 Formicidae). *Systematic Entomology* **15**, 267–282.
- 888 Bolton, B. (2003). Synopsis and classification of Formicidae. *Memoirs of the American*  
889 *Entomological Institute* **71**, 1–370.

Phylogeny of the Male-Based Ant Genus *Phaulomyrma*

- 890 Borowiec M. L., Schulz, A., Alpert, G.D., and Bañar, P. (2011). Discovery of the worker caste  
891 and description of two new species of *Anomalomyrma* (Hymenoptera: Formicidae: Leptanillinae)  
892 with unique abdominal morphology. *Zootaxa* **2810**, 1–14.
- 893 Borowiec, M. L., C. Rabeling, S. G. Brady, B. L. Fisher, T. R. Schultz, and P. S. Ward. (2019).  
894 Compositional heterogeneity and outgroup choice influence the internal phylogeny of the ants.  
895 *Molecular Phylogenetics & Evolution* **134**, 111–121.
- 896 Boudinot, B. E. (2015). Contributions to the knowledge of Formicidae (Hymenoptera, Aculeata):  
897 a new diagnosis of the family, the first global male-based key to subfamilies, and a treatment of  
898 early-branching lineages. *European Journal of Taxonomy* **120**, 1–62.
- 899 Boudinot, B. E. (2018). A general theory of genital homologies for the Hexapoda (Pancrustacea)  
900 derived from skeletomuscular correspondences, with emphasis on the Endopterygota. *Arthropod*  
901 *Structure and Development* **47**(6), 563–613.
- 902 Brady, S. G., Schultz, T. R., Fisher, B. L., and Ward, P. S. (2006). Evaluating alternative  
903 hypotheses for the early evolution and diversification of ants. *Proceedings of the National*  
904 *Academy of Sciences of the United States of America* **103**, 18172–18177
- 905 Branstetter, M. G., Longino, J. T., Ward, P. S., and Faircloth, B.C. (2017). Enriching the ant tree  
906 of life: enhanced UCE bait set for genome-scale phylogenetics of ants and other Hymenoptera.  
907 *Methods in Ecology & Evolution* **8**(1), 768–776.
- 908 Brazeau, M. D. (2011). Problematic character coding methods in morphology and their effects.  
909 *Biological Journal of the Linnean Society* **104**, 489–498.
- 910 Brues, C. T. (1925). *Scyphodon*, an anomalous genus of Hymenoptera of doubtful affinities.  
911 *Treubia* **6**, 93–96.
- 912 Bushnell, B. (2014). ‘BBMap: a fast, accurate, splice-aware aligner.’ Available at  
913 <https://sourceforge.net/projects/bbmap/>.
- 914 Castresana, J. (2000). Selection of conserved blocks from multiple alignments for their use in  
915 phylogenetic analysis. *Molecular Biology & Evolution* **17**, 540–552.
- 916 Chen Z.-L., Shi, F.-M., and Zhou, S.-Y. (2017). First record of the monotypic genus *Opamyрма*  
917 (Hymenoptera: Formicidae) from China. *Far Eastern Entomologist* **335**, 7–11.
- 918 Emery, C. (1870). Studi mirmecologici. *Bullettino della Società Entomologica Italiana* **2**, 193–  
919 201.
- 920 Faircloth, B. C. (2013). ‘Illumiprocessor: a trimmomatic wrapper for parallel adapter and quality  
921 trimming.’ Available at <http://dx.doi.org/10.6079/J6079ILL> Faircloth, B. C. (2016). PHYLUC  
922 is a software package for the analysis of conserved genomic loci. *Bioinformatics* **32**(5), 786–788.  
923 <https://doi.org/10.1093/bioinformatics/btv646>
- 924 Felsenstein, J. (1981). Evolutionary trees from DNA sequences: a maximum likelihood  
925 approach. *Journal of Molecular Evolution* **17**(6), 368–376.



Phylogeny of the Male-Based Ant Genus *Phaulomyrma*

- 926 Guindon, S., Dufayard, J. F., Lefort, V., Anisimova, M., Hordijk, W., and Gascuel, O. (2010).  
927 New algorithms and methods to estimate maximum-likelihood phylogenies: assessing the  
928 performance of PhyML 3.0. *Systematic Biology* **59**(3), 307–321.
- 929 Grabherr, M. G., Haas, B. J., Yassour, M., Levin, J. Z., Thompson, D. A., Amit, I., Adiconis, X.,  
930 ... Regev, A. (2011). Full-length transcriptome assembly from RNA-Seq data without a  
931 reference genome. *Nature Biotechnology* **29**(7), 644–652. Published 2011 May 15.  
932 doi:10.1038/nbt.1883
- 933 Griebenow, Z. H. In press. Delimitation of tribes in the subfamily Leptanillinae (Hymenoptera:  
934 Formicidae), with a description of the male of *Protanilla lini* TERAYAMA, 2009. *Myrmecological*  
935 *News* **30**, 229-xxx.
- 936 Hsu, P.-W., Hsu, F.-C., Hsiao, Y., and Lin, C.-C. (2017). Taxonomic notes on the genus  
937 *Protanilla* (Hymenoptera: Formicidae: Leptanillinae) from Taiwan. *Zootaxa* **4268**(1), 117–130.  
938 <http://dx.doi.org/10.11646/zootaxa.4268.1.7>
- 939 Höhna, S., Landis, M. J., and Heath, T. A. (2017). Phylogenetic inference using RevBayes.  
940 *Current Protocols in Bioinformatics*, <https://doi.org/10.1002/cpbi.22>
- 941 Hoang, D. P., Chernomor, O., von Haeseler, A., Minh, B. Q., and Vinh, L. S. (2018). UFBBoot2:  
942 improving the ultrafast bootstrap approximation. *Molecular Biology and Evolution* **35**(2), 518–  
943 522.
- 944 Katoh, K., Asimenos, G., and Toh, H. (2009). Multiple alignment of DNA sequences with  
945 MAFFT. In 'Bioinformatics for DNA Sequence Analysis'. (Ed. D. Posada.) pp. 39–64.  
946 (Springer: New York City, NY.)
- 947 Katoh, K., Rozewicki, J., and Yamada, K. D. (2019). MAFFT online service: multiple sequence  
948 alignment, interactive sequence choice and visualization. *Briefings in Bioinformatics* **20**(4),  
949 1160–1166.
- 950 Kjer, K., Borowiec, M. L., Frandsen, P. B., Ware, J. and Wiegmann, B. (2018). Advances using  
951 molecular data in insect systematics. *Current Opinions in Insect Science* **18**, 40–47.
- 952 Kück, P., Hita Garcia, F., Misof, B., and Meusemann, K. (2011). Improved phylogenetic  
953 analyses corroborate a plausible position of *Martialis heureka* in the ant tree of life. *PLOS One* **6**,  
954 e21031.
- 955 Kugler, J. (1986). The Leptanillinae (Hymenoptera: Formicidae) of Israel and a description of a  
956 new species from India. *Israel Journal of Entomology* **20**, 45–57.
- 957 Kutter, H. (1948). Beitrag zur Kenntnis der Leptanillinae (Hym. Formicidae): eine neue  
958 Ameisengattung aus Süd-Indien. *Mitteilungen der Schweizerischen Entomologischen*  
959 *Gesellschaft* **11**, 286–295.
- 960 Lanfear, R., Calcott, B., Ho, S. Y., and Guindon, S. (2012). PartitionFinder: combined selection  
961 of partitioning schemes and substitution models for phylogenetic analyses. *Molecular Biology*  
962 *and Evolution* **29**(6), 1695–1701.

Phylogeny of the Male-Based Ant Genus *Phaulomyrma*

- 963 Lanfear, R., P. B. Frandsen, A. M. Wright, T. Senfeld, and B. Calcott. (2016). PartitionFinder 2:  
964 New Methods for Selecting Partitioned Models of Evolution for Molecular and Morphological  
965 Phylogenetic Analyses. *Molecular Biology and Evolution* **34**(3), 772–773.
- 966 Leong, C.–M., Yamane, S., and Guénard, B. (2018). Lost in the city: discovery of the rare ant  
967 genus *Leptanilla* (Hymenoptera: Formicidae) in Macau with description of *Leptanilla*  
968 *macauensis* sp. nov. *Asian Myrmecology* **10**, e010001. DOI: 10.20362/am.010001
- 969 Lewis, P. O. (2001). A likelihood approach to estimating phylogeny from discrete morphological  
970 character data. *Systematic Biology* **50**(6), 913–925.
- 971 López, F., Martínez, M. D., and Barandica, J. M. (1994). Four new species of the genus  
972 *Leptanilla* (Hymenoptera: Formicidae) from Spain – relationships to other species and ecological  
973 issues. *Sociobiology* **24**, 179–212.
- 974 Man, P.; Ran, H., Chen, Z., and Xu, Z. (2017). The northernmost record of Leptanillinae in  
975 China with description of *Protanilla beijingensis* sp. nov. (Hymenoptera: Formicidae). *Asian*  
976 *Myrmecology* **9**, e009008. DOI: 0.20362/am.009008
- 977 Masuko, K. (1990). Behavior and ecology of the enigmatic ant *Leptanilla japonica* Baroni  
978 Urbani (Hymenoptera: Formicidae: Leptanillinae). *Insectes Sociaux* **37**(1), 31–57.
- 979 Matzke, N. J. and Wright, A. (2016). Inferring node dates from tip dates in fossil Canidae: the  
980 importance of tree priors. *Biology Letters*, **12**, 20160328. <https://doi.org/10.1098/rsbl.2016.0328>
- 981 Miller, M. A., Pfeiffer, W., and Schwartz, T. (2010). Creating the CIPRES Science Gateway. In  
982 ‘Proceedings, the Gateway Computing Environments Workshop (GCE)’, 14 November 2010,  
983 New Orleans, LA. pp. 1–8. (Institute of Electrical and Electronics Engineers: Piscataway, NJ.)
- 984 Moreau, C. S., Bell, C. D., Vila, R., Archibald, S. B., and Pierce, N. E. (2006). Phylogeny of the  
985 ants: diversification in the age of angiosperms. *Science* (Washington, D. C.) **312**, 101–104.
- 986 Nguyen, L.–T., Schmidt, H. A., von Haeseler, A., and Minh, B. Q. (2015). IQ–TREE: A Fast and  
987 Effective Stochastic Algorithm for Estimating Maximum–Likelihood Phylogenies. *Molecular*  
988 *Biology and Evolution* **32**(1), 268–274.
- 989 Niehuis, O., Hartig, G., Grath, S., Pohl, H., Lehmann, J., Tafer, H., ... Misof, B. (2012).  
990 Genomic and morphological evidence converge to resolve the enigma of Strepsiptera. *Current*  
991 *Biology* **22**(14), 1309–1313.
- 992 Ogata, K., Terayama, M., and Masuko, K. (1995). The ant genus *Leptanilla*: discovery of the  
993 worker–associated male of *Leptanilla japonica*, and a description of a new species from Taiwan  
994 (Hymenoptera: Formicidae: Leptanillinae). *Systematic Entomology* **20**, 27–34.
- 995 O’Reilly, J. E., dos Reis, M., and Donoghue, P. C. J. (2015). Dating tips for divergence–time  
996 estimation. *Trends in Genetics* **31**(11), 637–650.
- 997 Patterson, C. (1982). Morphological characters and homology. In ‘Problems of Phylogenetic  
998 Reconstruction’. (Eds. K. A. Joysey and A. E. Friday.) pp. 21–74. (Academic Press: London,  
999 UK.)



Phylogeny of the Male-Based Ant Genus *Phaulomyrma*

- 1000 Petersen, B. (1968). Some novelties in presumed males of Leptanillinae (Hym., Formicidae).  
1001 *Entomologiske Meddelelser* **36**, 577–598.
- 1002 de Pinna, M. C. C. (1991). Concepts and tests of homology in the cladistic paradigm. *Cladistics*  
1003 **7**, 367–394.
- 1004 Pleijel, P. (1995). On character coding for phylogeny reconstruction. *Cladistics* **11**, 309–315.
- 1005 Rabeling, C., Brown, J., and Verhaagh, M. (2008). Newly discovered sister lineage sheds light  
1006 on early ant evolution. *Proceedings of the National Academy of Sciences of the United States of*  
1007 *America* **105**(39), 14913–14917.
- 1008 Rambaut, A., Drummond, A. J., Xie, D., Baele, D., and Suchard, M. A. (2018). Posterior  
1009 summarization in Bayesian phylogenetics using Tracer 1.7. *Systematic Biology* **1;67**(5), 901–  
1010 904.
- 1011 Robertson, H. G. (2000). Formicidae (Hymenoptera: Vespoidea). In ‘Dâures Biodiversity of the  
1012 Brandberg Massif, Namibia’. (Eds. A. H. Kirk–Spriggs and E. Marais.) pp. 371–382.  
1013 Cimbabesia Memoir 9. (National Museum of Namibia: Windhoek.)
- 1014 Robertson, J. A. and Moore, W. (2016). Phylogeny of *Paussus* L. (Carabidae: Paussinae):  
1015 unravelling morphological convergence associated with myrmecophilous life histories.  
1016 *Systematic Entomology* **42**(1), 124–170. <https://doi.org/10.1111/syen.12205>
- 1017 Ronquist, F., Klopfstein, S., Vilhelmsen, L., Schulmeister, S., Murray, D. L., and Rasnitsyn, A.  
1018 P. (2012). A total–evidence approach to dating with fossils, applied to the early radiation of the  
1019 Hymenoptera. *Systematic Biology* **61**(6), 973–999.
- 1020 Scupola, A. and Ballarin, R. (2009). The genus *Leptanilla* Emery, 1870 in Sicily (Hymenoptera:  
1021 Formicidae). *Myrmecological News* **12**, 129–132.
- 1022 Sánchez, N., Yamasaki, H., Pardos, F., Sørensen, M. V., and Martínez, A. (2016). Morphology  
1023 disentangles the systematics of a ubiquitous but elusive meiofaunal group (Kinorhyncha:  
1024 Pyncophyidae). *Cladistics* **32**(5), 479–505. <https://doi.org/10.1111/cla.12143>
- 1025 Strong, E. E. and Lipscomb, D. (1999). Character coding and inapplicable data. *Cladistics* **15**,  
1026 363–371.
- 1027 Taylor, R. W. (1965). A monographic revision of the rare tropicopolitan ant genus  
1028 *Probolomyrmex* Mayr (Hymenoptera: Formicidae). *Transactions of the Royal Entomological*  
1029 *Society of London* **117**, 345–365.
- 1030 Taylor, R. W. (1980). Notes on the Russian endemic ant genus *Aulacopone* Arnoldi  
1031 (Hymenoptera: Formicidae). *Psyche* **86**(4), 353–361.
- 1032 Ward, P. S. and Sumnicht, T. P. (2012). Molecular and morphological evidence for three  
1033 sympatric species of *Leptanilla* (Hymenoptera: Formicidae). *Myrmecological News* **17**, 5–11.

Phylogeny of the Male-Based Ant Genus *Phaulomyrma*

- 1034 Ward, P. S., Brady, S. G., Fisher, B. L., and Schultz, T. R. (2010). Phylogeny and biogeography  
1035 of dolichoderine ants: effects of data partitioning and relict taxa on historical inference.  
1036 *Systematic Biology* **59**, 342–362.
- 1037 Wheeler, G. C. and Wheeler, E. W. (1930). Two new ants from Java. *Psyche* **37**(3), 193–201.
- 1038 Wipfler, B., Letsch, H., Frandsen, P. B., Kapli, P., Mayer, C., Buckley, T. R., Donath, A. ...  
1039 Simon, S. (2019). Evolutionary history of Polyneoptera and its implications for our  
1040 understanding of early winged insects. *Proceedings of the National Academy of Sciences of the*  
1041 *United States of America* **116**(8), 3024–3029.
- 1042 Wong, M. K. L. and Guénard, B. (2016). *Leptanilla hypodracos* sp. n., a new species of the  
1043 cryptic ant genus *Leptanilla* (Hymenoptera, Formicidae) from Singapore, with new distribution  
1044 data and an updated key to Oriental *Leptanilla* species. *ZooKeys* **551**, 129–144.
- 1045 Yamada, A., Nguyen, D. D., and Eguchi, K. (2020). Unveiling the morphology of the Oriental  
1046 rare monotypic ant genus *Opamyрма* Yamane, Bui & Eguchi, 2008 (Hymenoptera: Formicidae:  
1047 Leptanillinae) and its evolutionary implications, with first descriptions of the male, larva,  
1048 tentorium, and sting apparatus. *Myrmecological News* **30**, 27–52.
- 1049 Yang, Z. (1996). Among-site rate variation and its impact on phylogenetic analyses. *Trends in*  
1050 *Ecology and Evolution* **11**, 367–372.
- 1051 Yoder, M. J., I. Miko, K. C. Seltmann, M. A. Bertone, and A. R. Deans. (2010). A gross anatomy  
1052 ontology for Hymenoptera. *PLOS One* **5**, e15991.

Phylogeny of the Male-Based Ant Genus *Phaulomyrma*

1053 Fig. 1. Bayesian total-evidence phylogeny of the Leptanillinae under partitioning scheme  
 1054 inferred with PartitionFinder2 for 9,351-bp legacy-locus alignment. Phylogeny was rooted *a*  
 1055 *posteriori* on *Martialis heureka*. Nodes with BPP $\geq$ 0.95 marked in red. (A) *Protanilla* zhg-vn01  
 1056 (CASENT0842613); (B) *Yavnella* TH08 (CASENT022755; Shannon Hartman); (C) *Leptanilla*  
 1057 zhg-my02 (CASENT0106416).

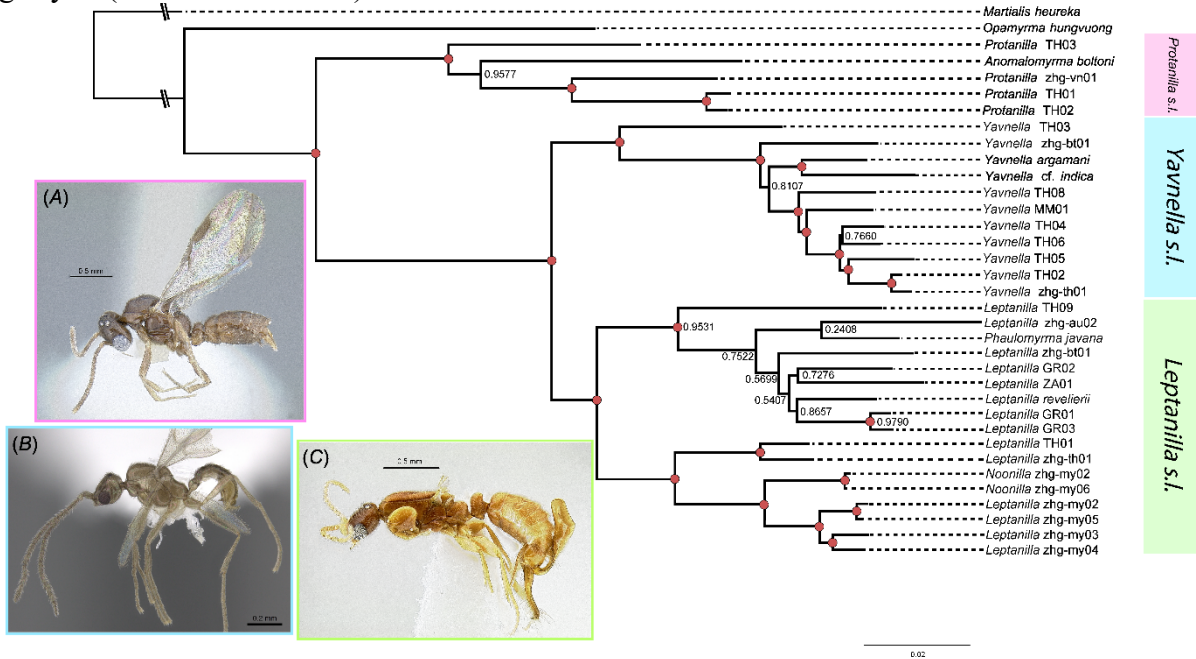

1058

1059

## Phylogeny of the Male-Based Ant Genus *Phaulomyrma*

1060 Fig. 2. Bayesian total-evidence phylogeny of the Leptanillinae under partitioning scheme  
1061 inferred with PartitionFinder2 for 9,062-bp legacy-locus alignment. Phylogeny was rooted *a*  
1062 *posteriori* on *Martialis heureka*. Nodes with BPP $\geq$ 0.95 marked in red.

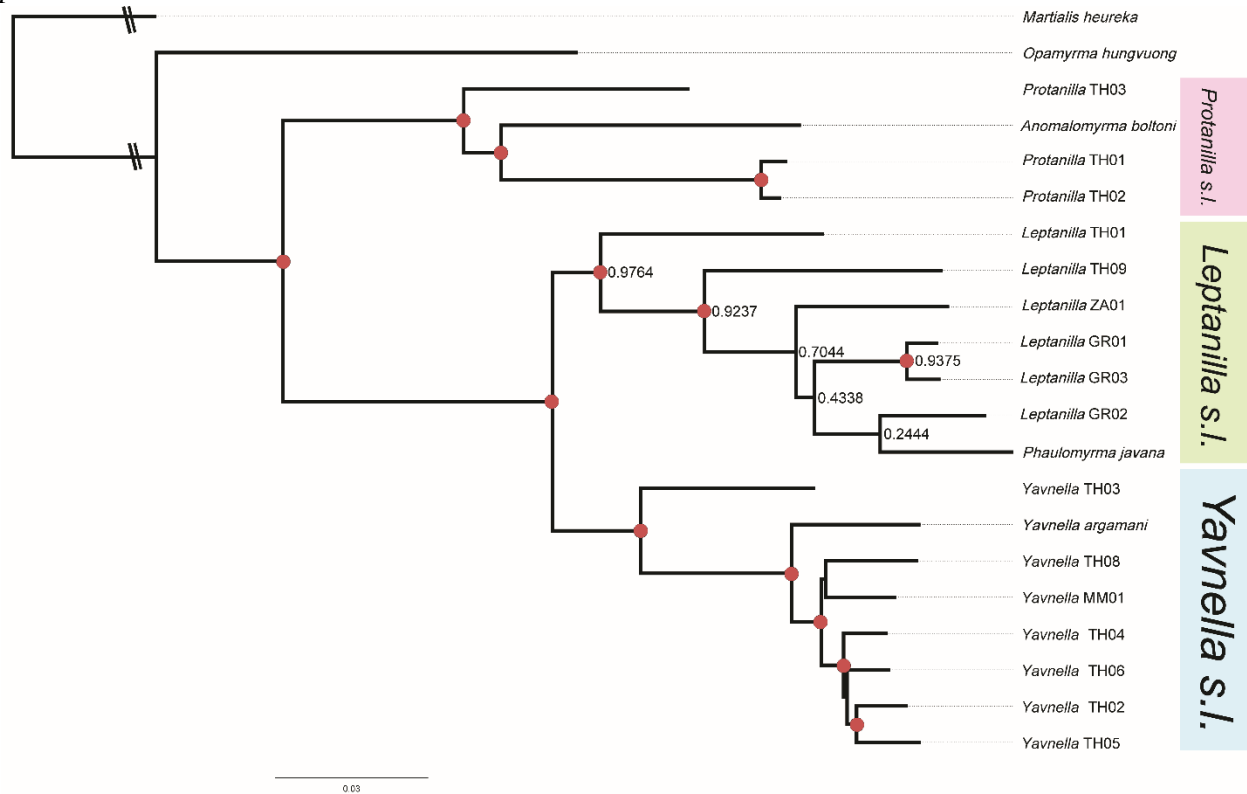

1063

Phylogeny of the Male-Based Ant Genus *Phaulomyrma*

1064 Fig. 3. Selected diversity of male *Leptanilla s. l.* (A) *Leptanilla* TH01 (CASENT0119792; April  
1065 Nobile); (B) *Leptanilla* zhg-bt02 (CASENT084612; not sequenced in this study); (C) *Noonilla*  
1066 zhg-my04 (CASENT0842610; not sequenced in this study); (D) *Leptanilla* (Bornean  
1067 morphospecies-group) zhg-my05 (CASENT0842571). Scale bar A=0.2 mm.; B=1 mm.; C-  
1068 D=0.5 mm.

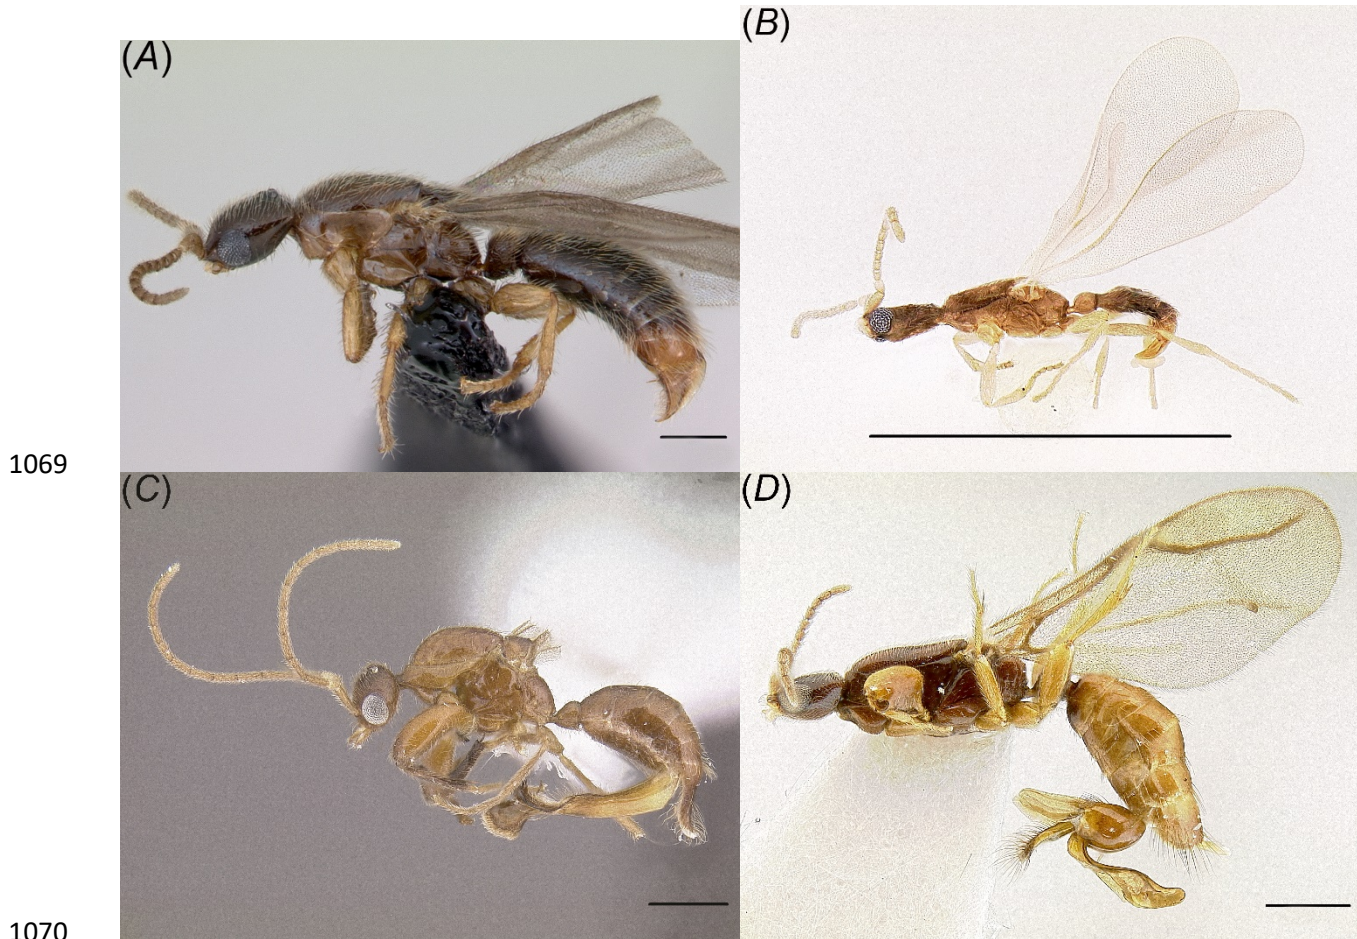



Phylogeny of the Male-Based Ant Genus *Phaulomyrma*

1071 Fig. 4. Bayesian total-evidence phylogeny of *Leptanilla s. l.* under partitioning scheme inferred  
1072 with PartitionFinder2 for 9,351-bp legacy-locus alignment. Phylogeny was rooted *a posteriori* on  
1073 *Martialis heureka*. Nodes with BPP $\geq$ 0.95 marked in red.

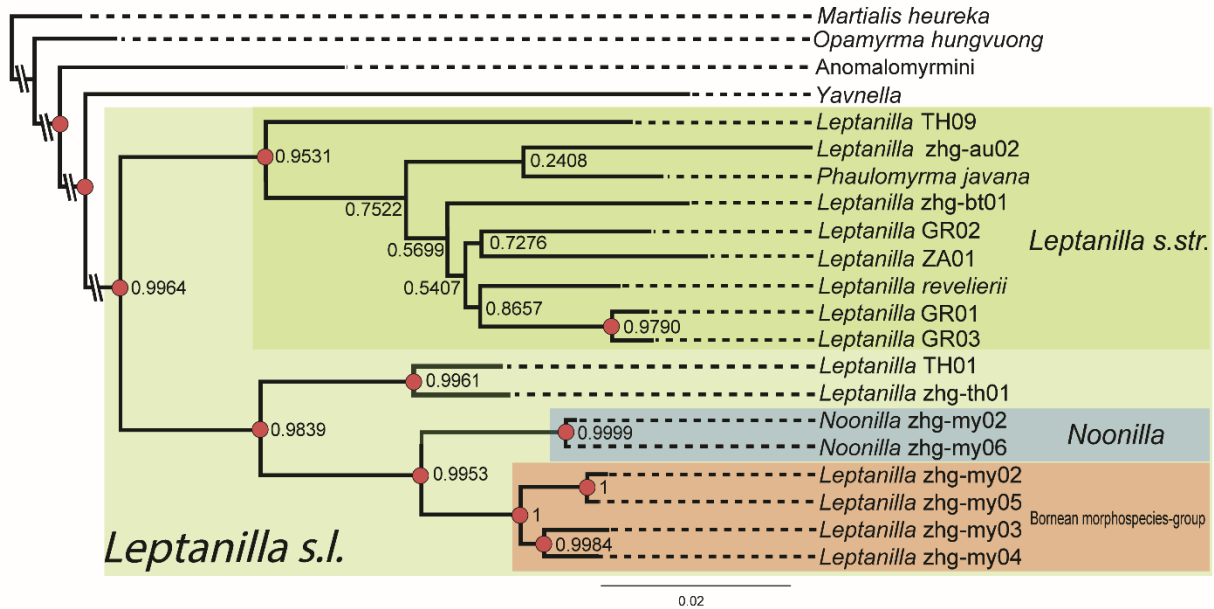

1074

Phylogeny of the Male-Based Ant Genus *Phaulomyrma*

1075 Fig. 5. Protibia of *Leptanilla* zhg-my04 (CASENT0842555). Scale bar = 0.2 mm.

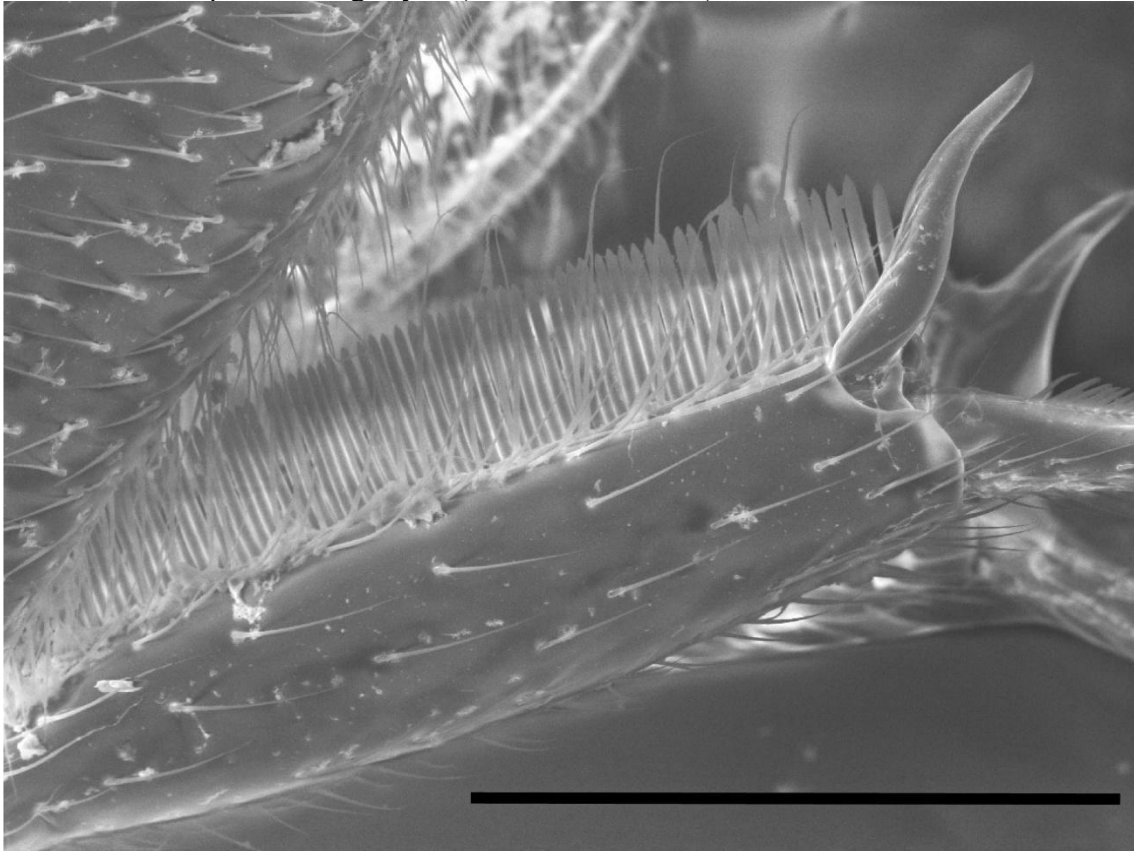

1076

Phylogeny of the Male-Based Ant Genus *Phaulomyrma*

1077 Fig. 6. Presence (B: *Leptanilla* zhg-th01; CASENT0842619) versus absence (A: *Yavnella* zhg-  
1078 th01; CASENT0842621) of the posterior prolongation of the mesoscutellum in male Leptanillini.  
1079 Scale bar = 0.3 mm.

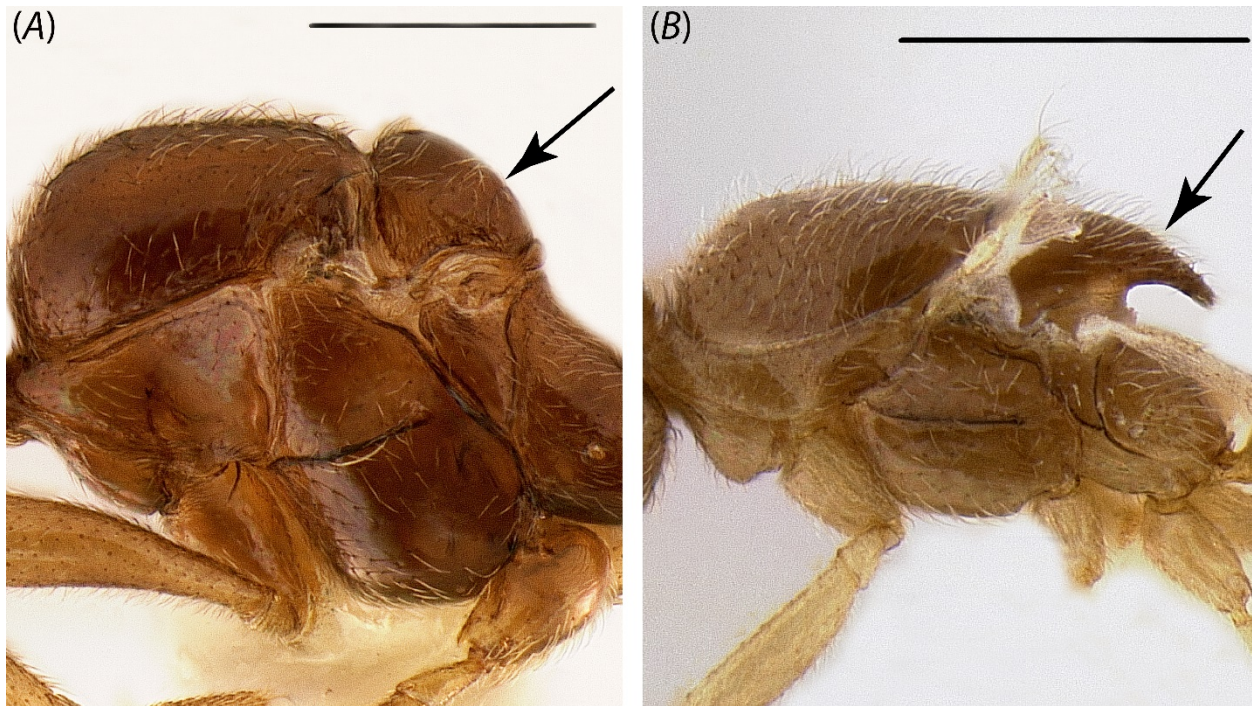

1080



Phylogeny of the Male-Based Ant Genus *Phaulomyrma*

1081 Fig. 7. Conditions of the propodeum in the Leptanillinae. (A) Concave (*Yavnella* zhg-bt01;  
1082 CASENT0106384); (B) convex with distinct dorsal face (*Leptanilla* zhg-my02;  
1083 CASENT0106456); (C) convex without distinct dorsal face (*Protanilla lini* [OKENT0011097];  
1084 male described by Griebenow, in press) (not sequenced in this study).

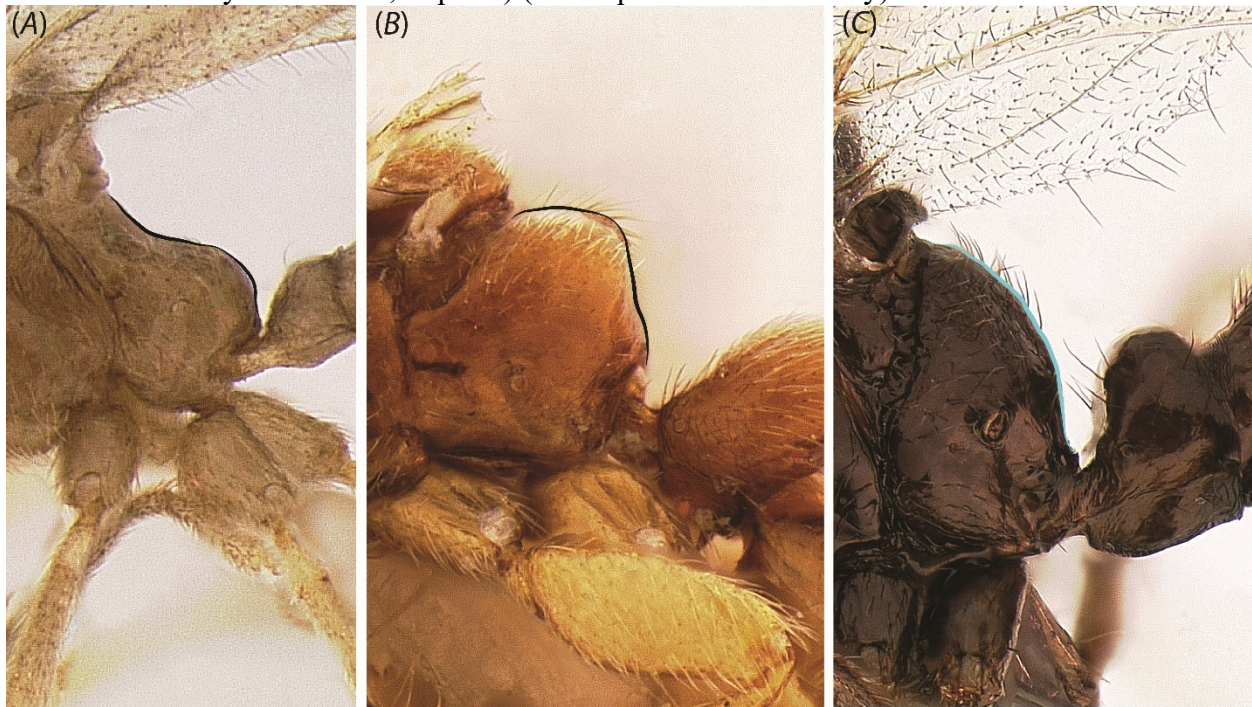

1085

Phylogeny of the Male-Based Ant Genus *Phaulomyrma*

1086 Fig. 8. Ventral view of male genitalia across the Leptanillini. (A) *Leptanilla* ZA01  
1087 (CASENT0106354), (B) *Noonilla* zhg-my02 (CASENT0842595); (C) *Leptanilla* zhg-my04  
1088 (CASENT0842553). Scale bar A = 0.1 mm.; B = 0.3 mm.; and C = 0.5 mm.

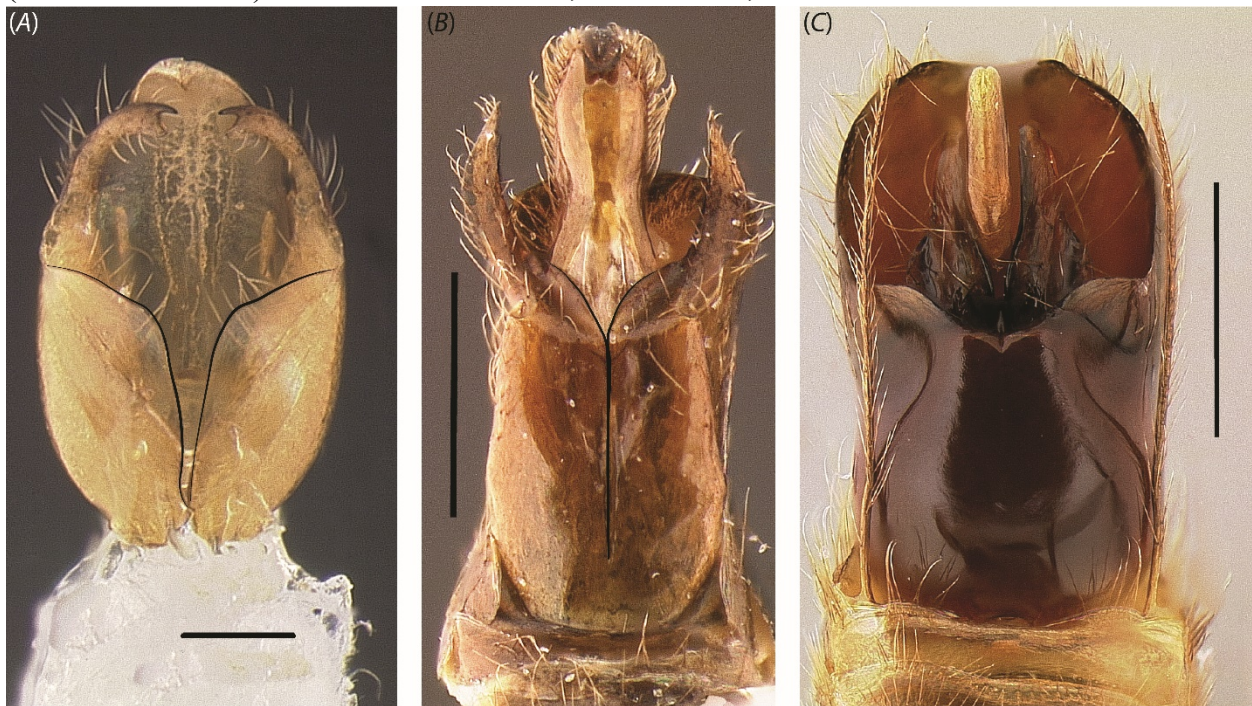

1089



Phylogeny of the Male-Based Ant Genus *Phaulomyrma*

1090 Fig. 9. Dorsoventral (A) (*Yavnella* zhg-th01; CASENT0842620) vs. lateromedial (B) (*Leptanilla*  
1091 zhg-my04; CASENT0842553) compression of the penial sclerites in posterodorsal view.  
1092 Dorsomedian carina marked with arrow. Scale bar = 0.3 mm.

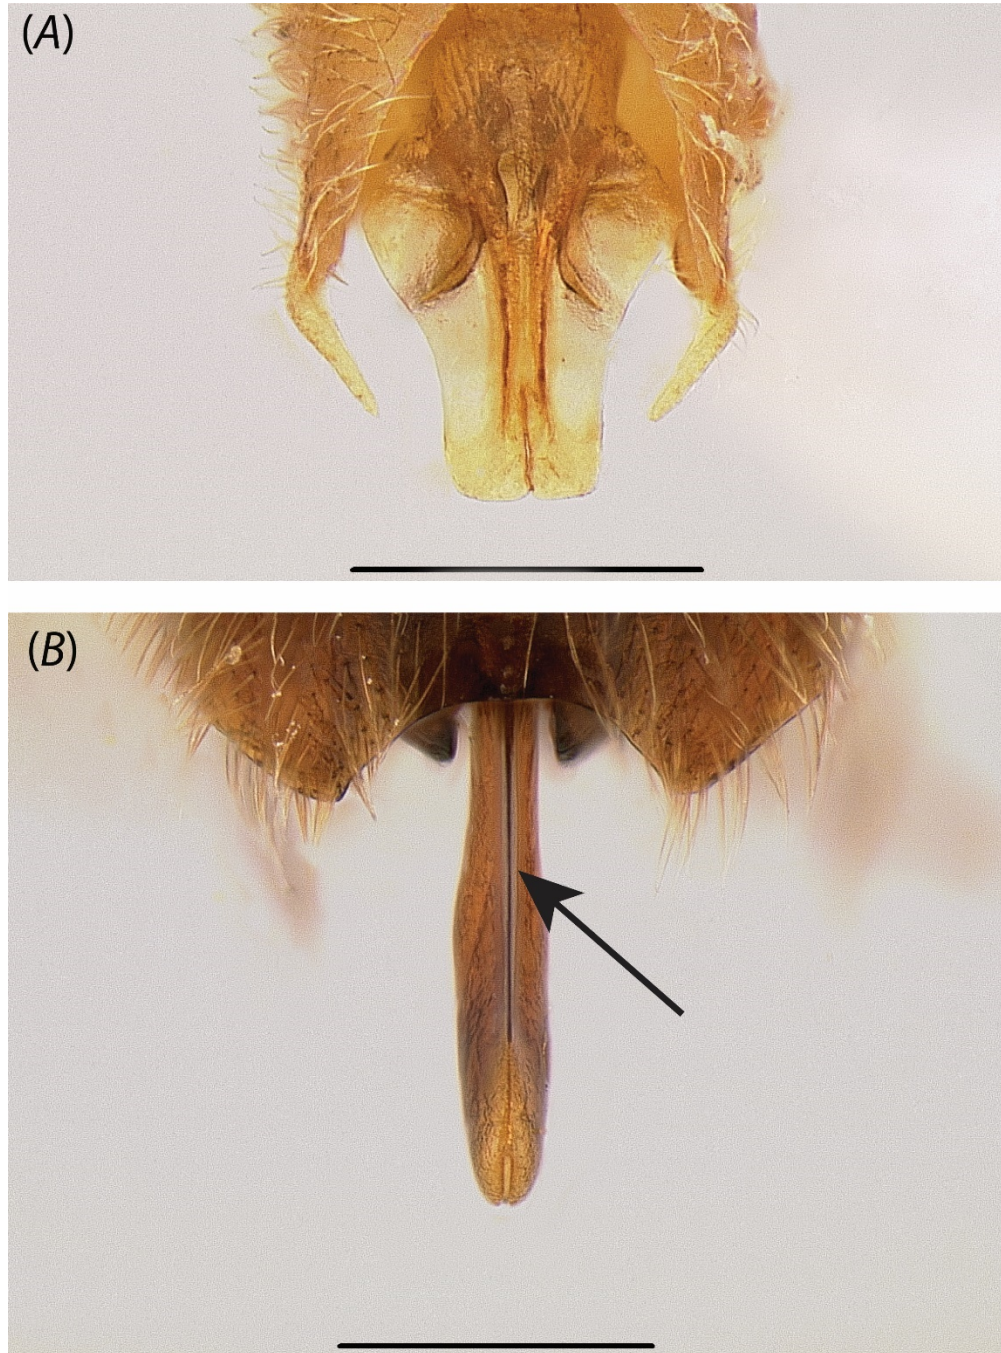

1093

1094

Phylogeny of the Male-Based Ant Genus *Phaulomyrma*

1095 Fig. 10. Profemur, protibia, and basal protarsomeres of (A) *Leptanilla* TH09 (CASENT0842664)  
1096 and (B) *Leptanilla* zhg-bt01. Abbreviations: clc = calcar; pbs = probasitarsal seta. Not to scale.

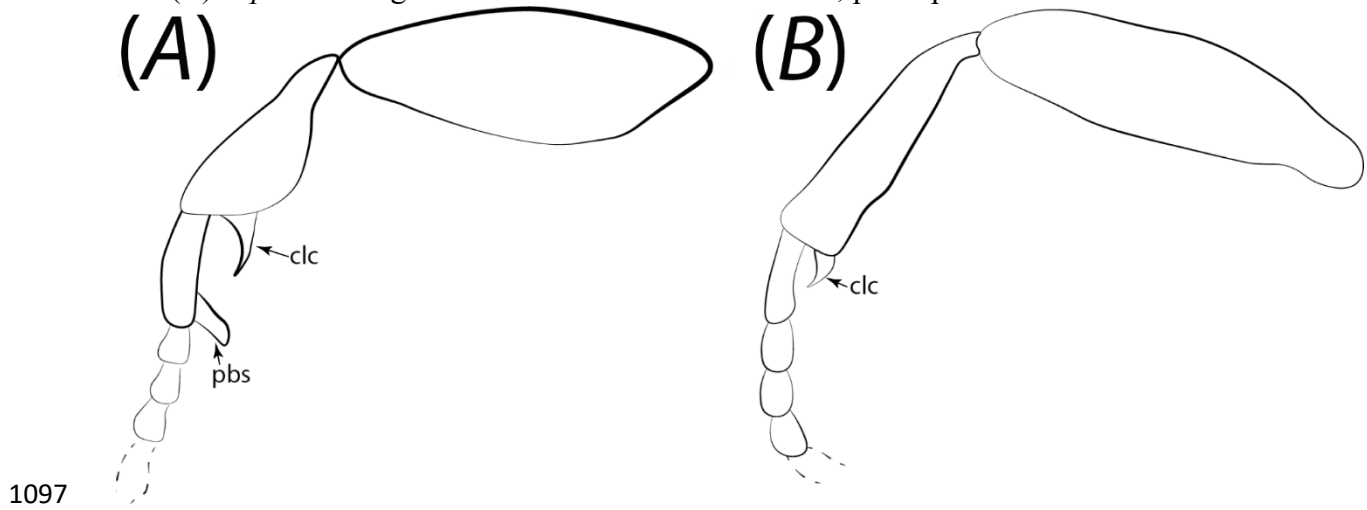

Phylogeny of the Male-Based Ant Genus *Phaulomyrma*

1098 Fig. 11. Lectotype of *Phaulomyrma javana* as designated by this study (MCZ:Ent:31142). (A)  
1099 Full-face view; (B) profile view of mesosoma; (C) forewing; (D) metasoma and genitalia. Scale  
1100 bar = 0.2 mm.

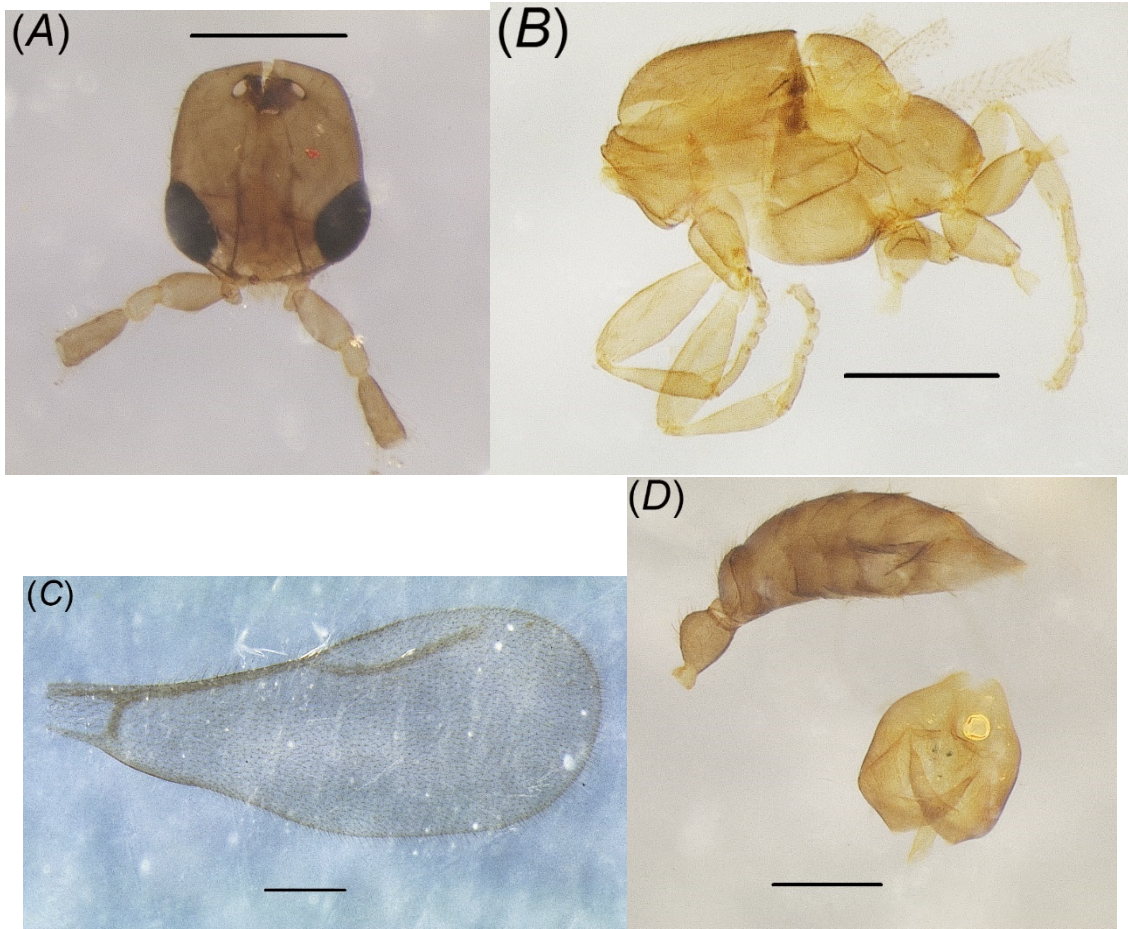



Phylogeny of the Male-Based Ant Genus *Phaulomyrma*

1103 Fig. 12. Mandible of (A) *Yavnella* cf. *indica* (CASENT0106377) and (B) *Leptanilla* zhg-my03  
1104 (CASENT0842618). Scale bar A=0.03 mm.; B=0.05 mm.

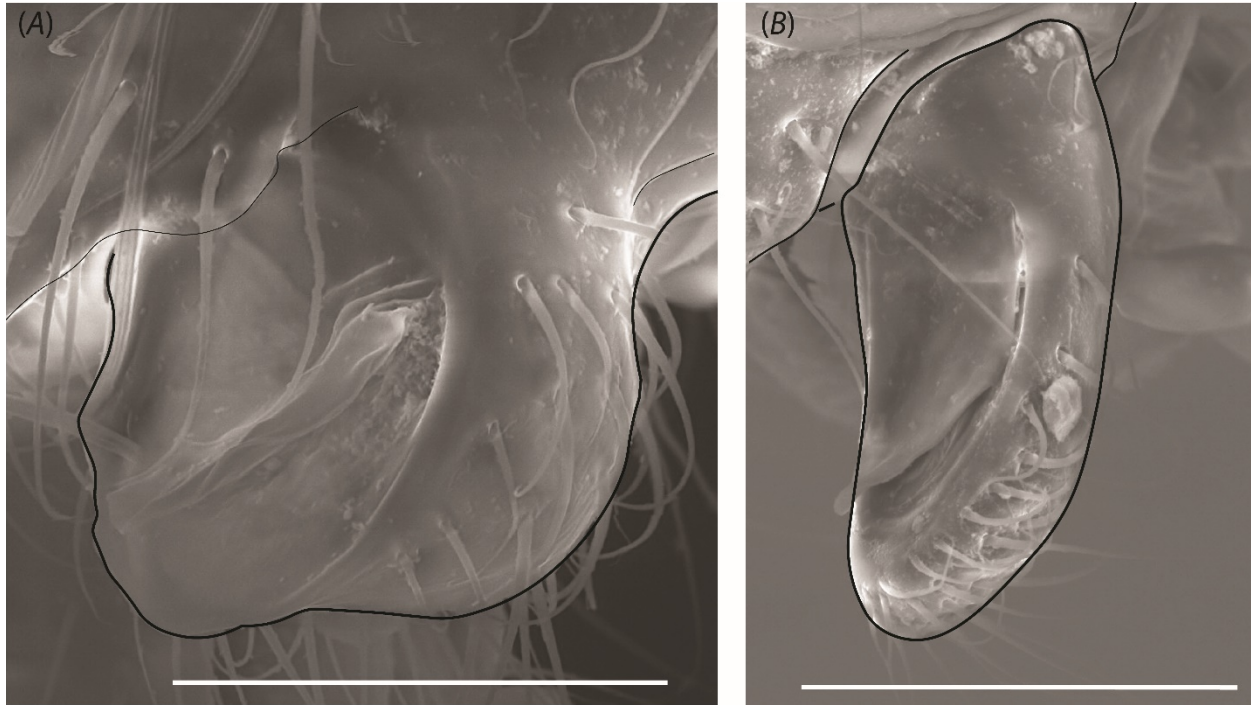

1105  
1106

Phylogeny of the Male-Based Ant Genus *Phaulomyrma*

1107 Fig. 13. Full-face view of *Yavnella* TH02 (CASENT0119531; Michele Esposito), with ocellar  
1108 tubercle marked. Scale bar=0.1 mm.

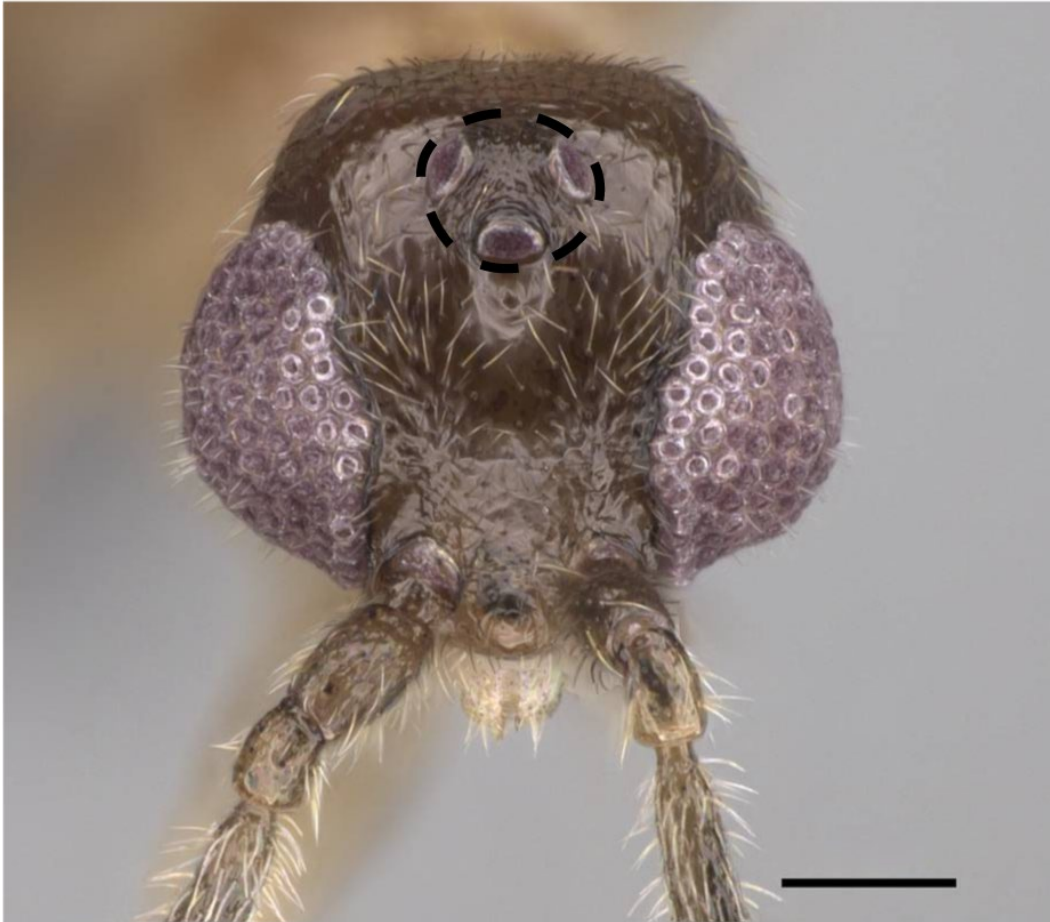

1109  
1110

Phylogeny of the Male-Based Ant Genus *Phaulomyrma*

1111 Fig. 14. Profile of pronotum (black) and mesoscutum (blue) in male Leptanillini. (A) *Yavnella*  
1112 zhg-bt01 (CASENT0106384); (B) *Noonilla* zhg-my04 (CASENT0842610; not sequenced in this  
1113 study); (C) *Leptanilla* (Bornean morphospecies-group) zhg-my03 (CASENT0106416).

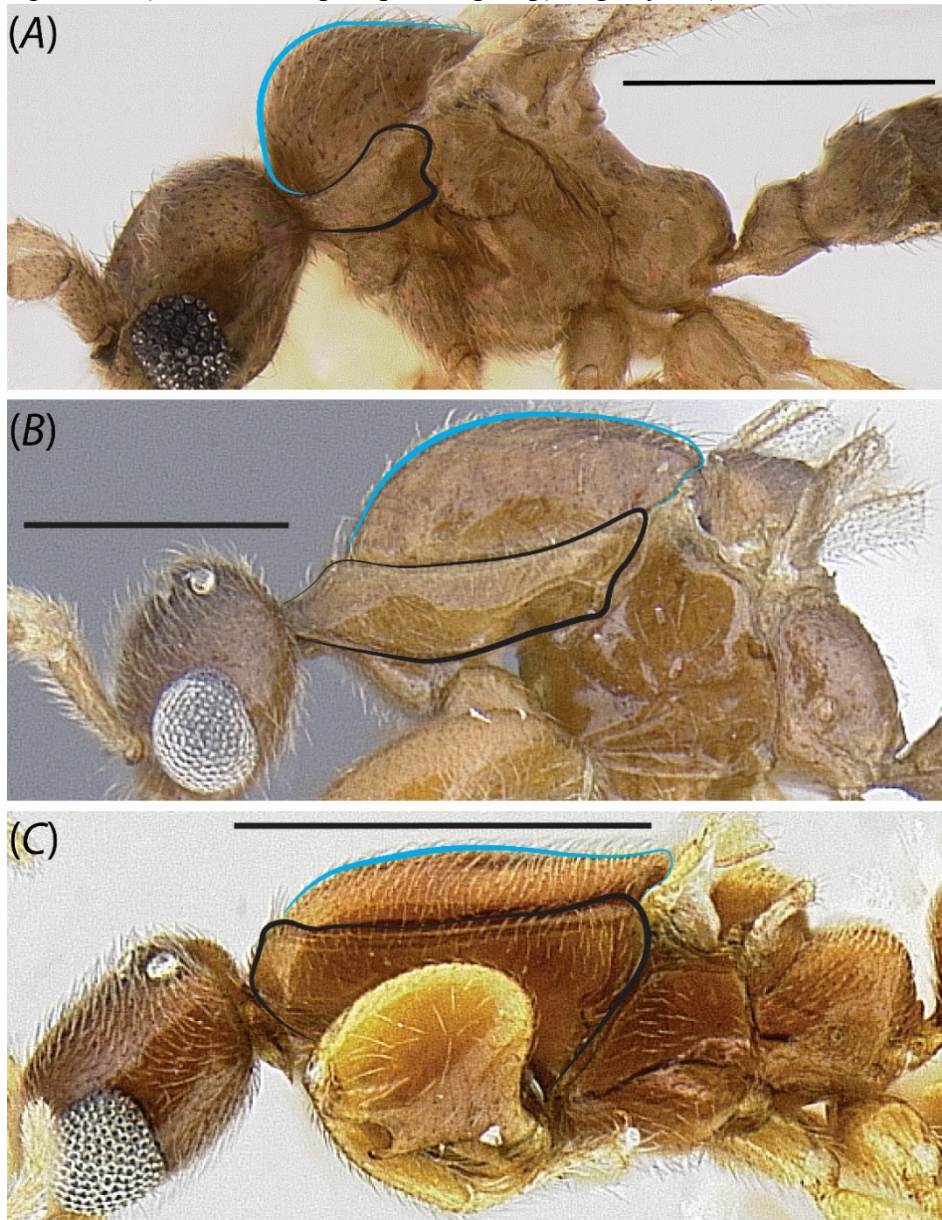

1114



Phylogeny of the Male-Based Ant Genus *Phaulomyrma*

1115 Fig. 15. Examples of male forewing venation across the Leptanillinae. (A) *Yavnella* zhg-bt01  
1116 (CASENT0106384); (B) *Protanilla* zhg-vn01 (CASENT0842613); (C) *Leptanilla* (Bornean  
1117 morphospecies-group) zhg-my05 (CASENT0842571).

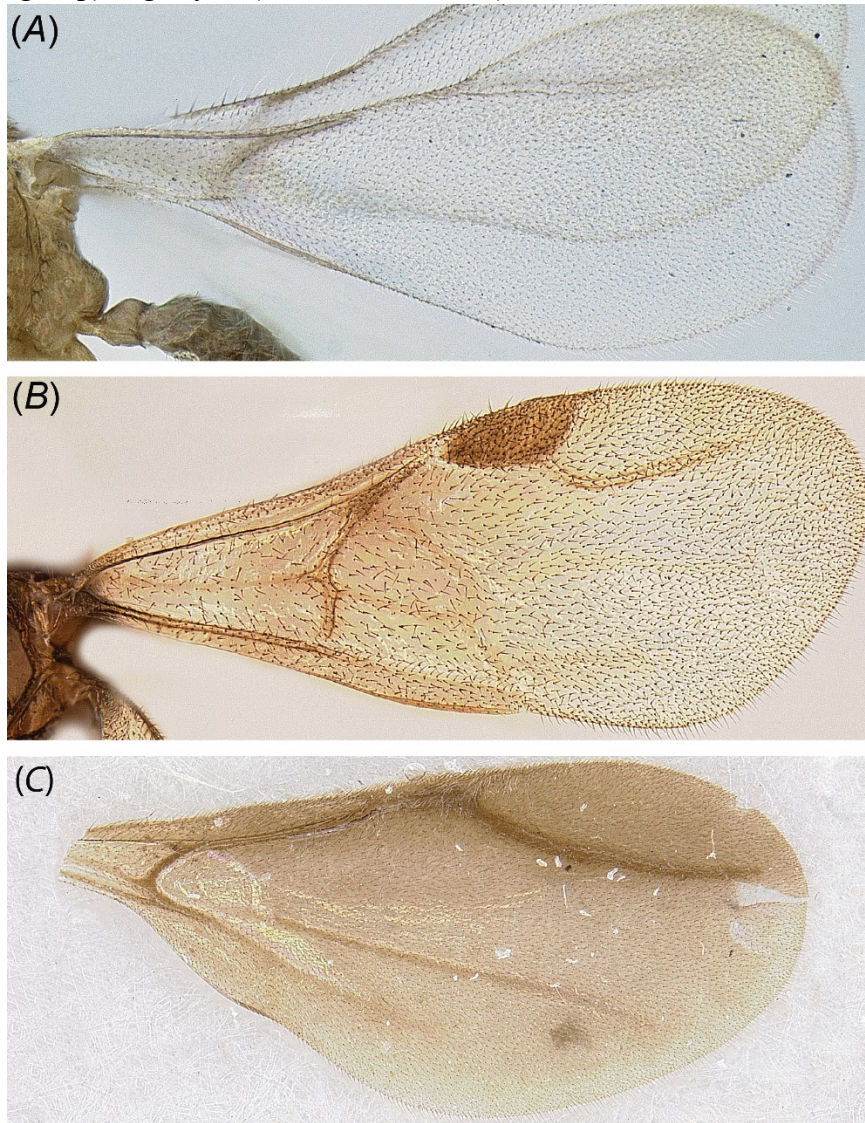

1118

Phylogeny of the Male-Based Ant Genus *Phaulomyrma*

1119 Fig. 16. Foreleg of (A) *Yavnella argamani* (CASENT0235253) and (B) *Leptanilla zhg-id01*  
1120 (CASENT0842626; not sequenced in this study). Scale bar=0.3 mm.

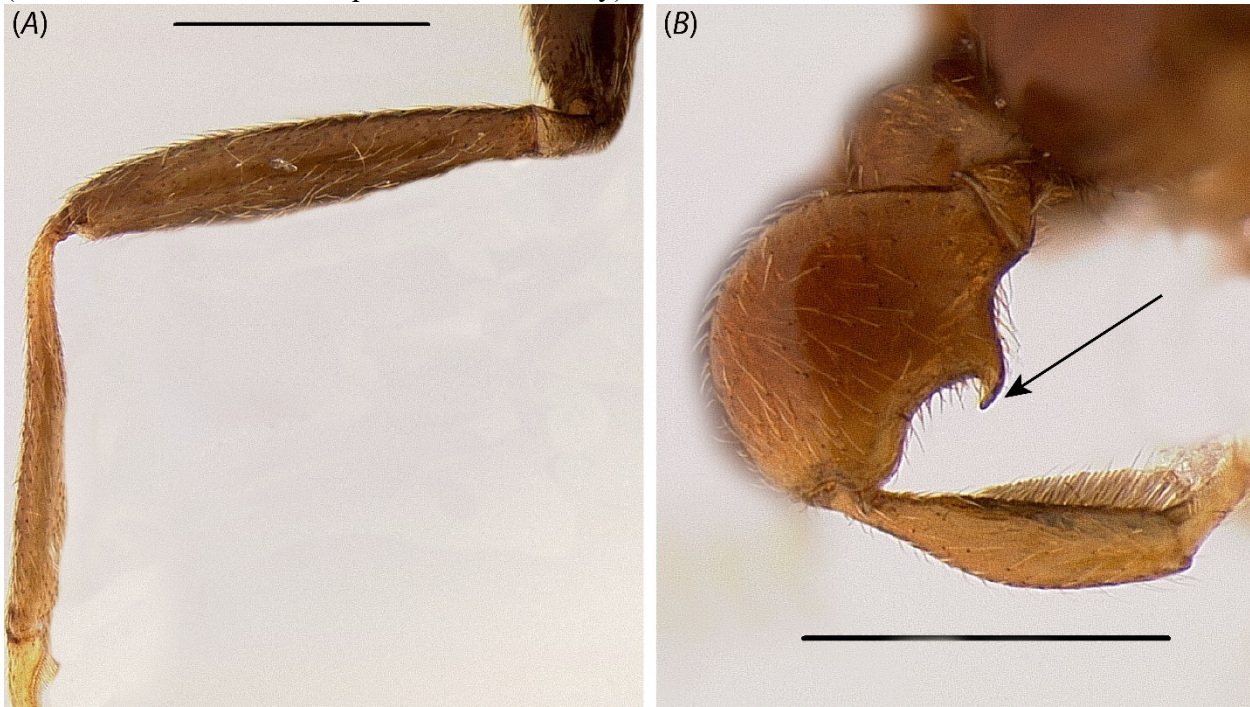

1121



Phylogeny of the Male-Based Ant Genus *Phaulomyrma*

1122 Fig. 17. Posterior view of abdominal tergite VIII in male Leptanillini. (A) *Yavnella* zhg-th01  
1123 (CASENT0842620) and (B) *Noonilla* zhg-my02 (CASENT0842592). Scale bar = 0.3 mm.

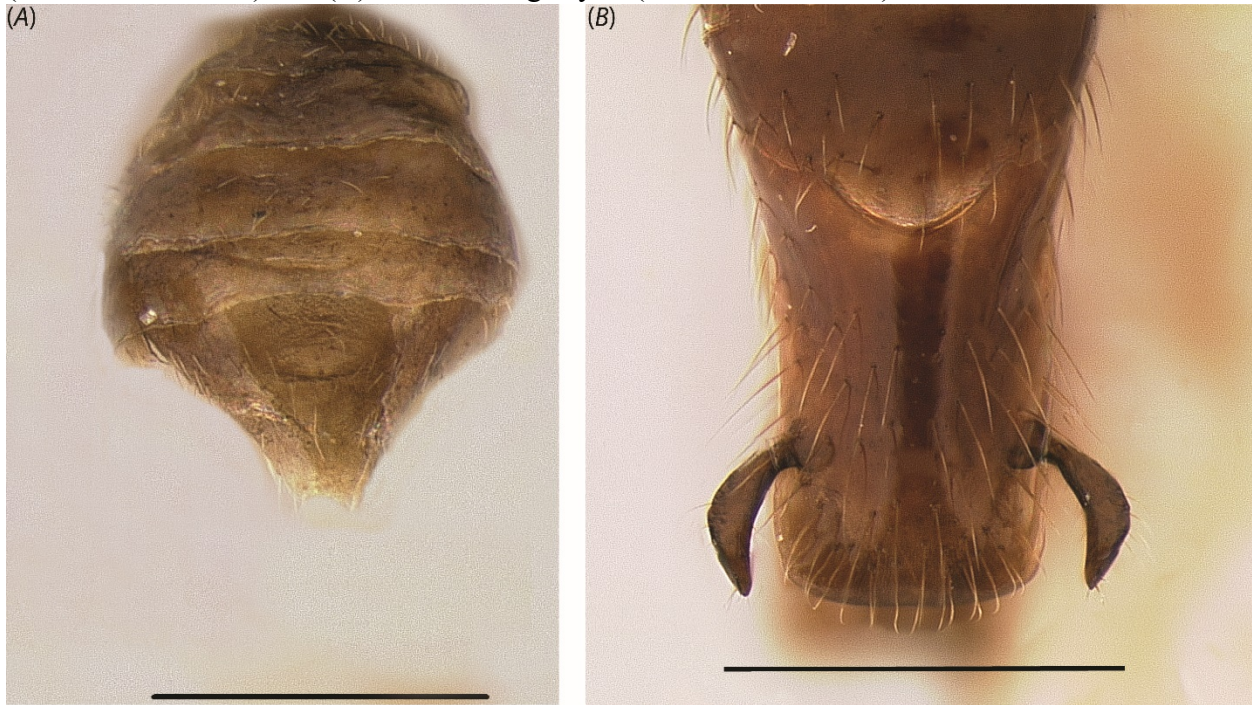

1124

Phylogeny of the Male-Based Ant Genus *Phaulomyrma*

1125 Fig. 18. Gonopodite and volsella (*vol*) of *Leptanilla africana*, sketched after Baroni Urbani  
1126 (1977: Fig. 37) by M. K. Lippey. Top of image is distal to body.

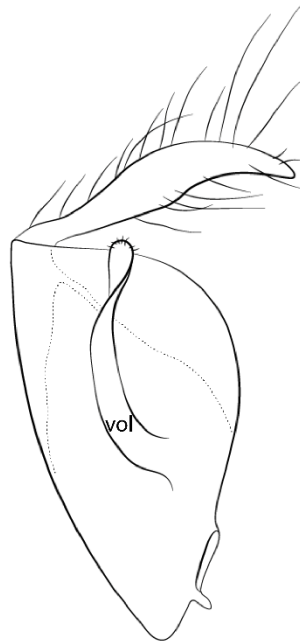

1127

Phylogeny of the Male-Based Ant Genus *Phaulomyrma*

1128 Fig. 19. Dorsoposterior view of phallotreme in (A) *Leptanilla* zhg-my04 (CASENT0842553);  
1129 ventroposterior view of phallotreme in (B) *Leptanilla* zhg-my05 (CASENT0106432). Scale bar  
1130 A = 0.3 mm.; B = 0.4 mm.

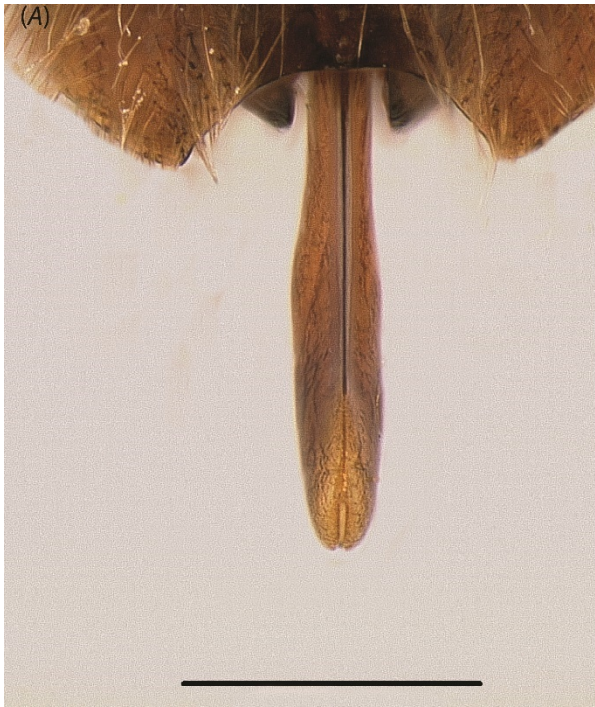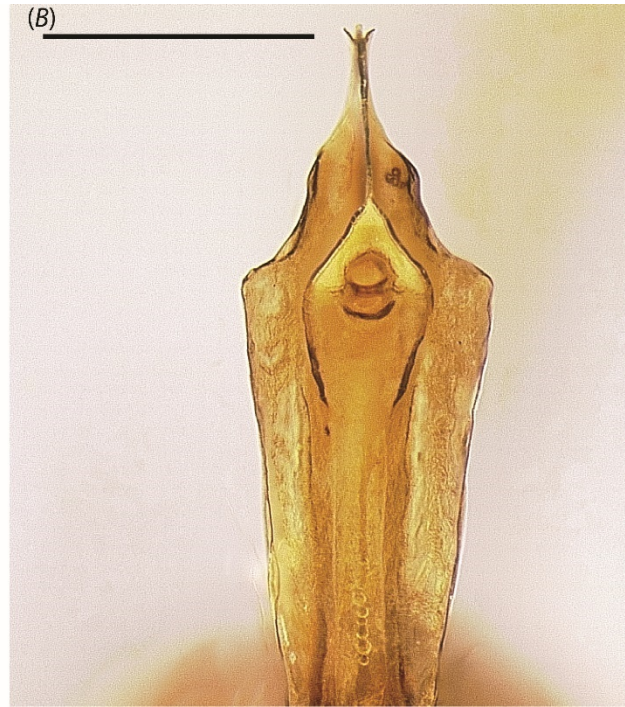

1131



Phylogeny of the Male-Based Ant Genus *Phaulomyrma*

1132 Fig. 20. Mesal view of protibia of (A) *Protanilla* zhg-vn01 (CASENT0106382) and (B) *Noonilla*  
1133 zhg-my01 (CASENT0842587; not sequenced in this study). Scale bar = 0.3 mm.

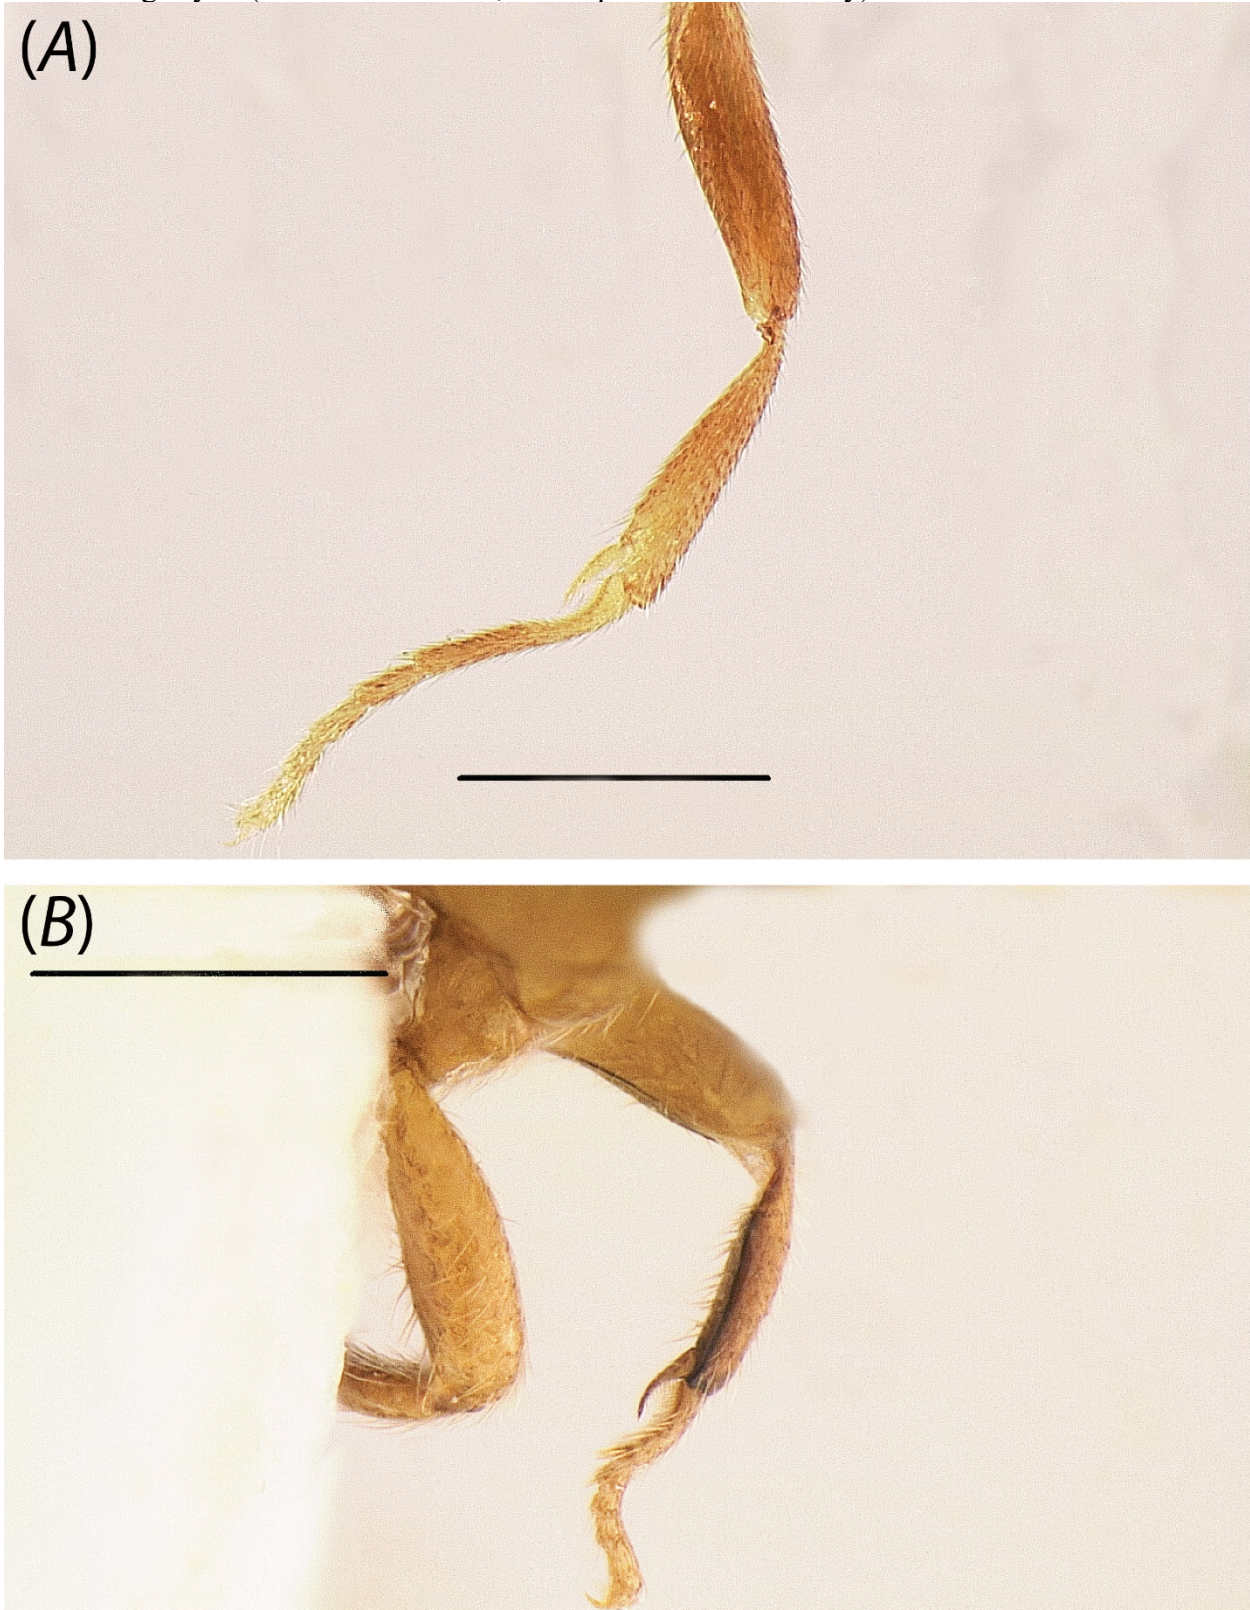

1134



Phylogeny of the Male-Based Ant Genus *Phaulomyrma*

1135 Fig. 21. Foreleg of (A) *Yavnella argamani* (CASENT0235253) and (B) *Leptanilla zhg-id01*  
1136 (CASENT0842626; not sequenced in this study). Scale bar = 0.3 mm.

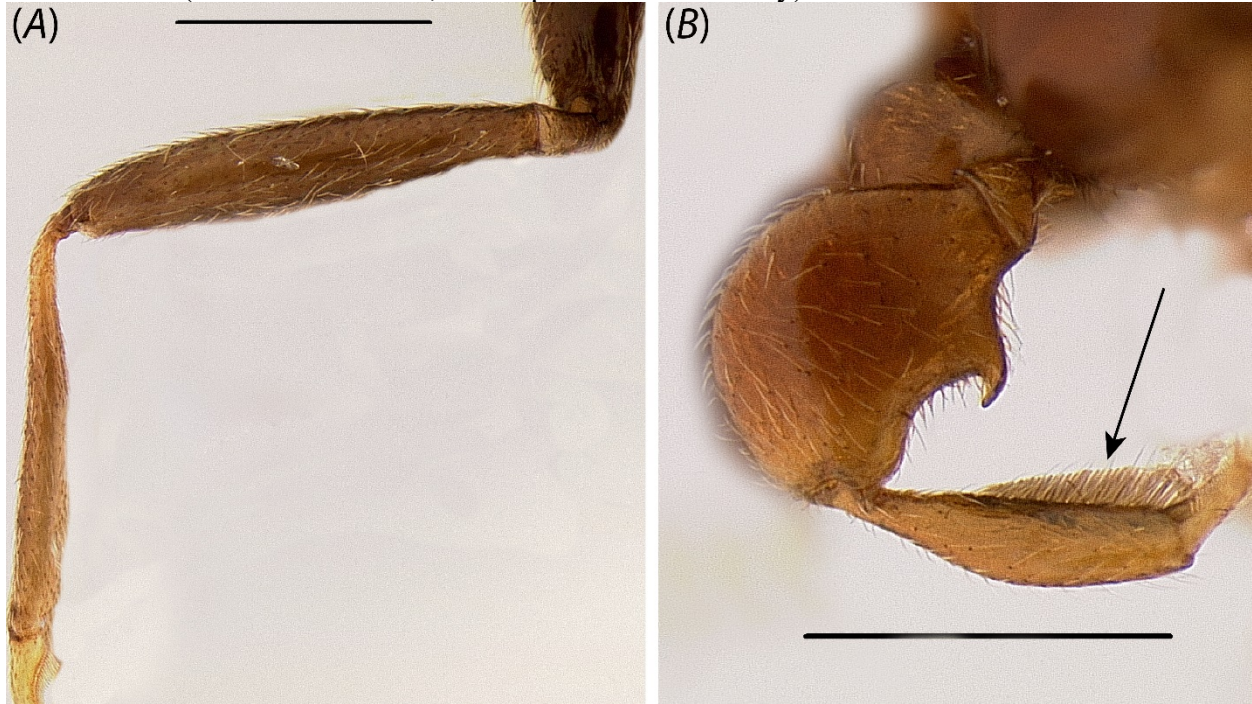

1137

Phylogeny of the Male-Based Ant Genus *Phaulomyrma*

1138 Fig. 22. Full-face views of (A) *Yavnella* TH08 (CASENT0119531; Michele Esposito) and (B)  
1139 *Yavnella* TH02 (CASENT0227555; Shannon Hartman). Scale bar = 0.1 mm.

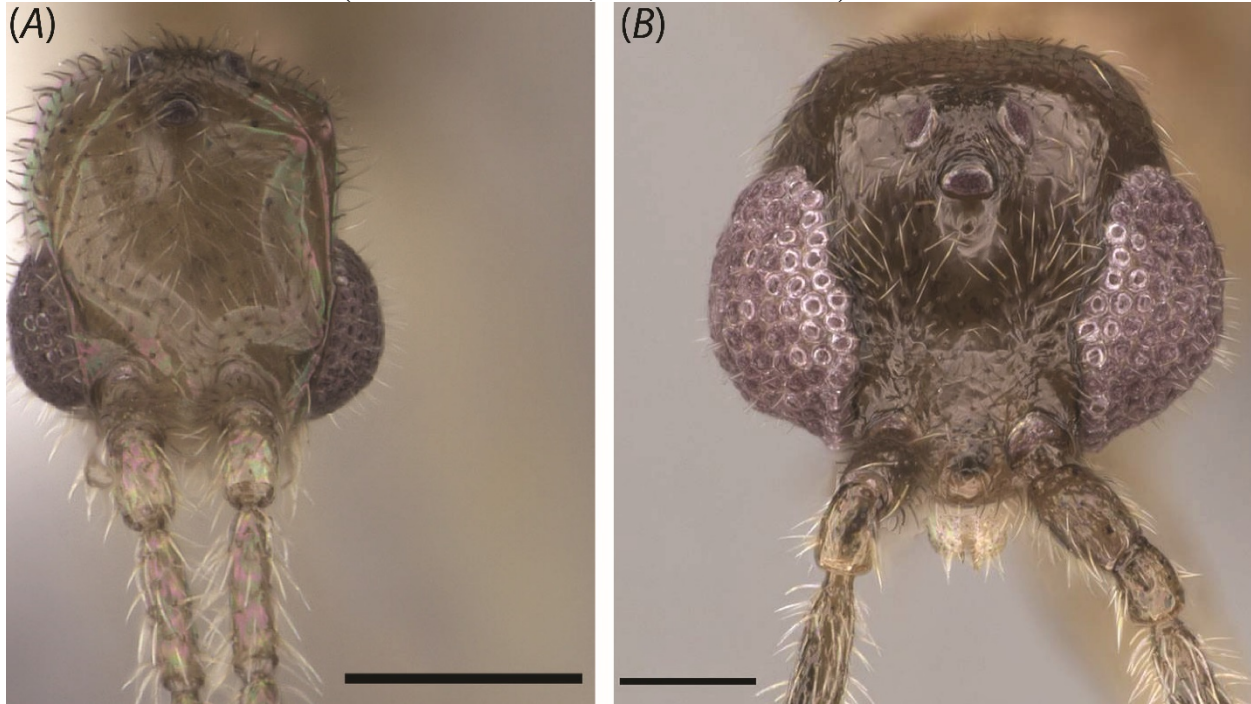



Phylogeny of the Male-Based Ant Genus *Phaulomyrma*

1141 Fig. 23. Full-face views of (A) *Leptanilla* zhg-my04 (CASENT0842558) and (B) *Protanilla*  
1142 TH01 (CASENT0119776; Michele Esposito). Scale bar A = 0.1 mm.; B = 0.2 mm.

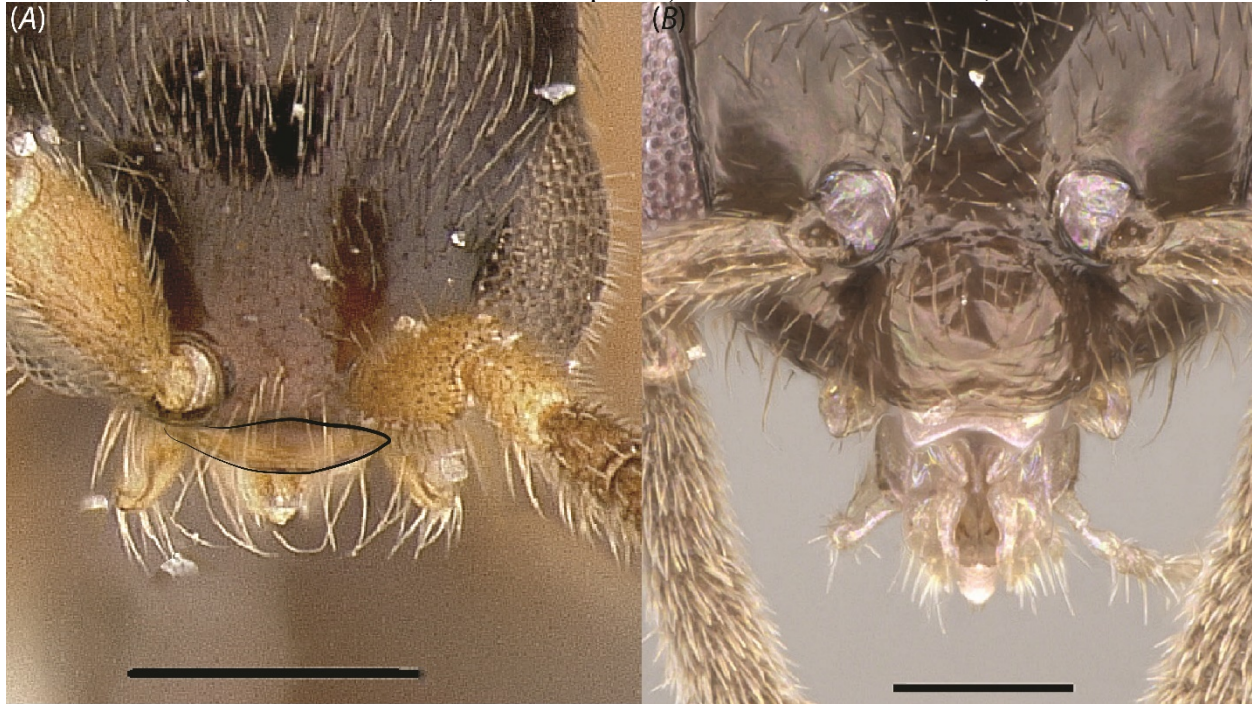

1143

1144

Phylogeny of the Male-Based Ant Genus *Phaulomyrma*

1145 Fig. 24. Full-face views of (A) *Leptanilla* zhg-my03 (CASENT084545) and (B) *Protanilla* TH01  
1146 (CASENT0119776; Michele Esposito). Scale bar A = 0.1 mm.; B = 0.2 mm.

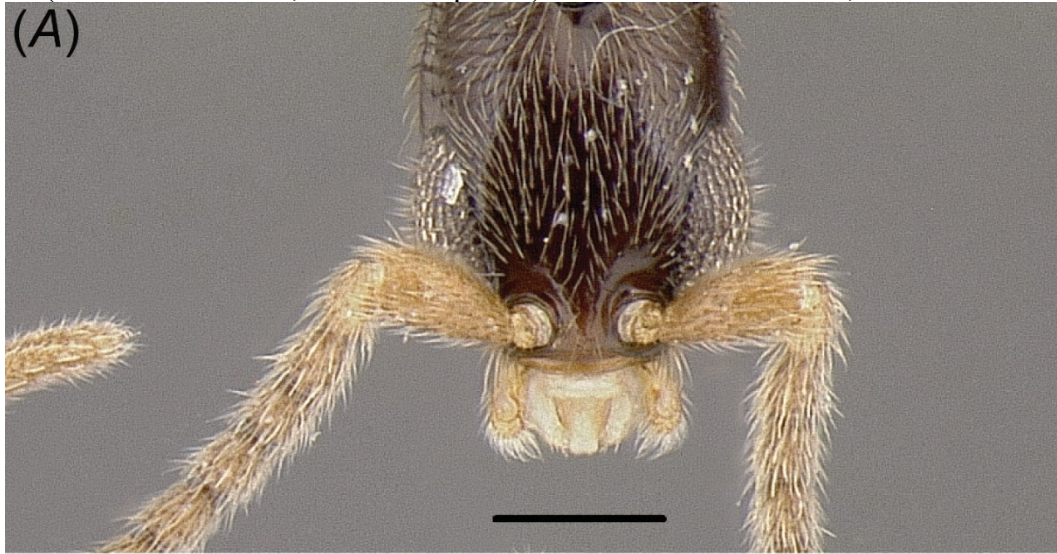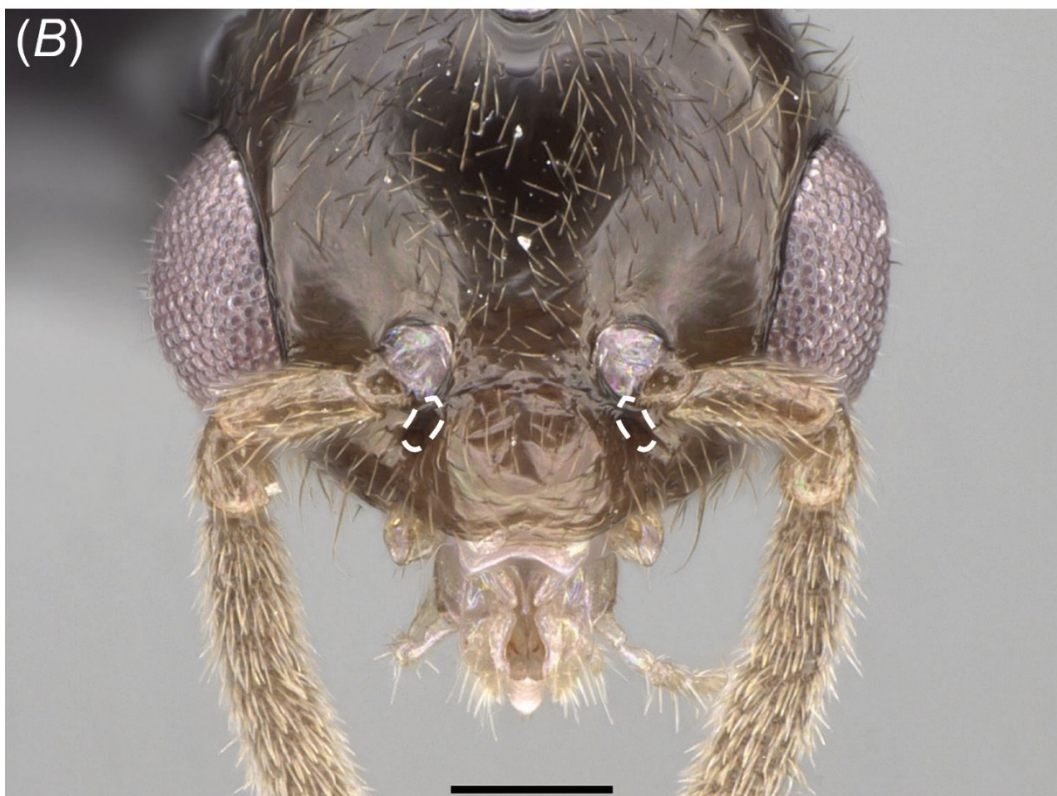

1147

1148



Phylogeny of the Male-Based Ant Genus *Phaulomyrma*

1149  
1150

Fig. 25. Full-face views of (A) *Leptanilla* zhg-my04 (CASENT0842548) and (B) *Yavnella* argamani (CASENT0235253; Shannon Hartman). Scale bar A = 0.3 mm.; B = 0.1 mm.

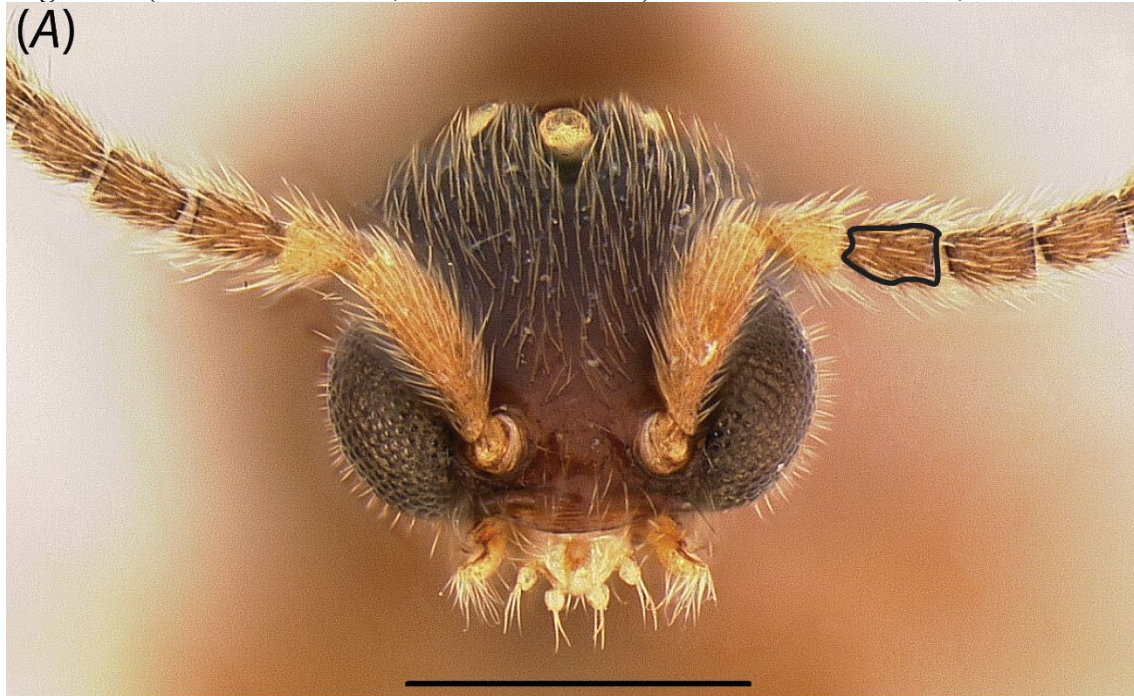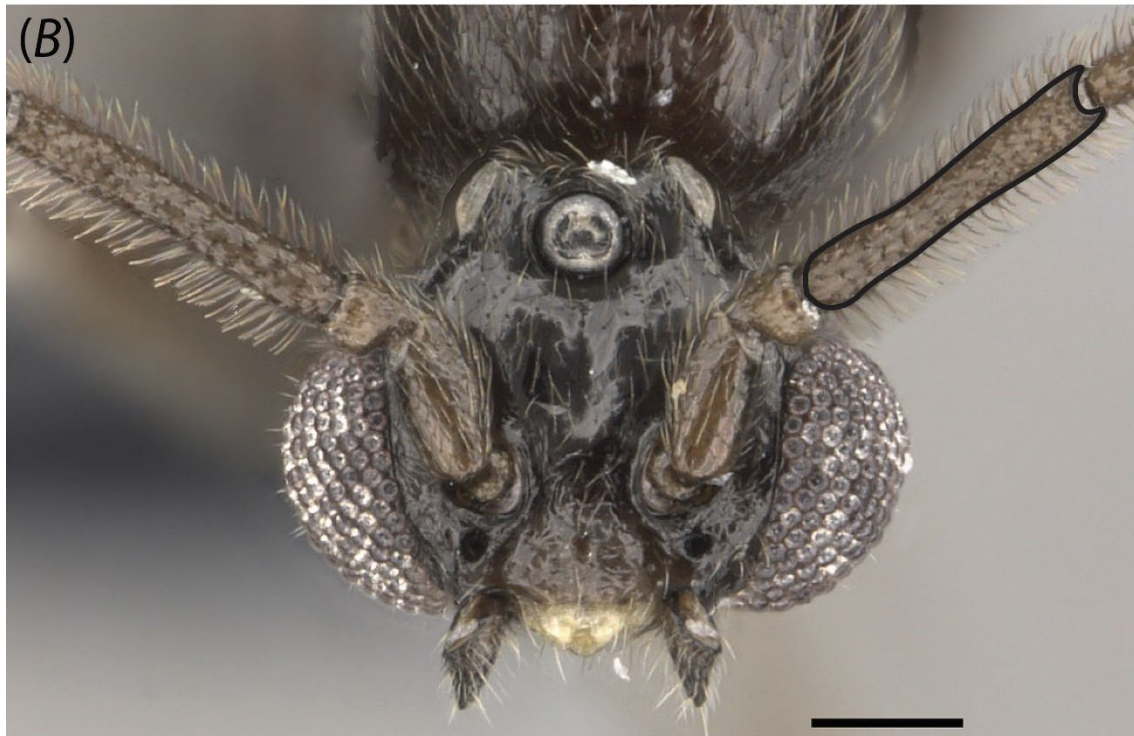

1151  
1152



Phylogeny of the Male-Based Ant Genus *Phaulomyrma*

1153 Fig. 26. Dorsal view of occipital margin in (A) *Leptanilla* TH09 (CASENT0842664) and (B)  
1154 *Leptanilla* TH01 (CASENT0119792; April Nobile). Scale bar A = 0.3 mm.; B = 0.2 mm.

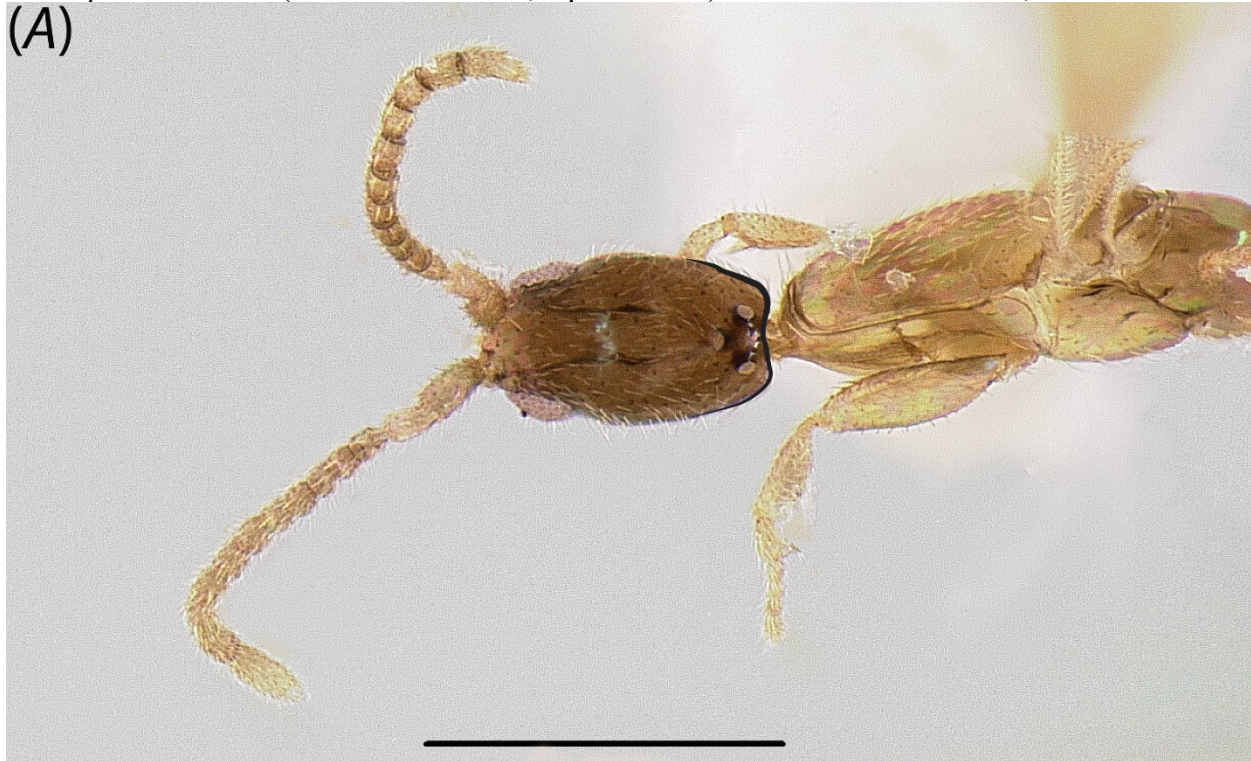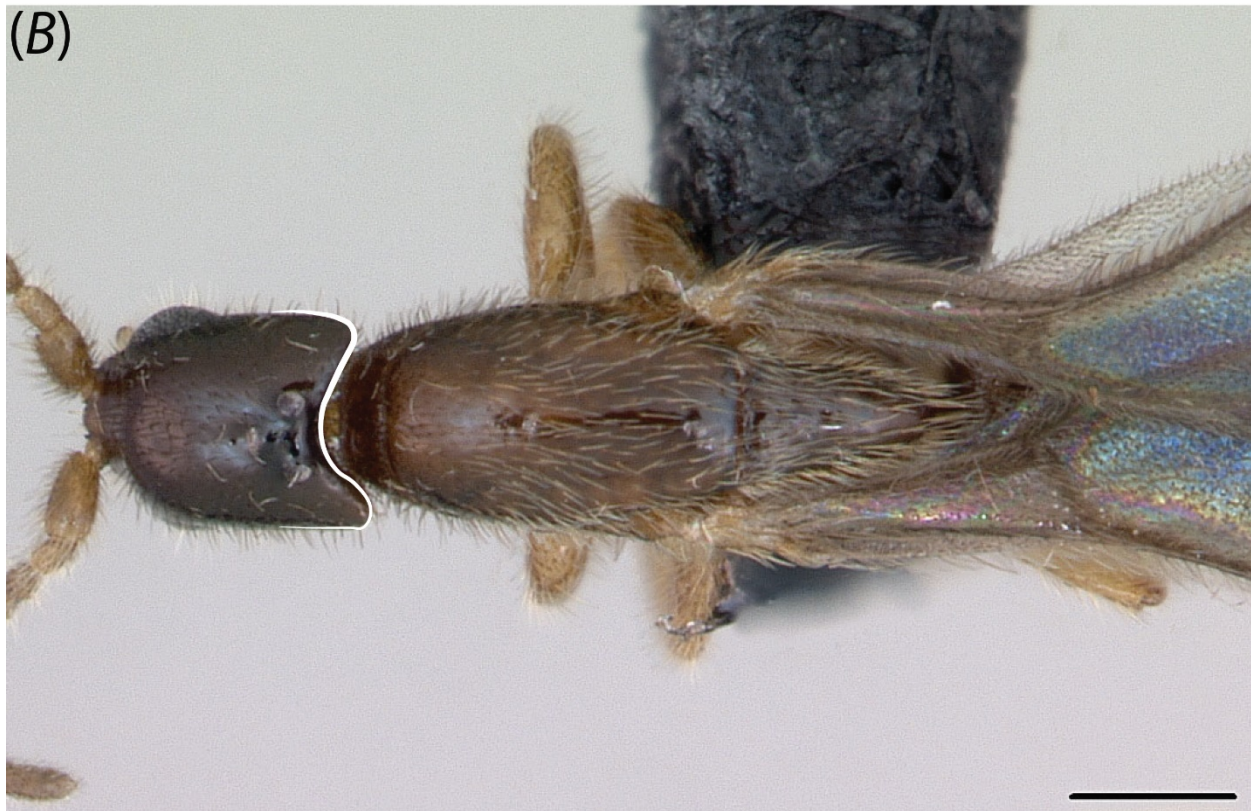

1155



Phylogeny of the Male-Based Ant Genus *Phaulomyrma*

1156  
1157

Fig. 27. Profile view of mesosoma in (A) *Leptanilla* zhg-my02 (CASENT0106416) and (B) *Yavnella* zhg-th01 (CASENT0842621). Scale bar A = 0.5 mm.; B = 0.3 mm.

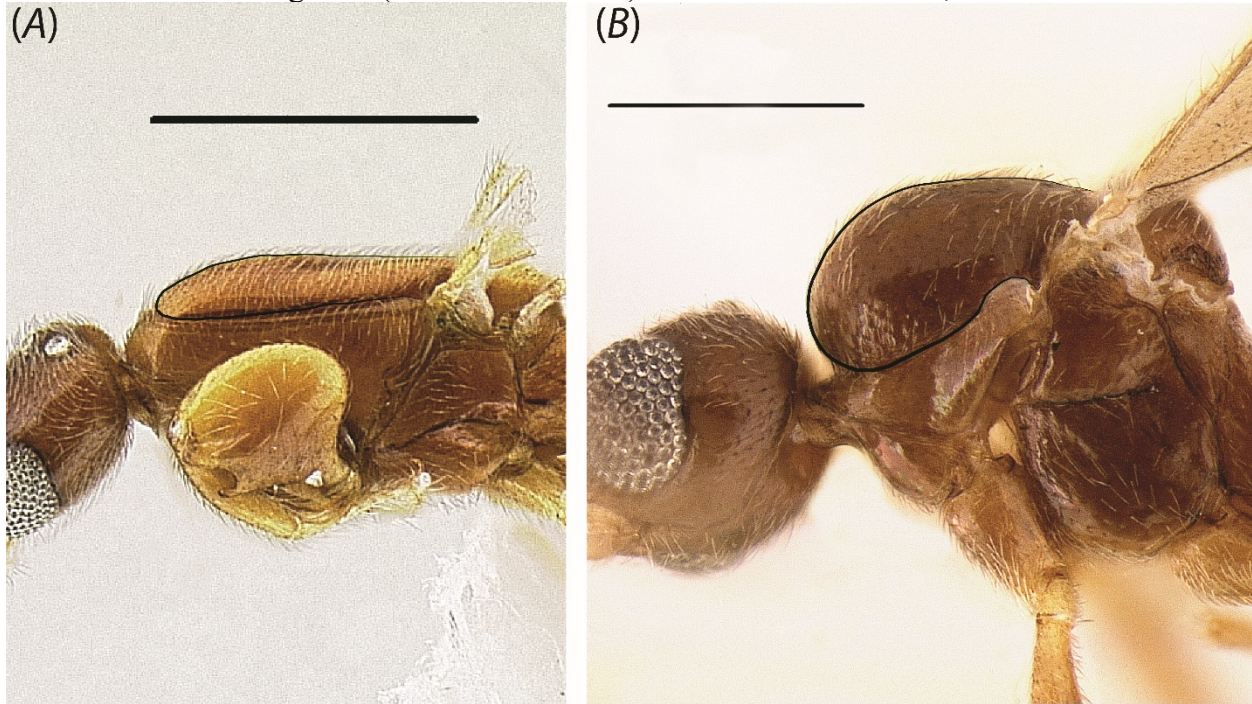

1158  
1159

Phylogeny of the Male-Based Ant Genus *Phaulomyrma*

1160 Fig. 28. Dorsal view of (A) *Leptanilla* TH01 (CASENT0119776; April Nobile) and (B)  
1161 *Protanilla* TH03 (CASENT0119791; Erin Prado). Scale bar A = 0.2 mm.; B = 1 mm.

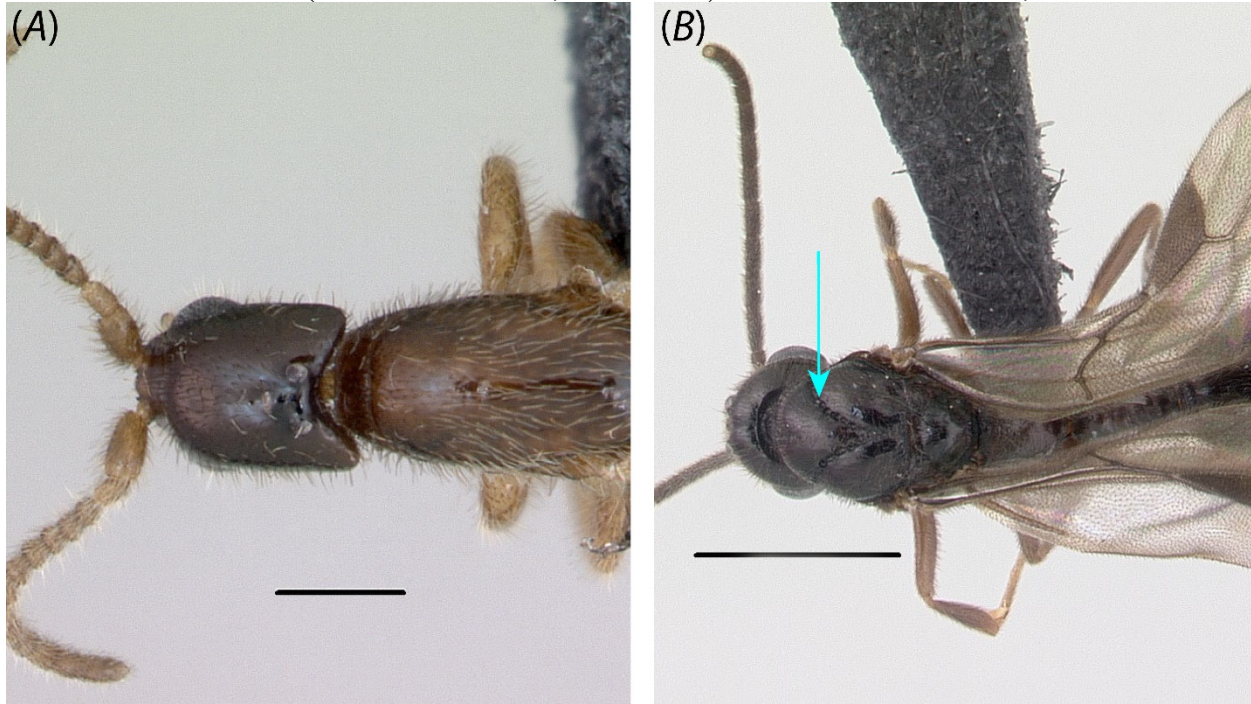

1162

1163



Phylogeny of the Male-Based Ant Genus *Phaulomyrma*

1164 Fig. 29. Dorsal view of (A) *Leptanilla* zhg-au01 (CASENT0758873; not sequenced in this study)  
1165 and (B) *Leptanilla* zhg-my04 (CASENT0842558). Scale bar A = 1 mm.; B = 0.5 mm.

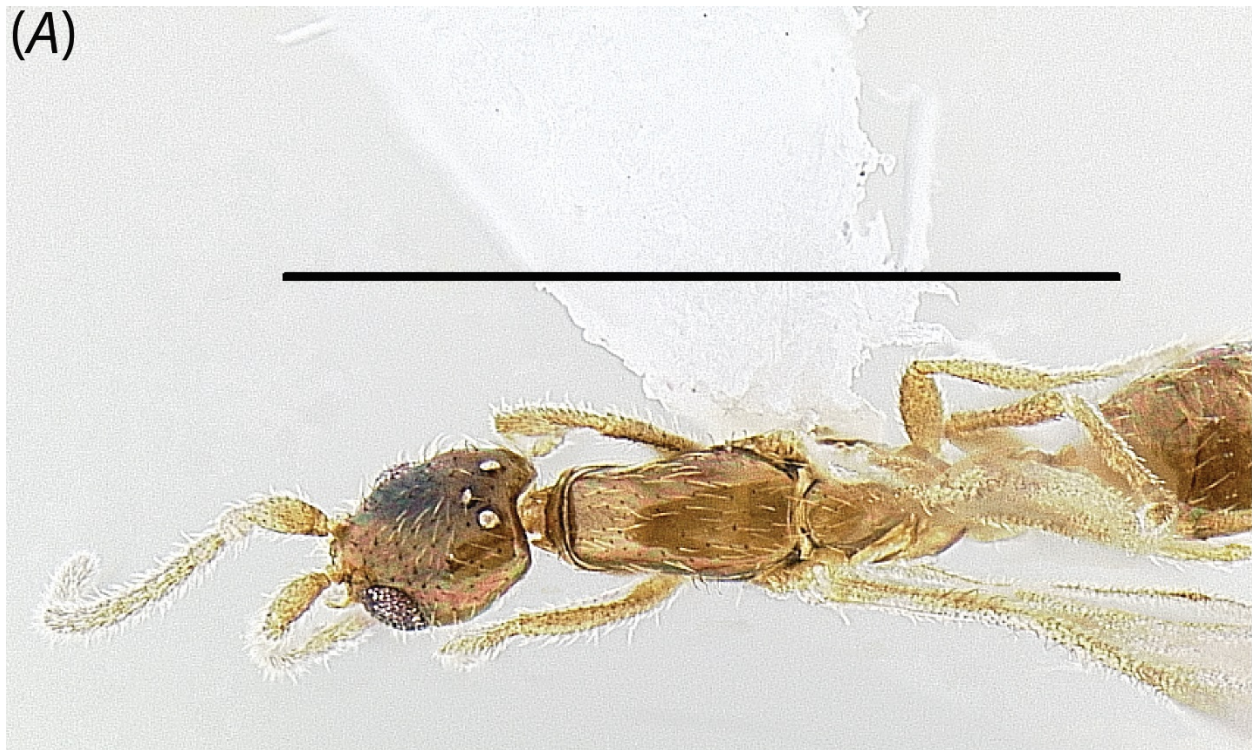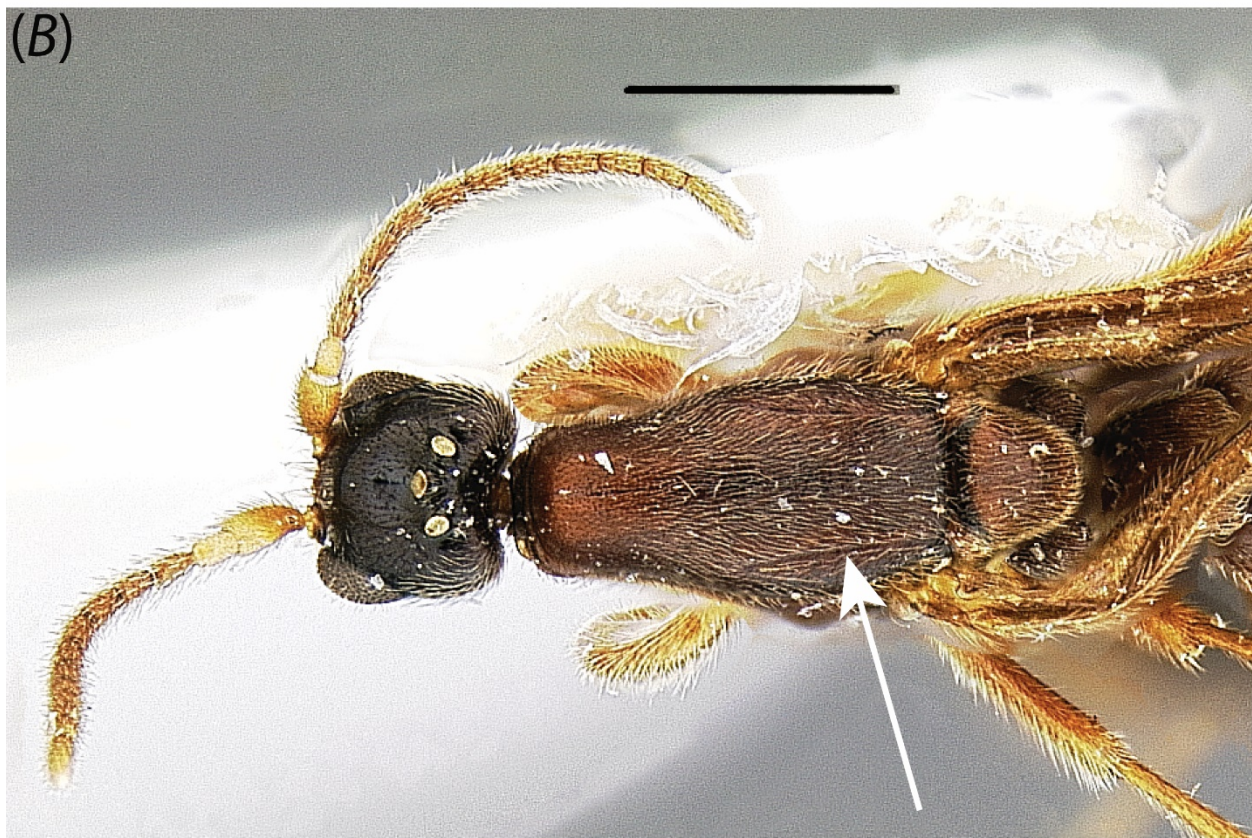

1166



Phylogeny of the Male-Based Ant Genus *Phaulomyrma*

1167 Fig. 30. Profile view of mesosoma in (A) *Yavnella* TH02 (CASENT0119531; Michele Esposito)  
1168 and (B) *Protanilla* zhg-vn01 (CASENT0842656). Scale bar A = 0.2 mm.; B = 0.3 mm.

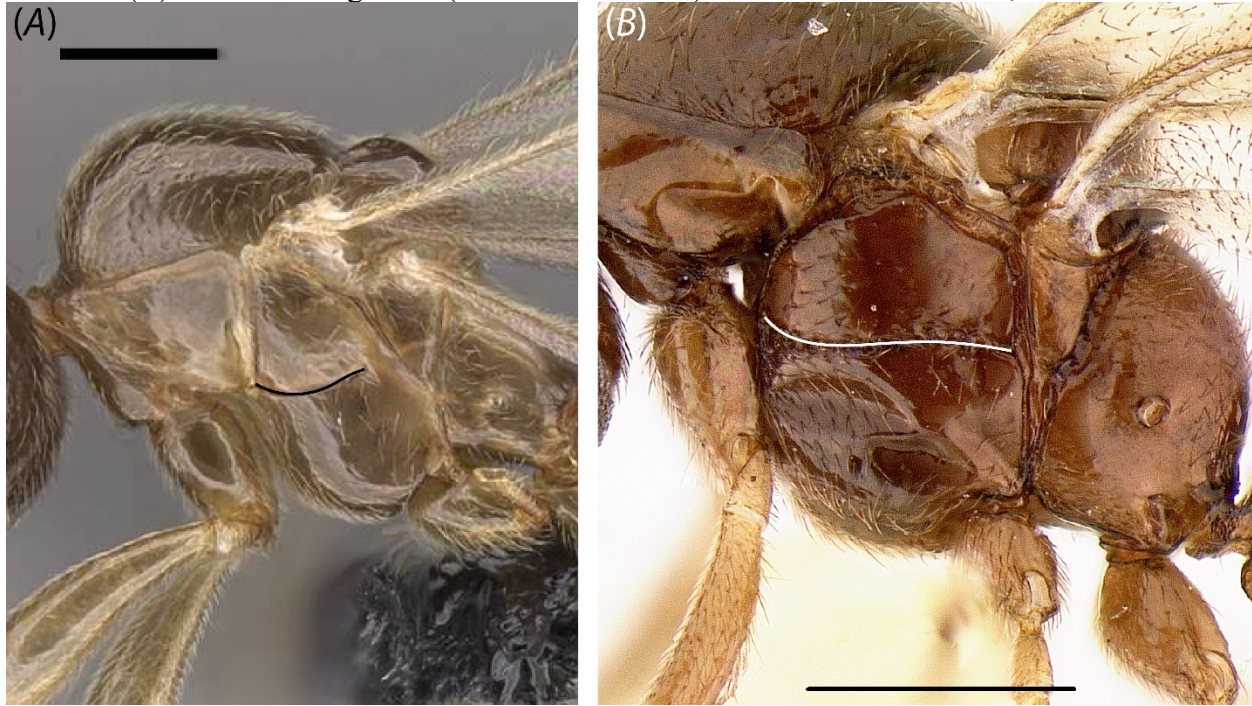

1169

1170



Phylogeny of the Male-Based Ant Genus *Phaulomyrma*

1171 Fig. 31. Forewing of (A) *Phaulomyrma javana* (MCZ:Ent:31142) and (B) *Protanilla zhg-vn01*  
1172 (CASENT0842613). Scale bar A = 0.2 mm.; B = 0.5 mm.

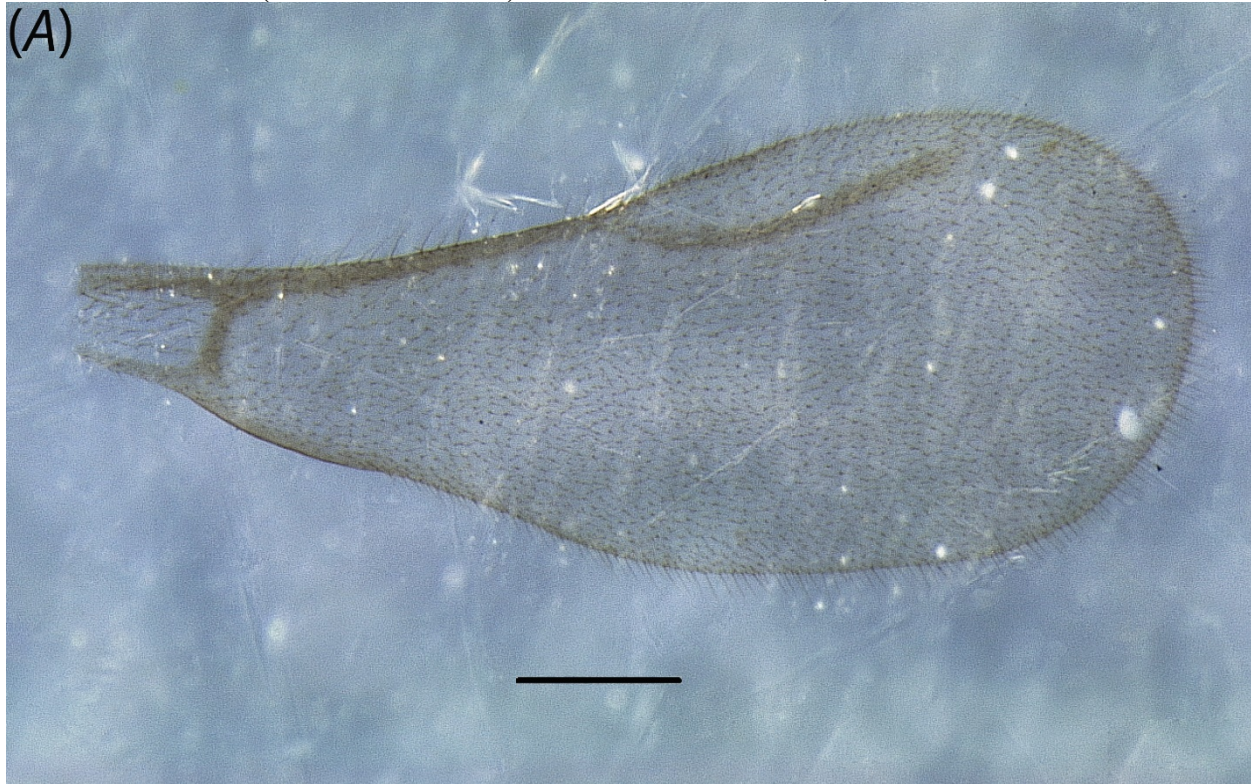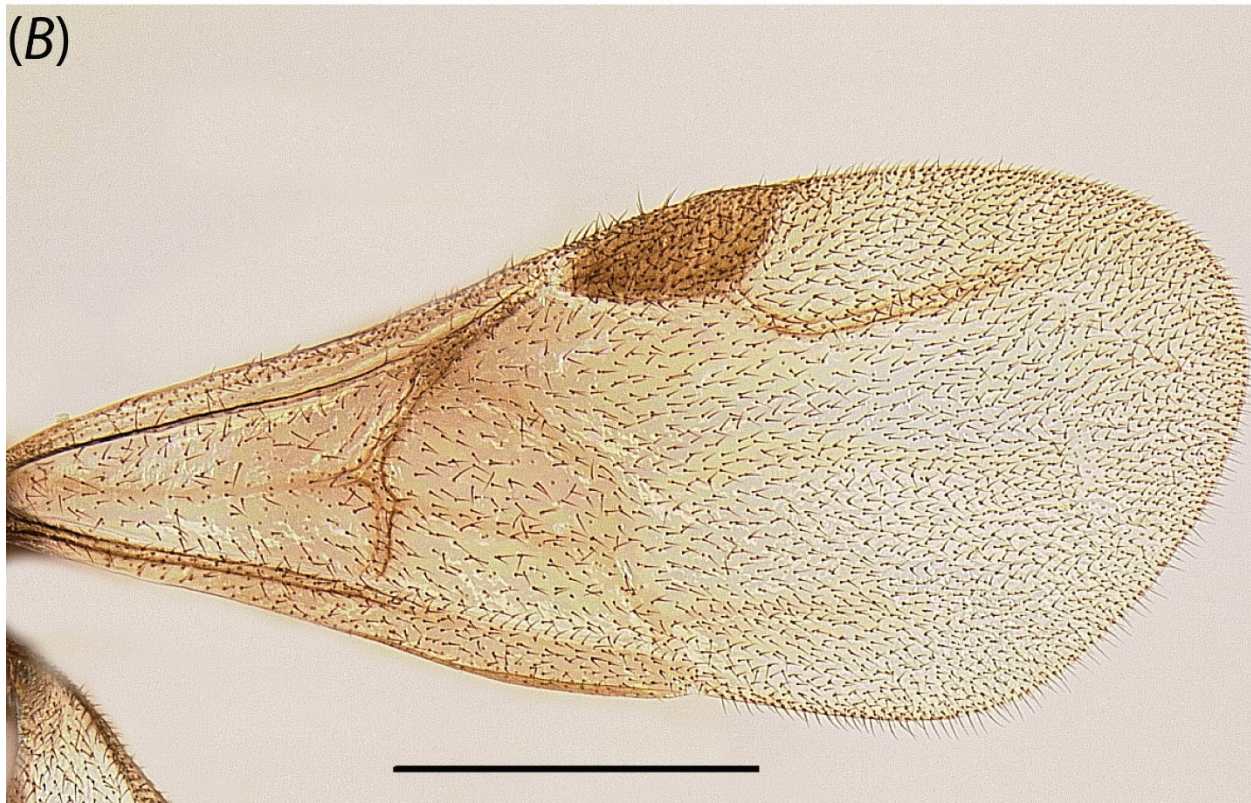

1173



Phylogeny of the Male-Based Ant Genus *Phaulomyrma*

1174 Fig. 32. Dorsal view of mesosoma in (A) *Protanilla* zhg-vn01 (CASENT0842613) and (B)  
1175 *Leptanilla* zhg-my04 (CASENT0842548). Scale bar = 0.3 mm.

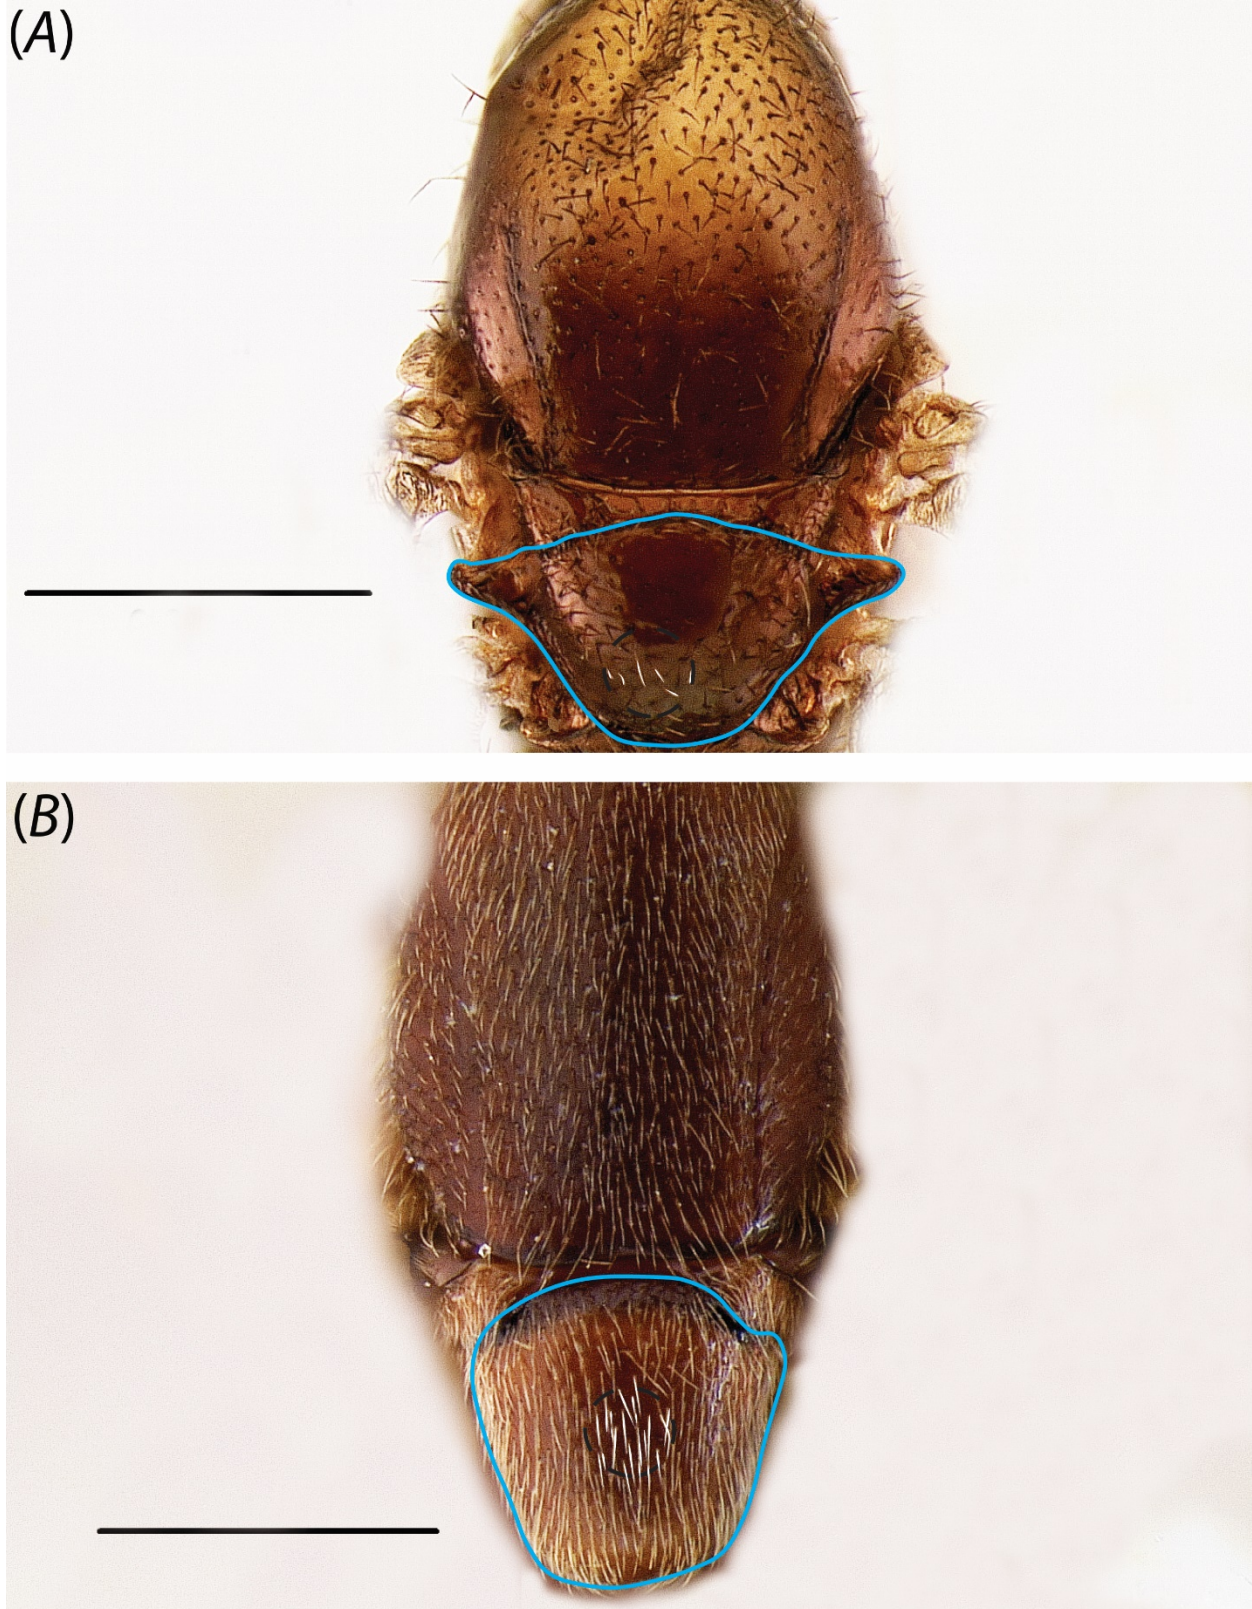

1176



Phylogeny of the Male-Based Ant Genus *Phaulomyrma*

1177 Fig. 33. Profile view of petiole in (A) *Yavnella* zhg-bt01 (CASENT0106384) and (B) *Protanilla*  
1178 *lini* (OKENT0011097; male described by Griebenow, in press) (not sequenced in this study).  
1179 Scale bar A = 0.3 mm.; B = 0.5 mm.

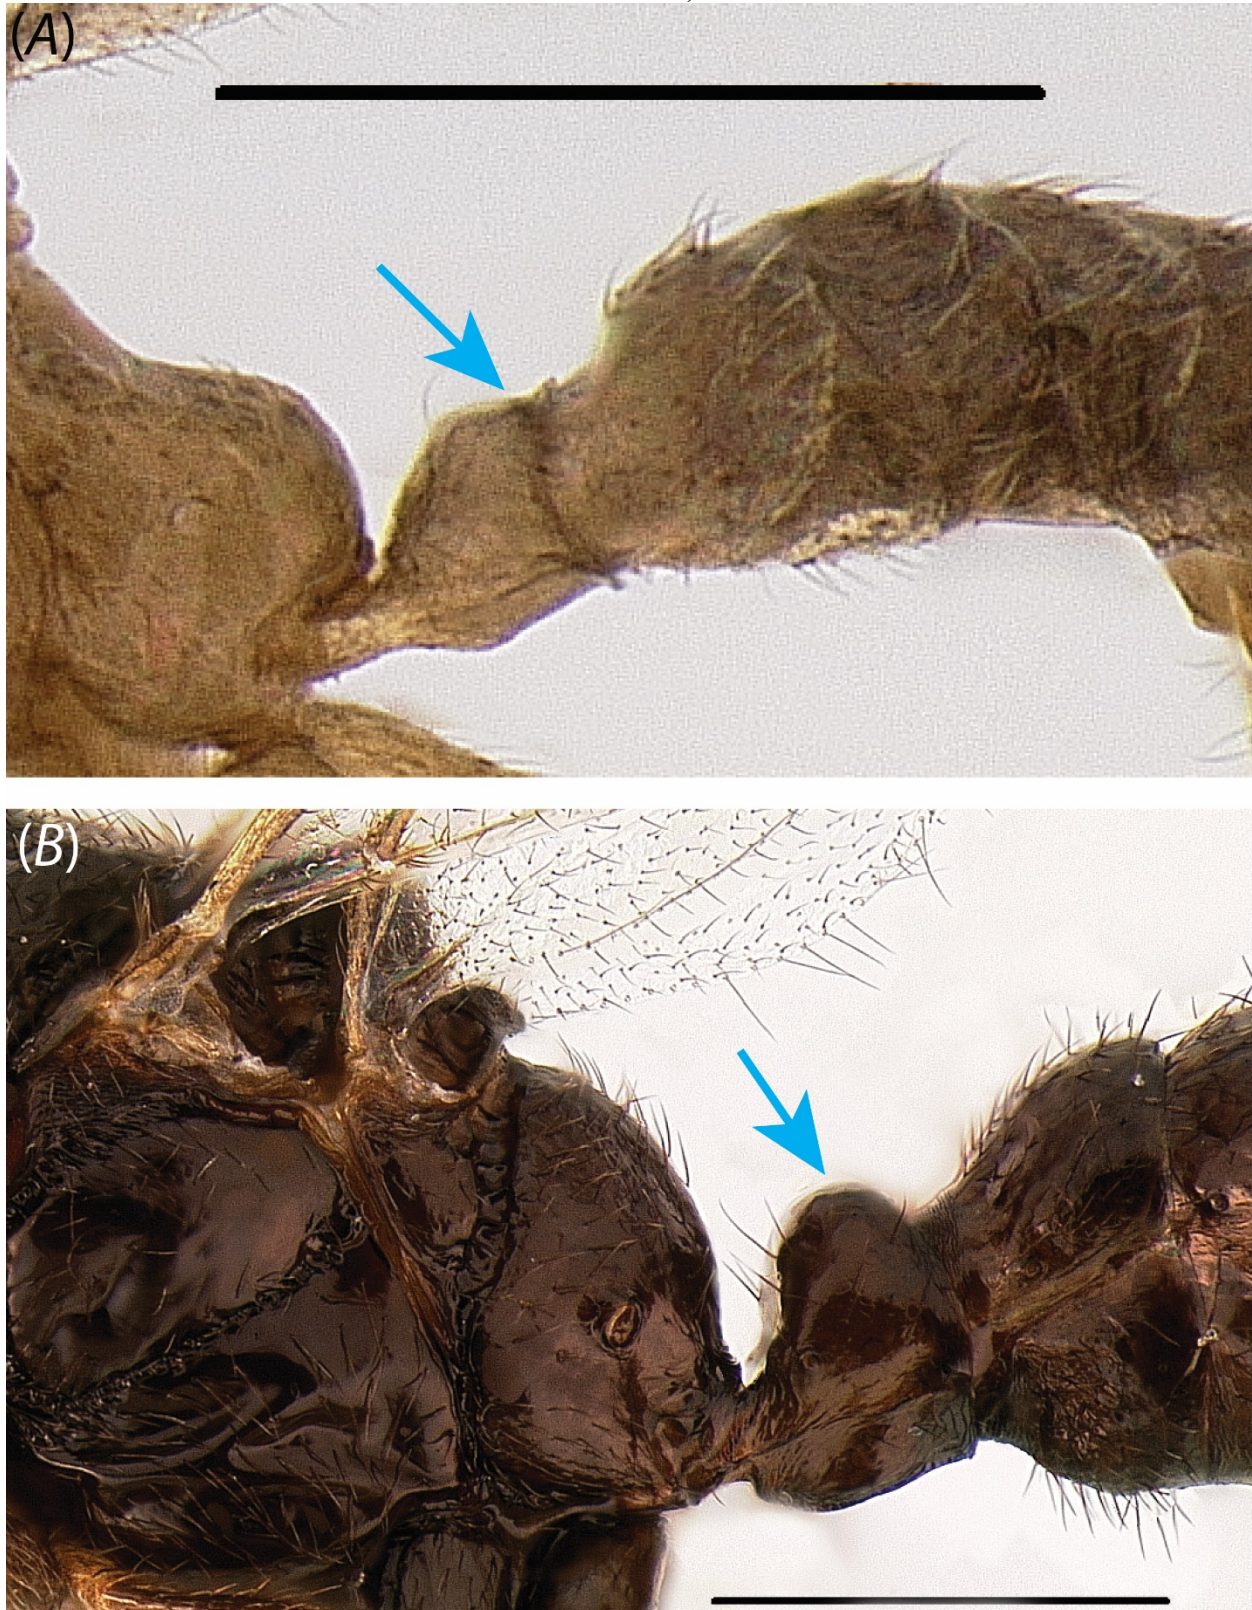

1180



Phylogeny of the Male-Based Ant Genus *Phaulomyrma*

1181 Fig. 34. Profile view of petiole in (A) *Leptanilla* zhg-my04 (CASENT0842553), (B) *Yavnella*  
1182 TH08 (CASENT0227555) and (C) *Leptanilla* zhg-my02 (CASENT0106417). Scale bars A, C =  
1183 0.5 mm.; scale bar B = 0.2 mm.

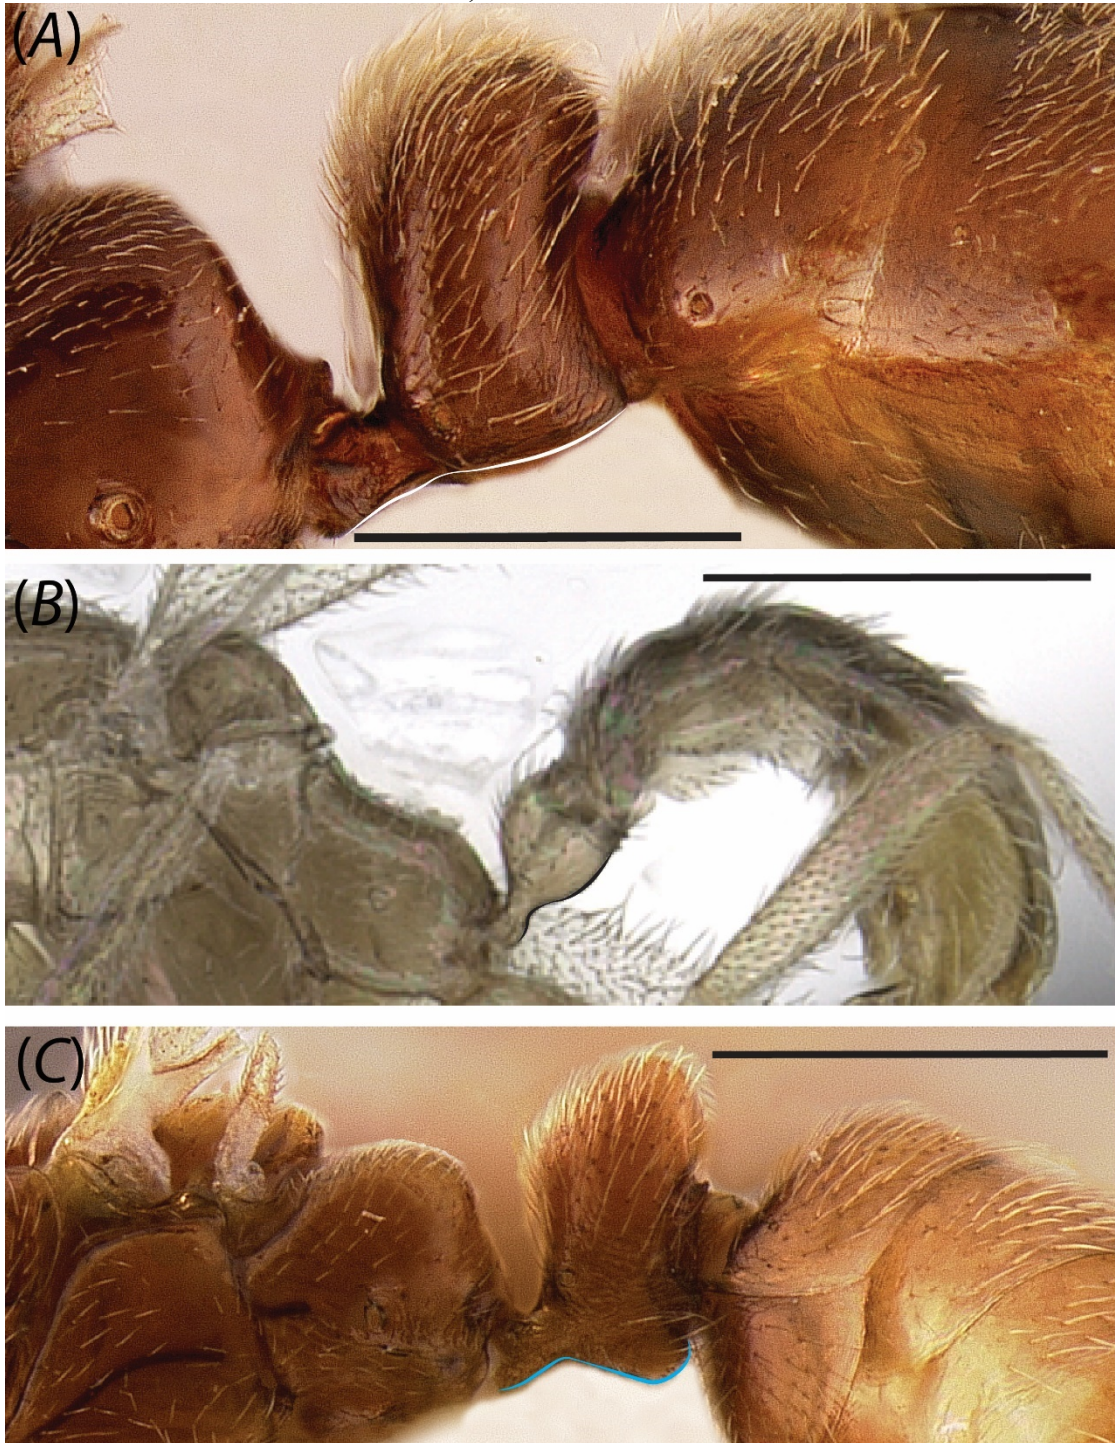

1184  
1185



Phylogeny of the Male-Based Ant Genus *Phaulomyrma*

1186 Fig. 35. Profile view of petiole in (A) *Yavnella* zhg-bt01 (CASENT0106384) and (B) *Protanilla*  
1187 *lini* (OKENT0011097; male described by Griebenow, in press) (not sequenced in this study).  
1188 Scale bar A = 0.3 mm.; B = 0.4 mm.

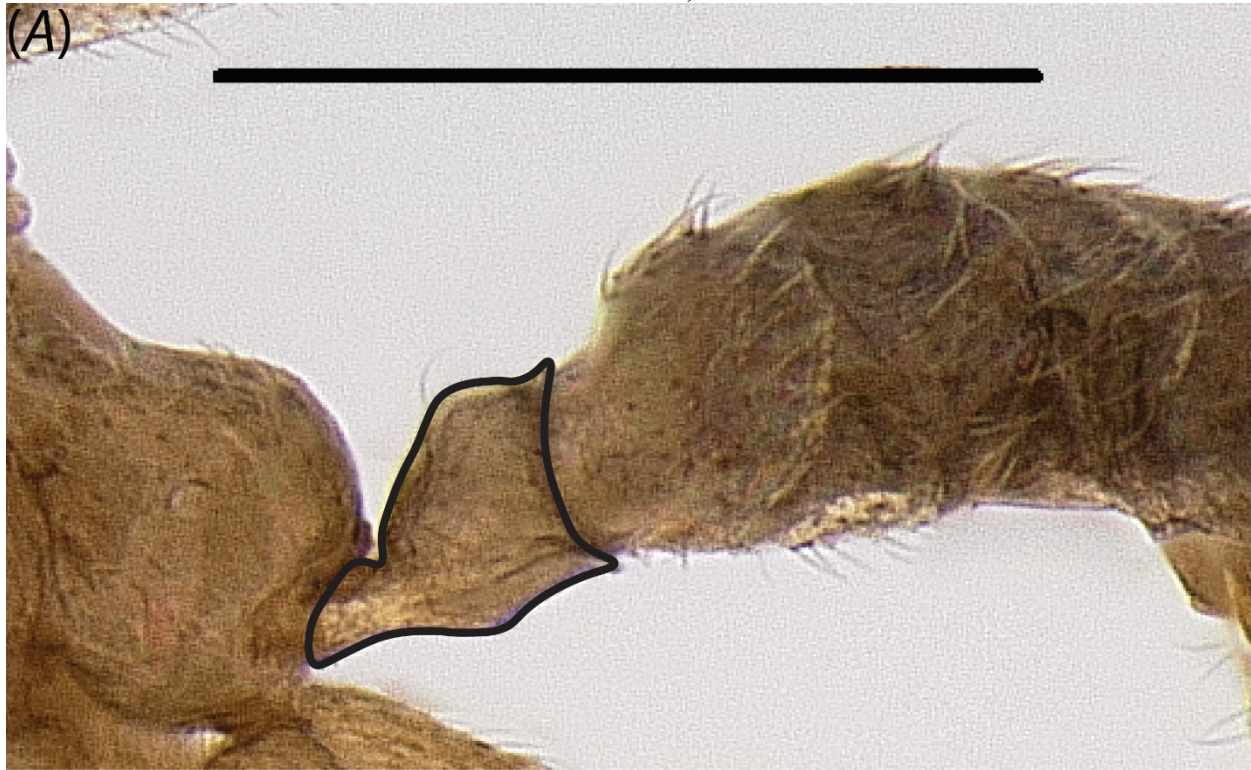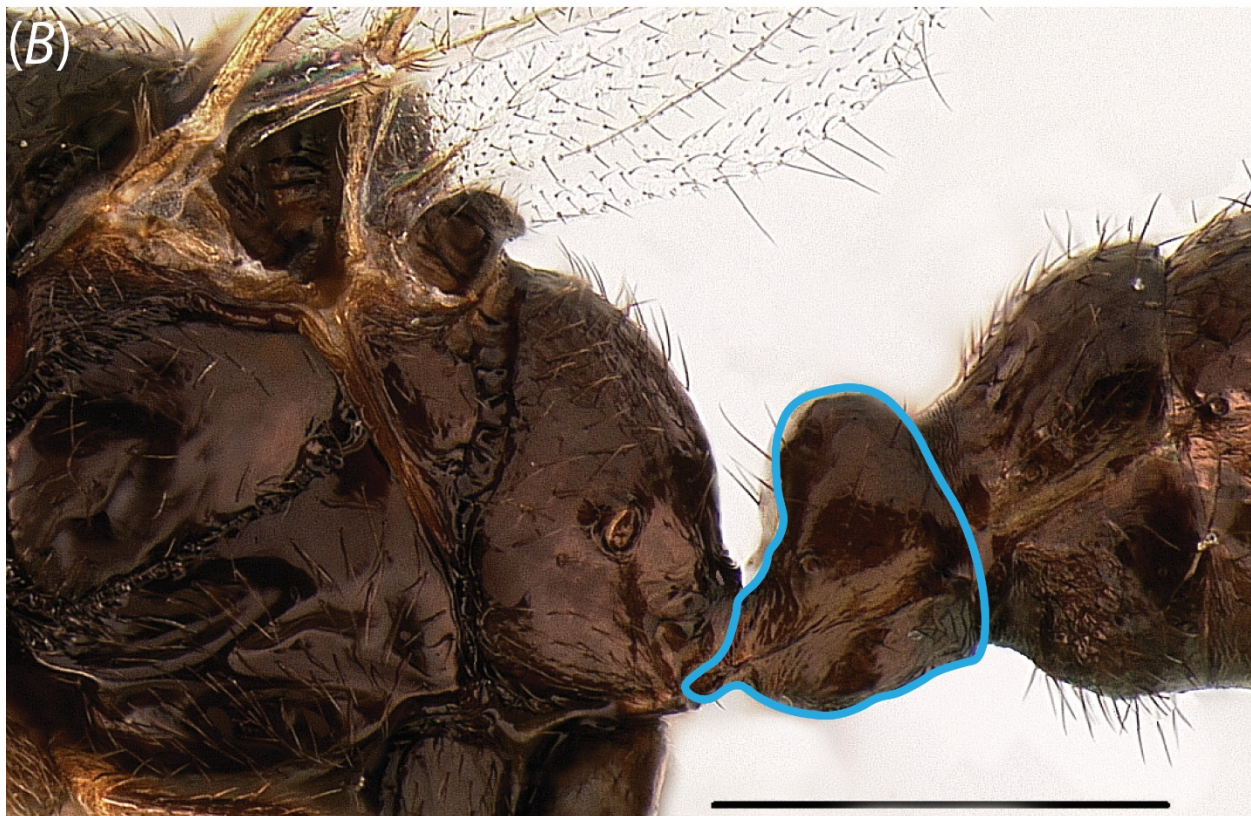

1189



Phylogeny of the Male-Based Ant Genus *Phaulomyrma*

1190 Fig. 36. Profile view of petiole in (A) *Yavnella* zhg-th01 (CASENT0842621) and (B) *Protanilla*  
1191 *lini* (OKENT0011097; male described by Griebenow, in press) (not sequenced in this study).  
1192 Scale bar A = 0.3 mm.; B = 0.4 mm.

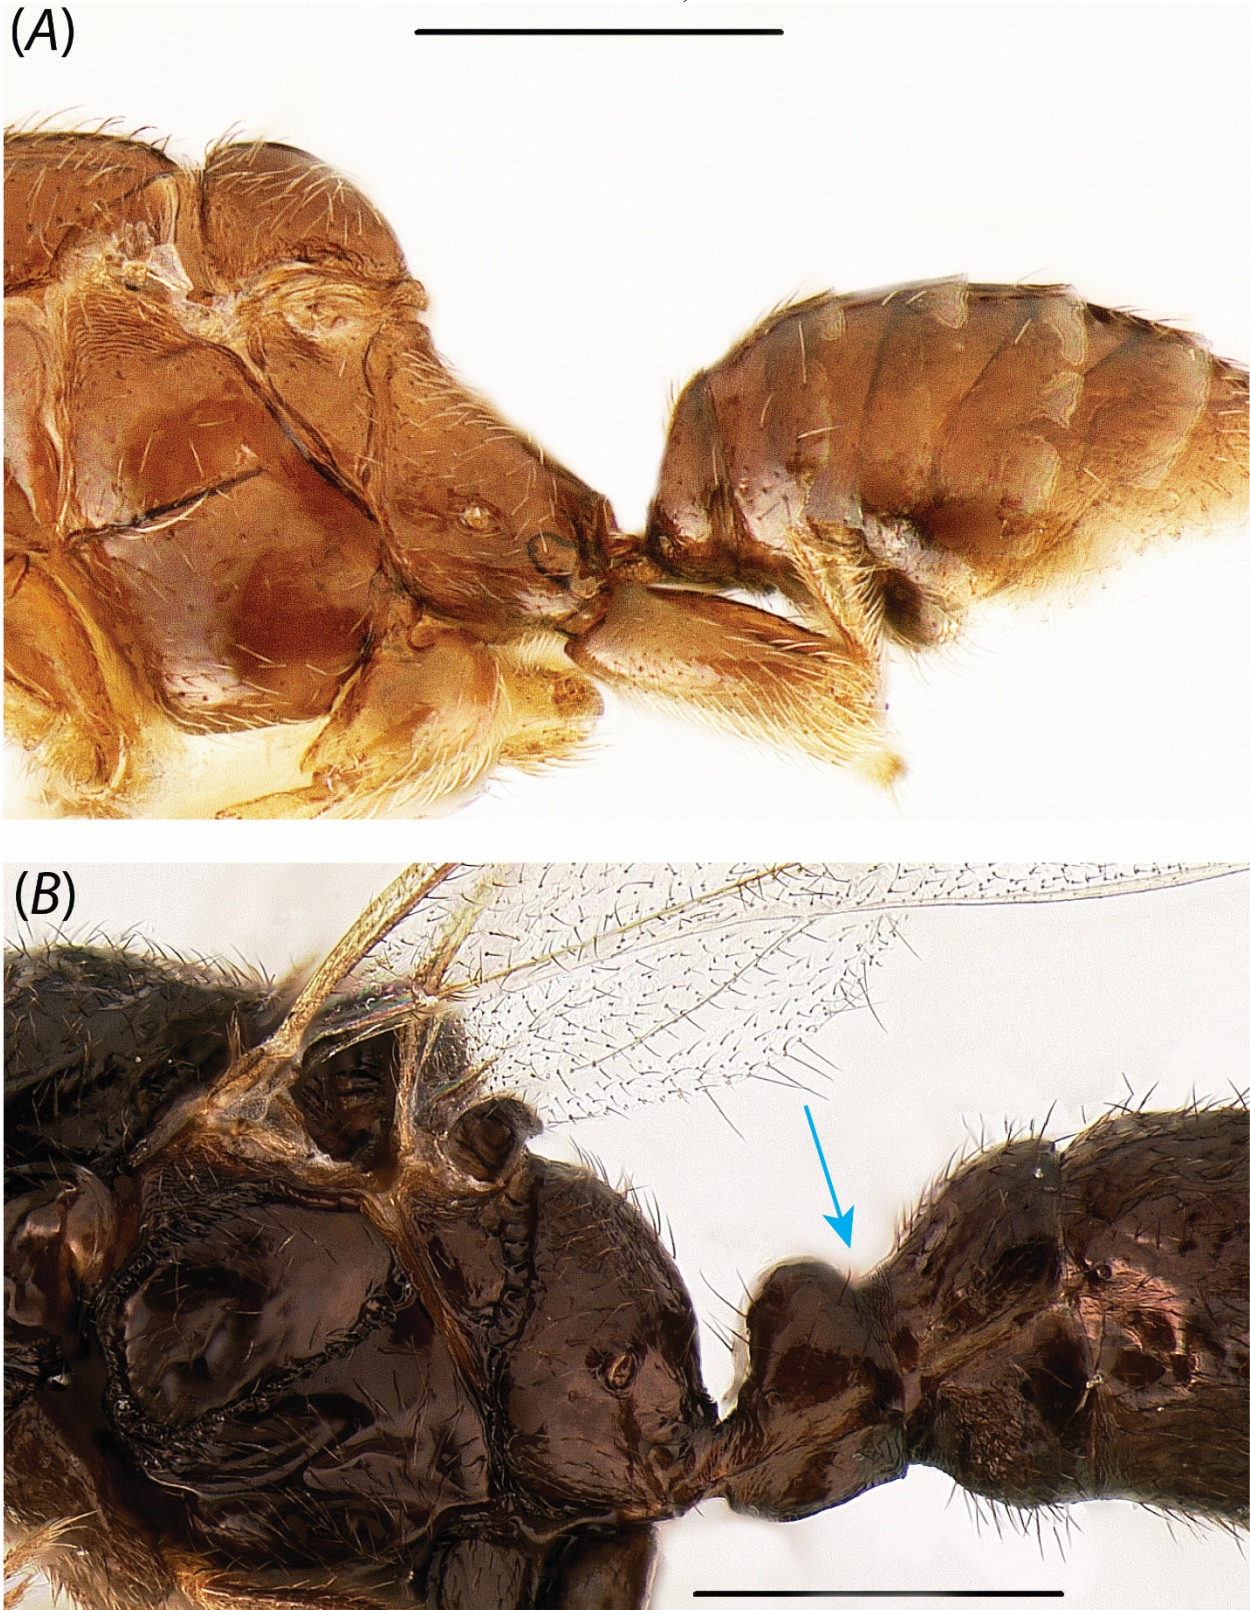

1193



Phylogeny of the Male-Based Ant Genus *Phaulomyrma*

1194  
1195

Fig. 37. Profile view of (A) *Protanilla* TH02 (CASENT0128922) and (B) *Protanilla* TH03 (CASENT0119791). Scale bar A = 0.5 mm.; B = 1 mm.

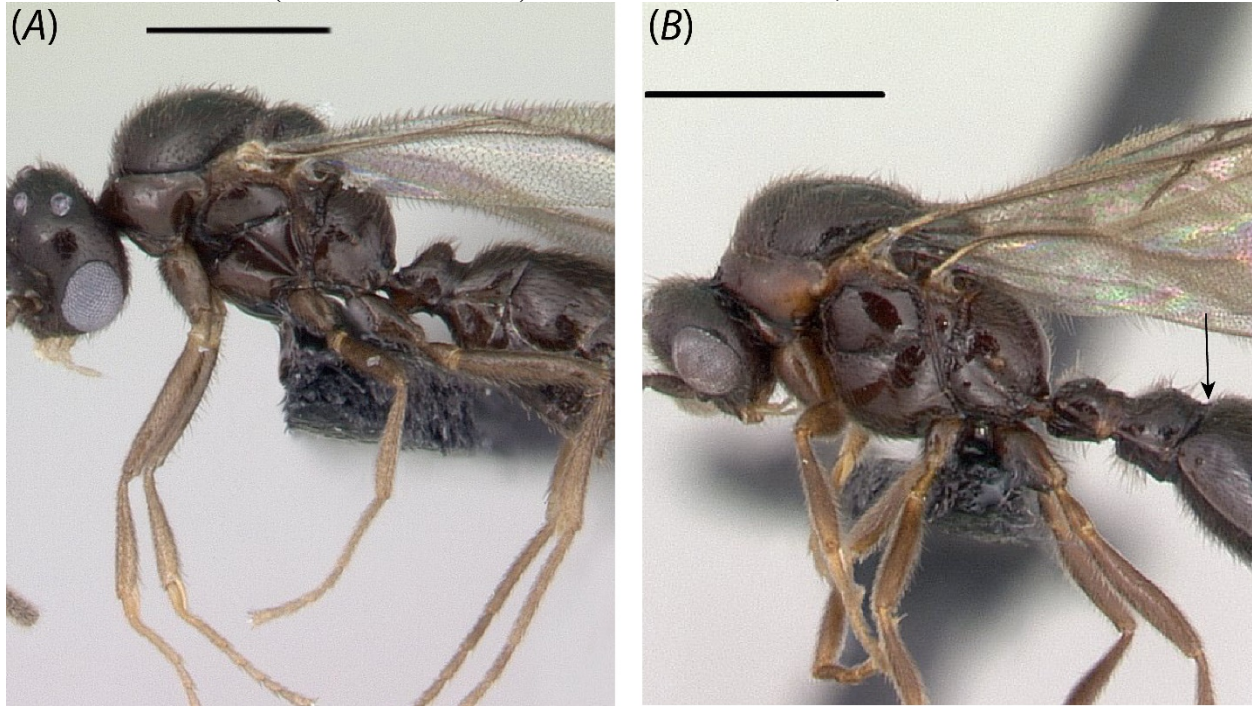

1196  
1197



Phylogeny of the Male-Based Ant Genus *Phaulomyrma*

1198 Fig. 38. Ventral view of abdominal sternite IX in (A) *Leptanilla* zhg-th01 (CASENT0842619)  
1199 and (B) *Leptanilla* zhg-my04 (CASENT0842553). Scale bar A = 0.3 mm.; B = 0.2 mm.

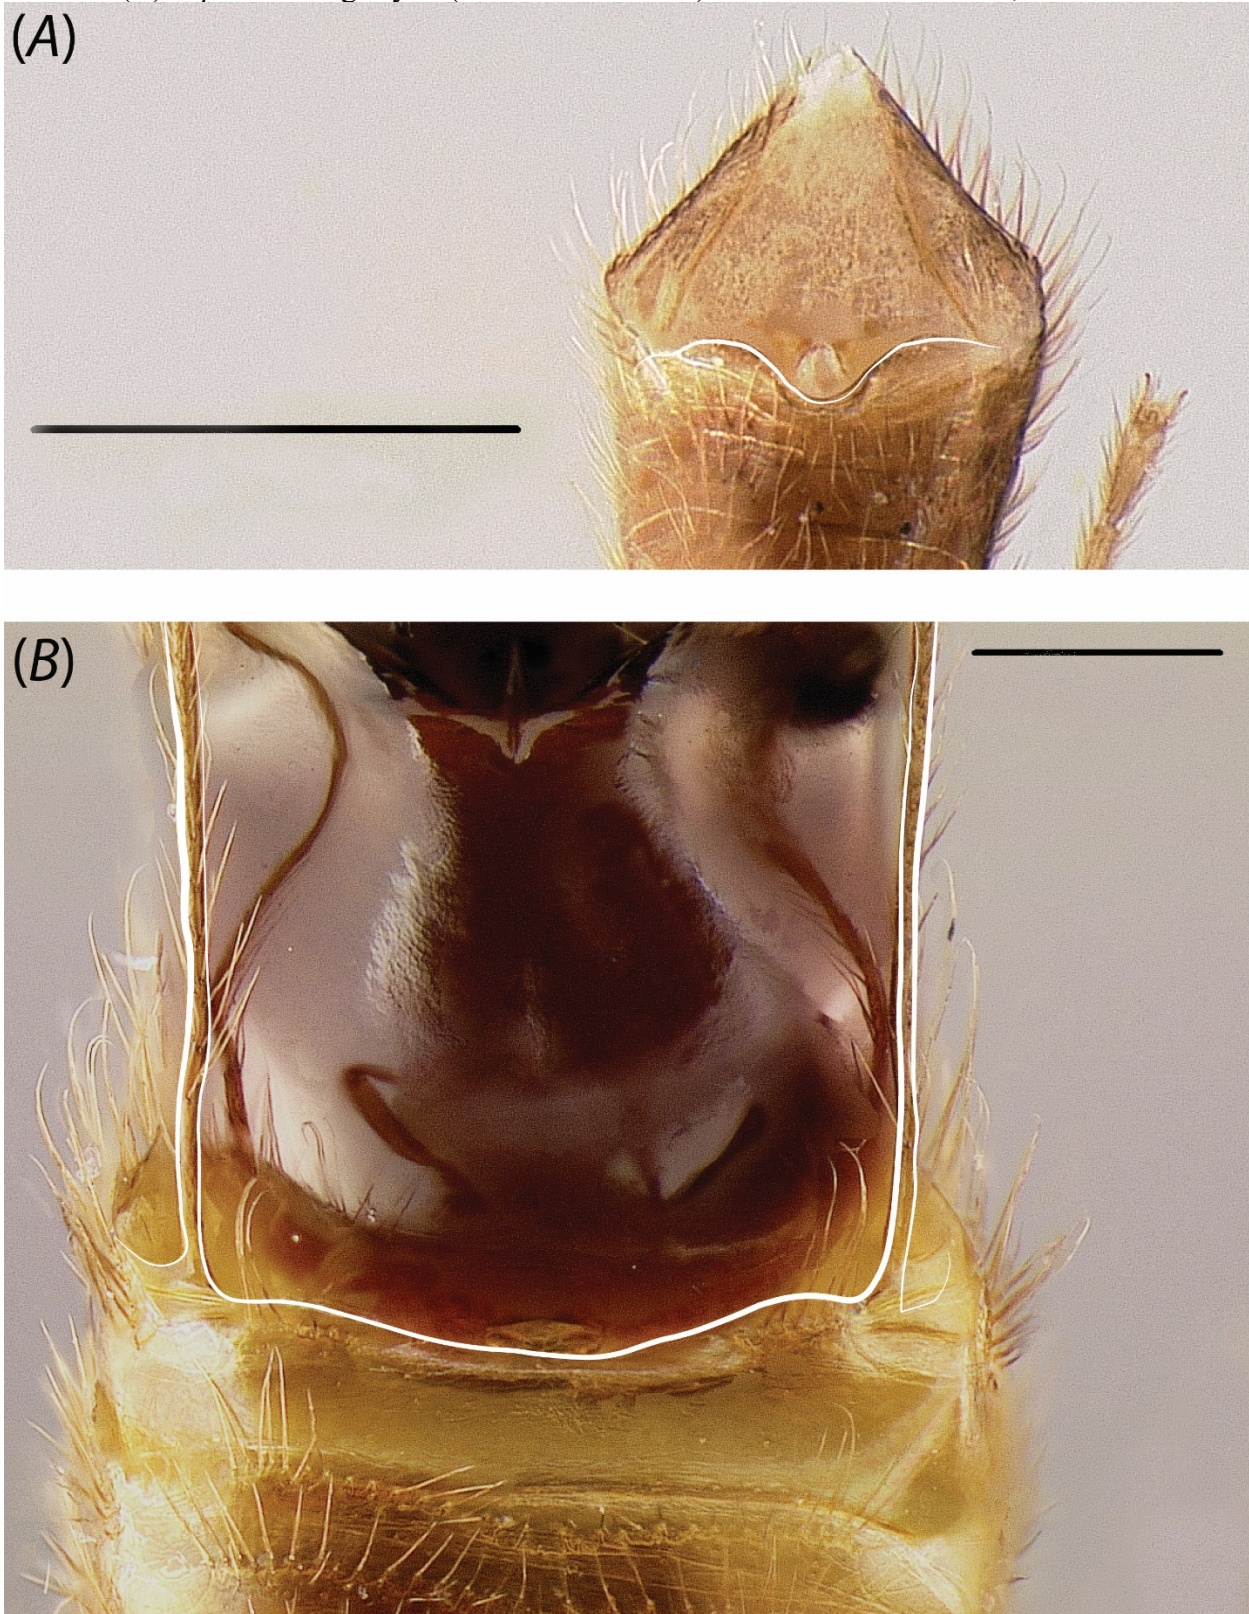

1200



Phylogeny of the Male-Based Ant Genus *Phaulomyrma*

1201  
1202

Fig. 39. Dorsal view of genitalia in (A) *Yavnella* zhg-th01 (CASENT0842620) and (B) *Leptanilla* zhg-my04 (CASENT0842565). Scale bar A = 0.3 mm.; B = 0.4 mm.

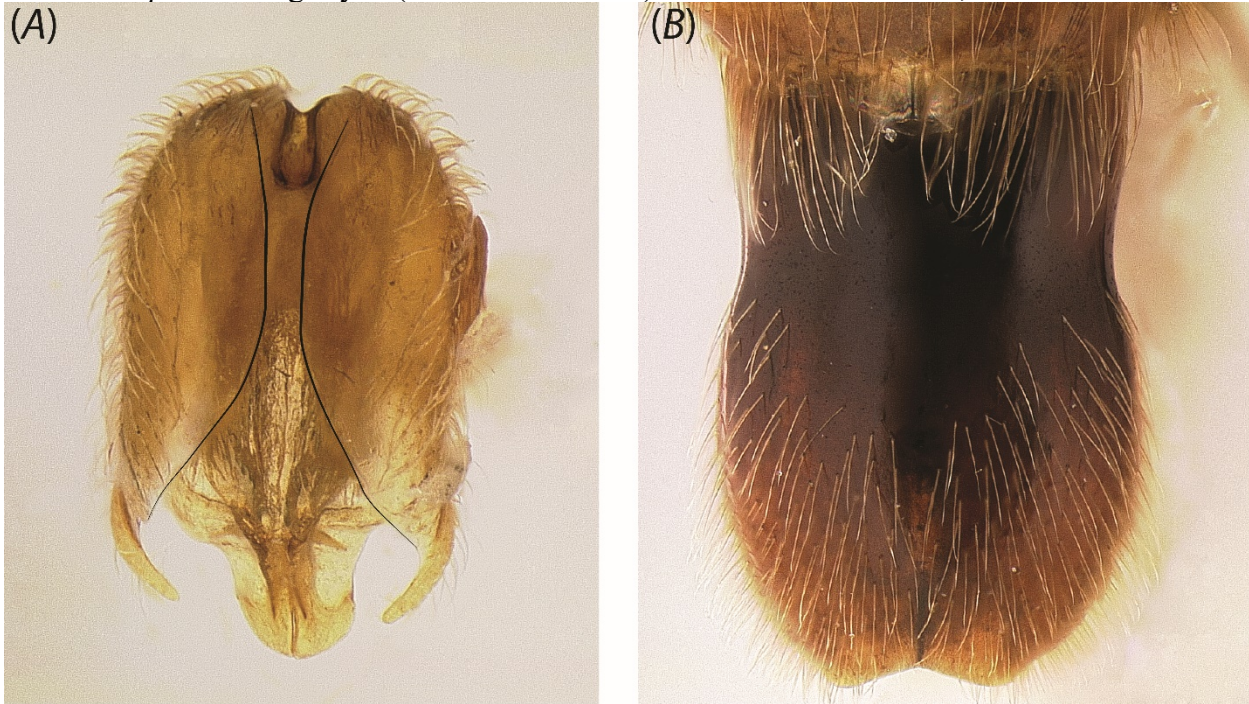

1203  
1204



Phylogeny of the Male-Based Ant Genus *Phaulomyrma*

1205 Fig. 40. Ventral view of genitalia (A) *Protanilla lini* (OKENT0018456; male described by  
1206 Griebenow, in press) (not sequenced in this study) and (B) *Leptanilla* ZA01 (CASENT0106354).  
1207 Scale bar A = 0.3 mm.; B = 0.1 mm.

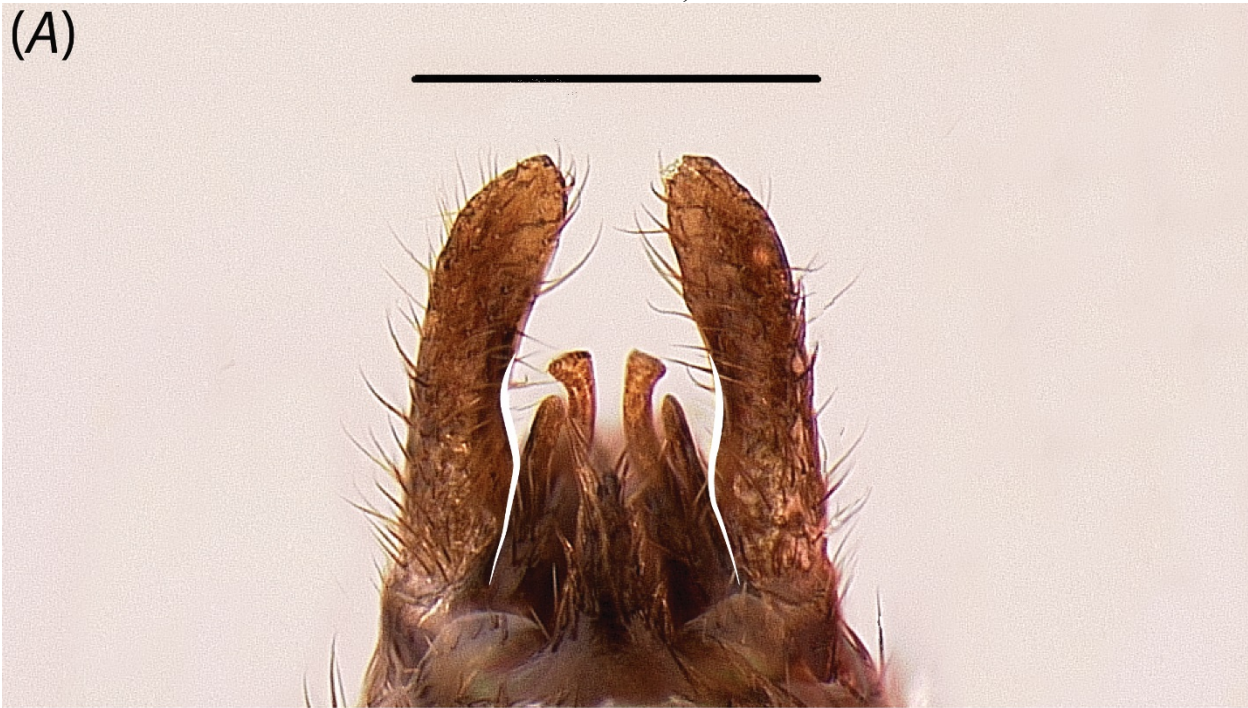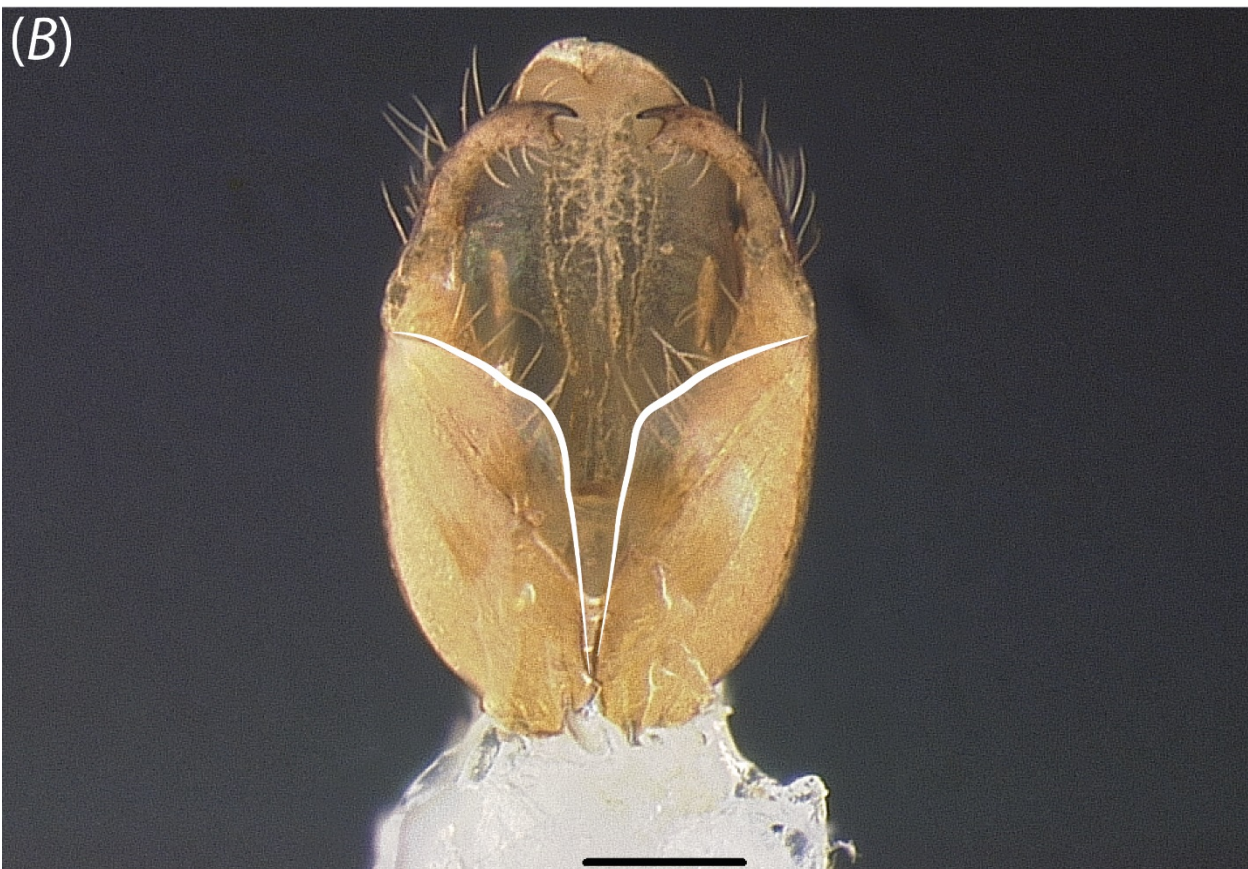

1208



Phylogeny of the Male-Based Ant Genus *Phaulomyrma*

1209 Fig. 41. Profile view of genitalia in (A) *Leptanilla* zhg-my04 (CASENT0842558) and (B)  
1210 *Leptanilla* ZA01 (CASENT0106354). Scale bar A = 0.2 mm.; B = 0.3 mm.

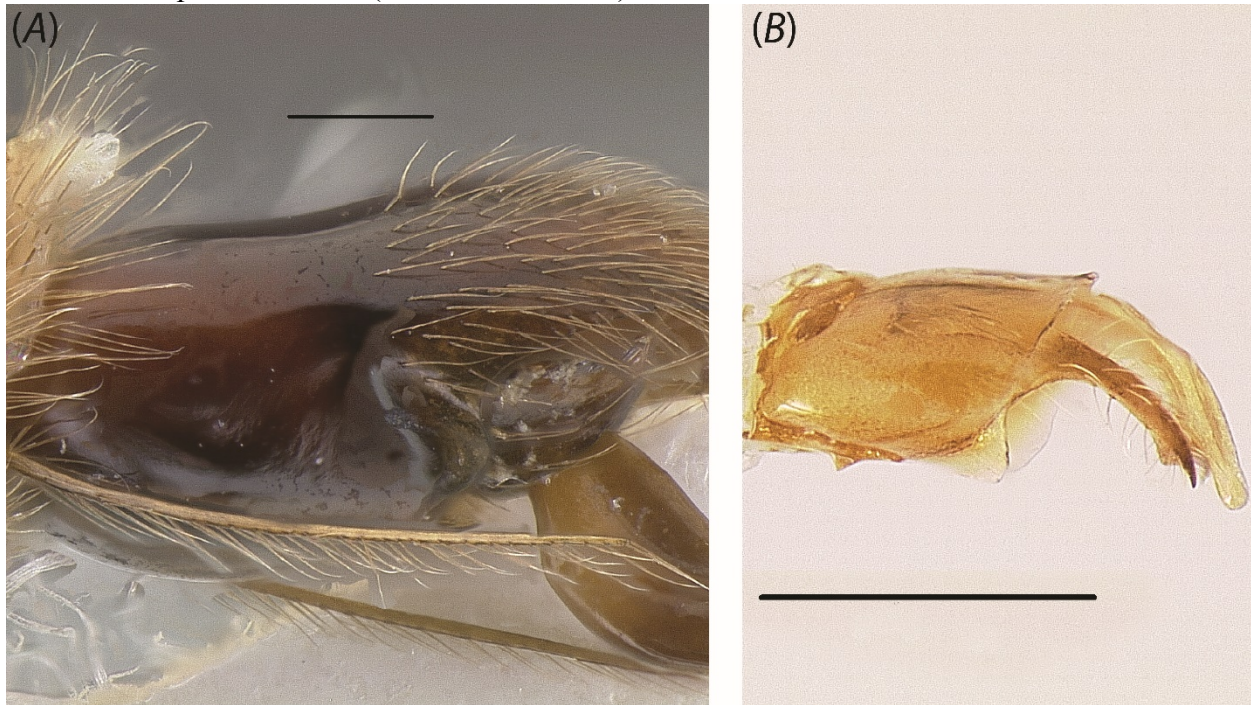

1211

1212



Phylogeny of the Male-Based Ant Genus *Phaulomyrma*

1213  
1214

Fig. 42. Profile view of genitalia in (A) *Leptanilla* zhg-my03 (CASENT0842545) and (B) *Leptanilla* zhg-my04 (CASENT0842558). Scale bar = 0.2 mm.

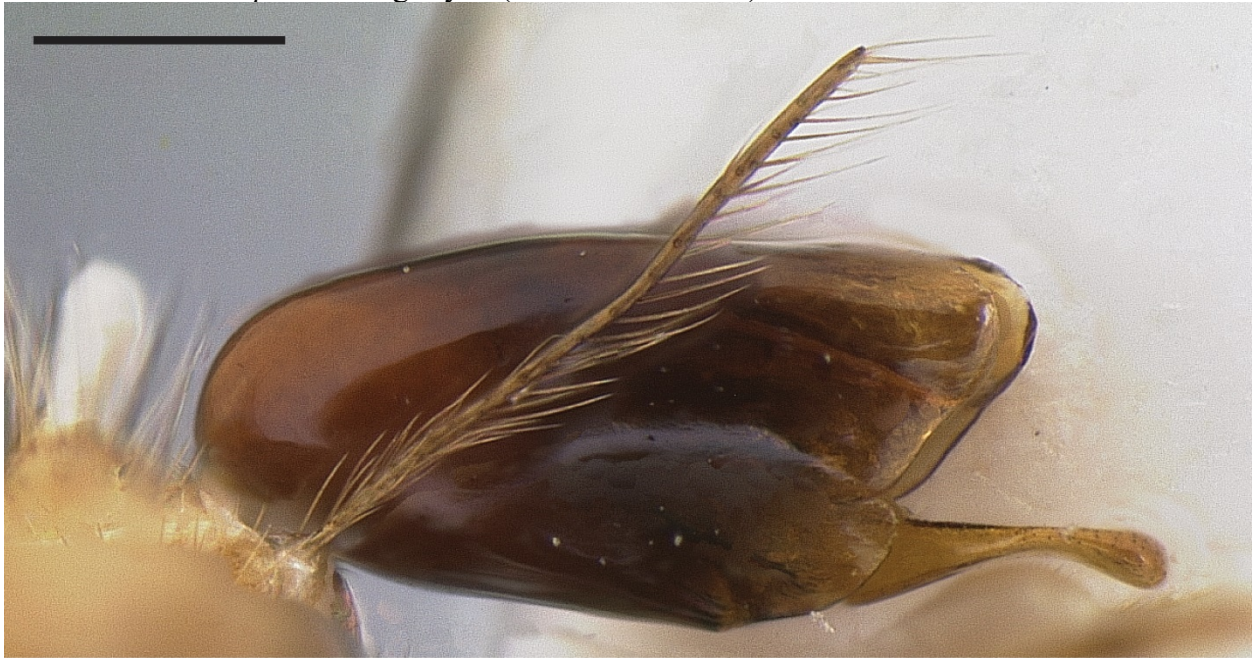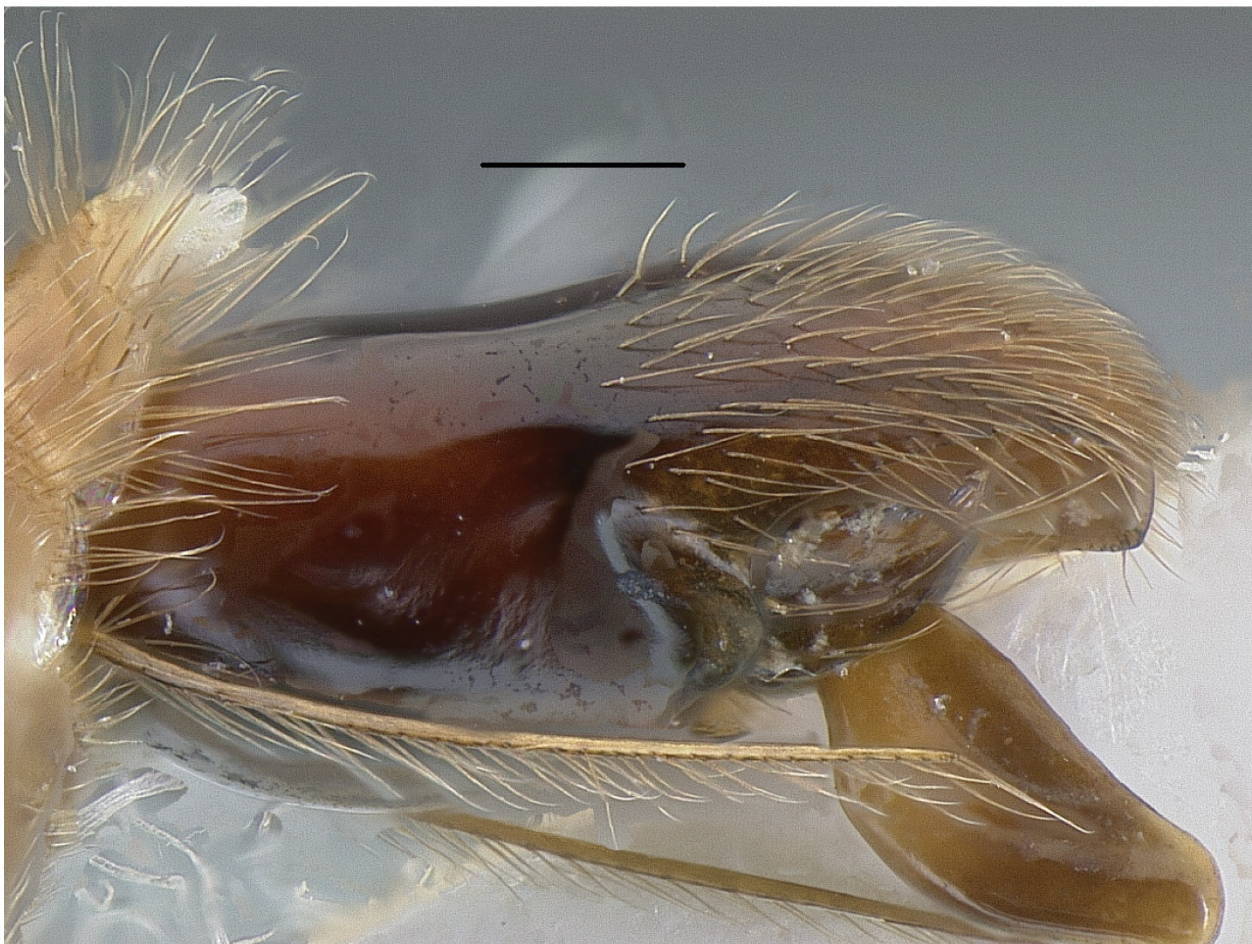

1215



Phylogeny of the Male-Based Ant Genus *Phaulomyrma*

1216 Fig. 43. Posterolateral view of gonopodite in (A) *Yavnella argamani* (CASENT0235253) and (B)  
1217 *Yavnella* TH08 (CASENT0227555) (both images by Shannon Hartman). Scale bar A = 0.2 mm.;  
1218 B = 0.1 mm.

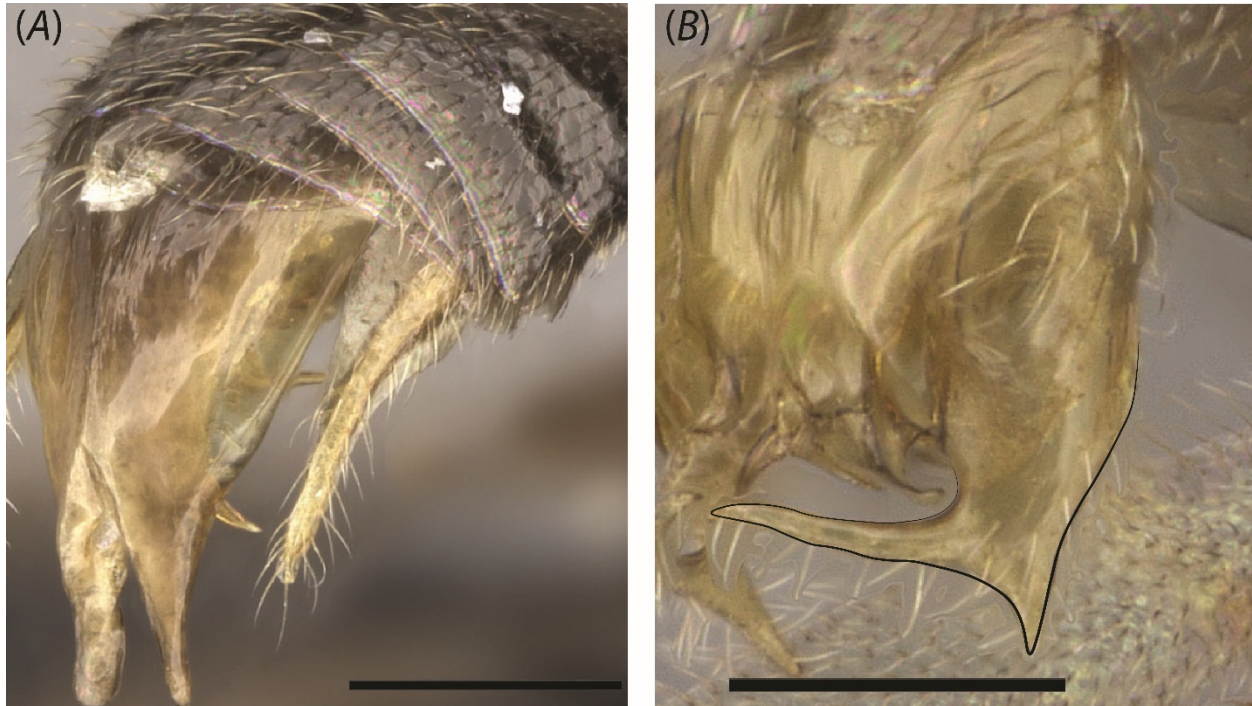

1219

1220

Phylogeny of the Male-Based Ant Genus *Phaulomyrma*

1221 Fig. 44. Posterior view of genitalia in (A) *Yavnella* cf. *indica* (CASENT0106378), (B) *Yavnella*  
1222 zhg-th01 (CASENT0842620) and (C) *Leptanilla* zhg-my04 (CASENT0842565). Scale bar = 0.3  
1223 mm.

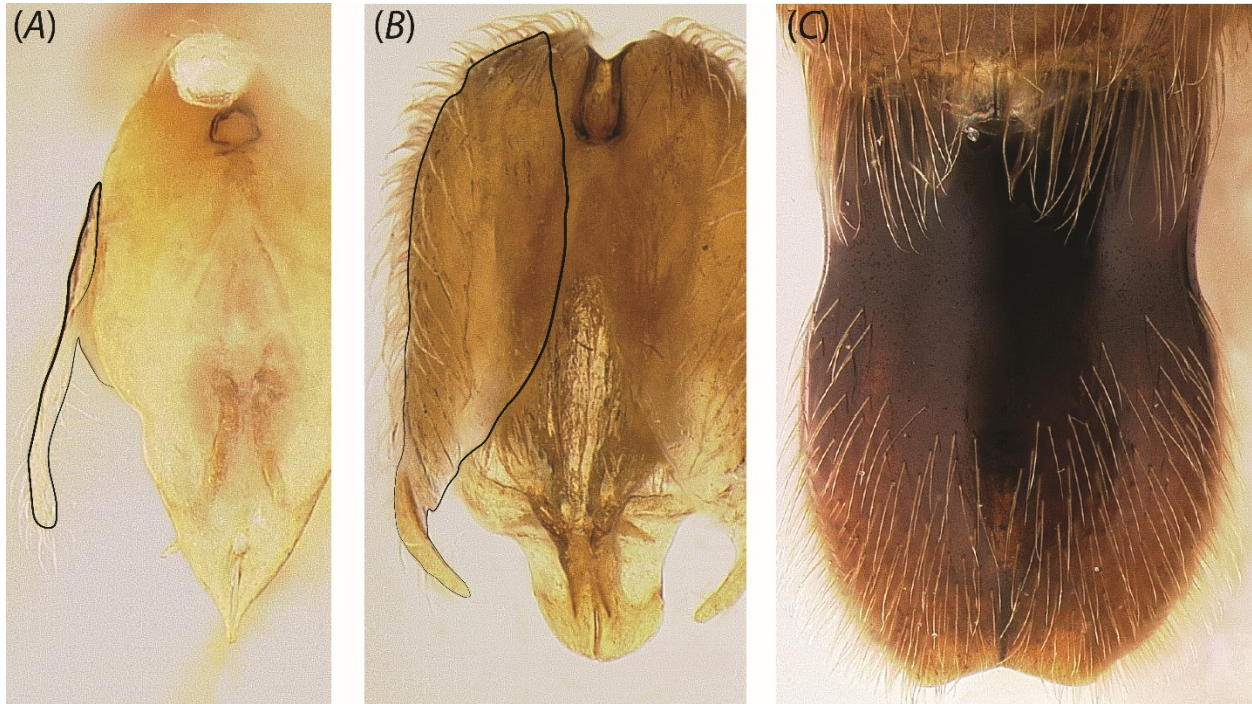

1224  
1225



Phylogeny of the Male-Based Ant Genus *Phaulomyrma*

1226 Fig. 45. Profile view of penial sclerites in (A) *Leptanilla* zhg-my04 (CASENT0842550) and (B)  
1227 *Leptanilla* zhg-my05 (CASENT0842571). Scale bar A = 0.3 mm.; B = 0.2 mm.

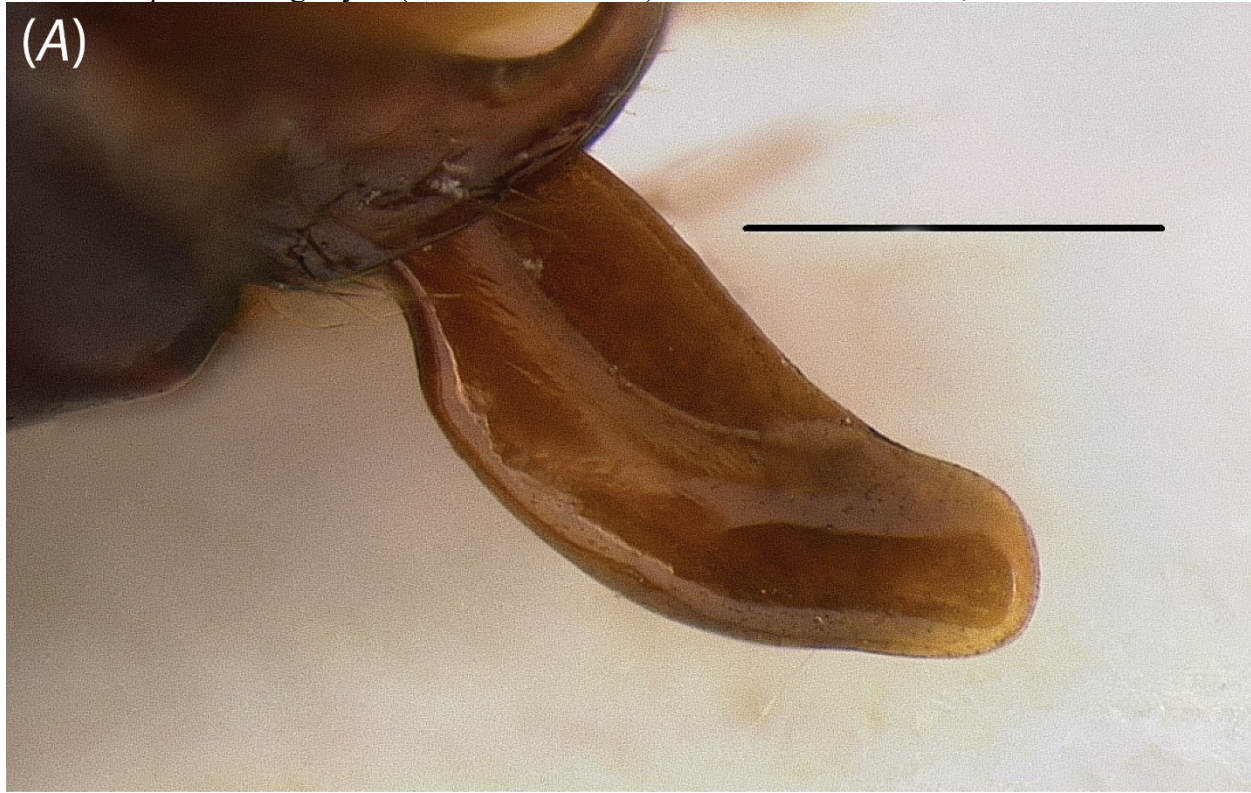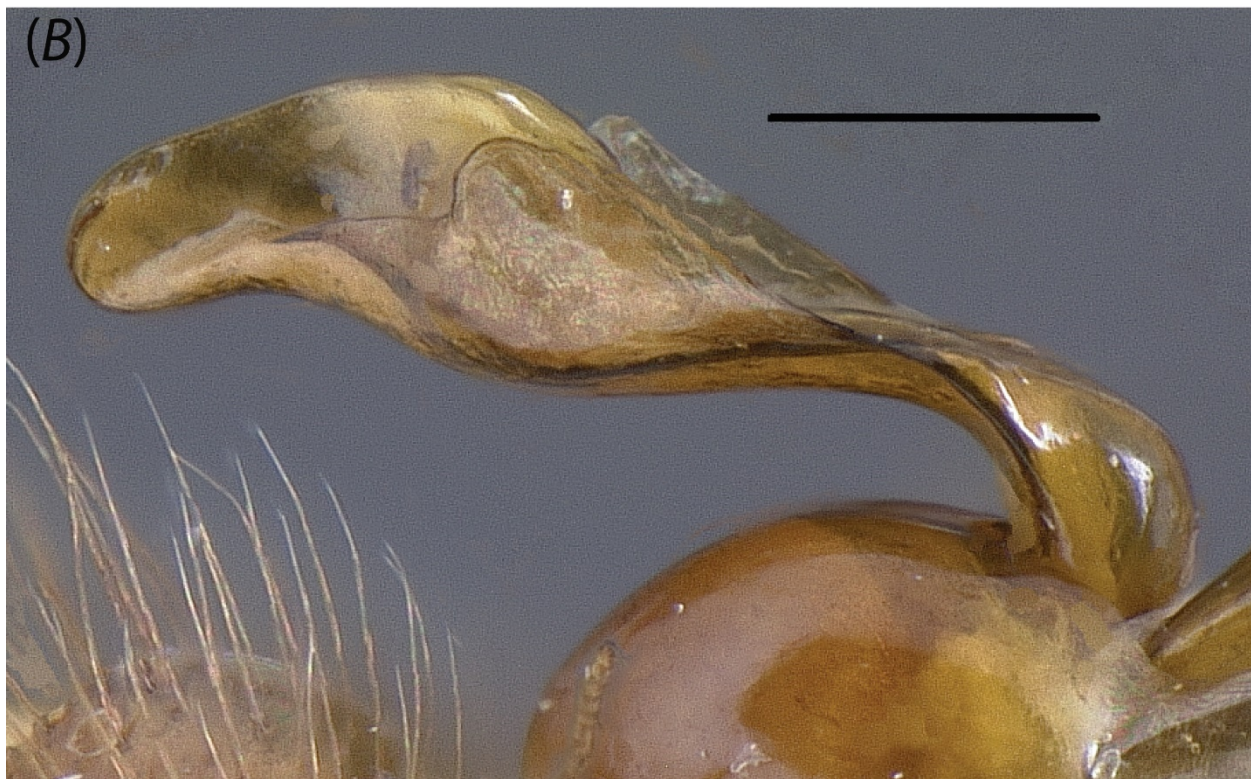

1228



Phylogeny of the Male-Based Ant Genus *Phaulomyrma*

1229 Fig. 46. Posterior view of penial sclerites in (A) *Leptanilla* zhg-my04 (CASENT0842553) and  
1230 (B) *Yavnella* zhg-th01 (CASENT0842620). Scale bar = 0.3 mm.

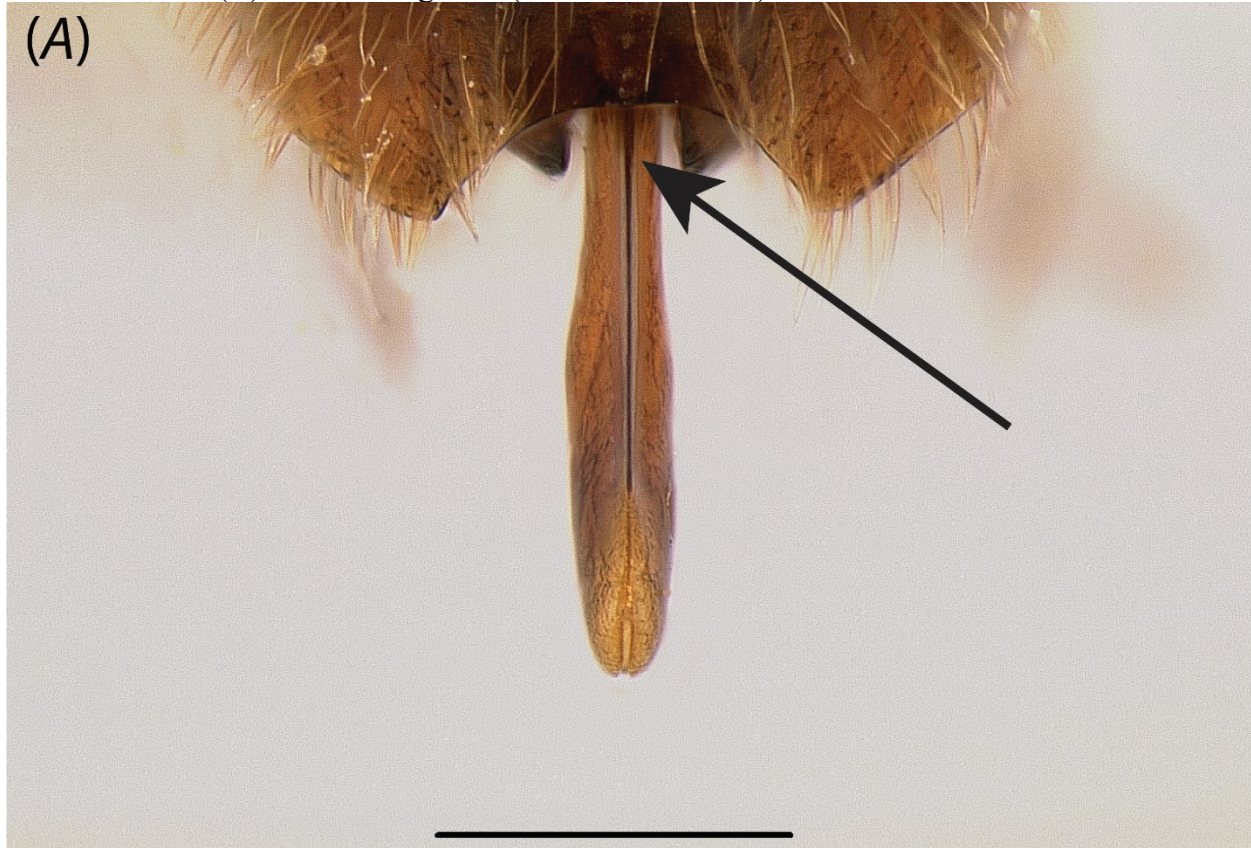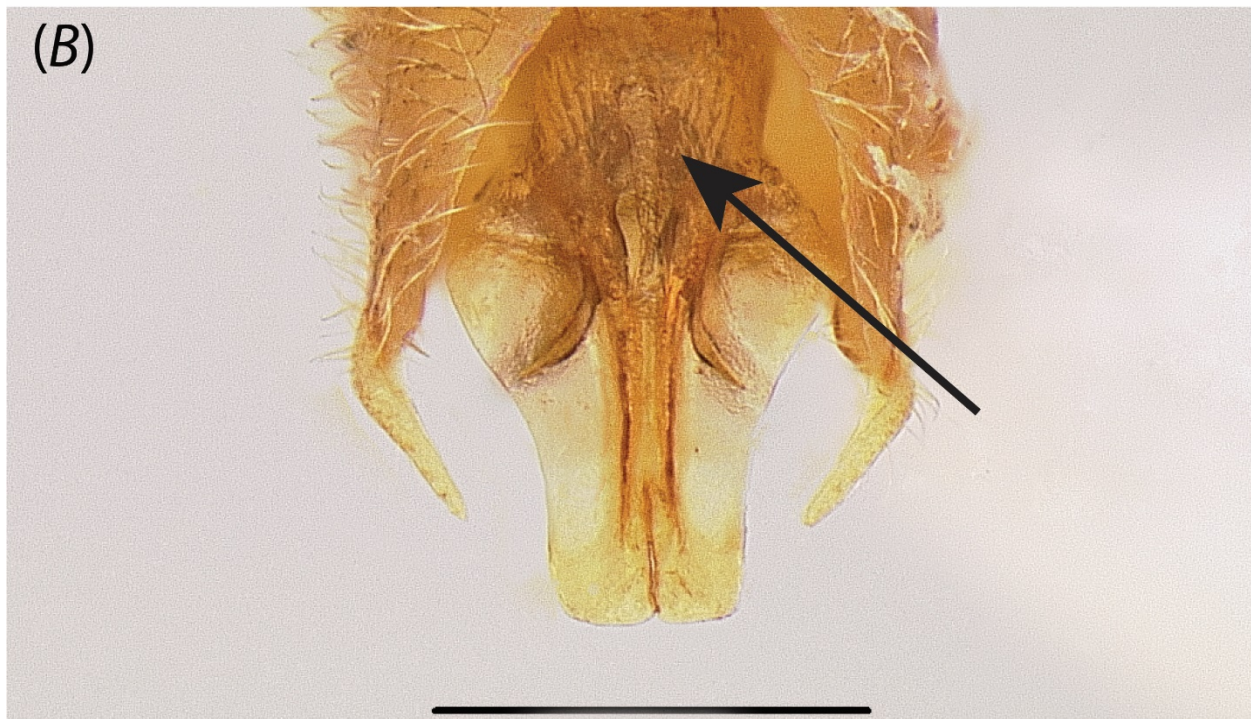

1231



Phylogeny of the Male-Based Ant Genus *Phaulomyrma*

1232 Fig. 47. Posterior view of penial sclerites in (A) *Leptanilla* zhg-my04 (CASENT0842553) and  
1233 (B) *Yavnella* zhg-th01 (CASENT0842620). Scale bar = 0.3 mm.

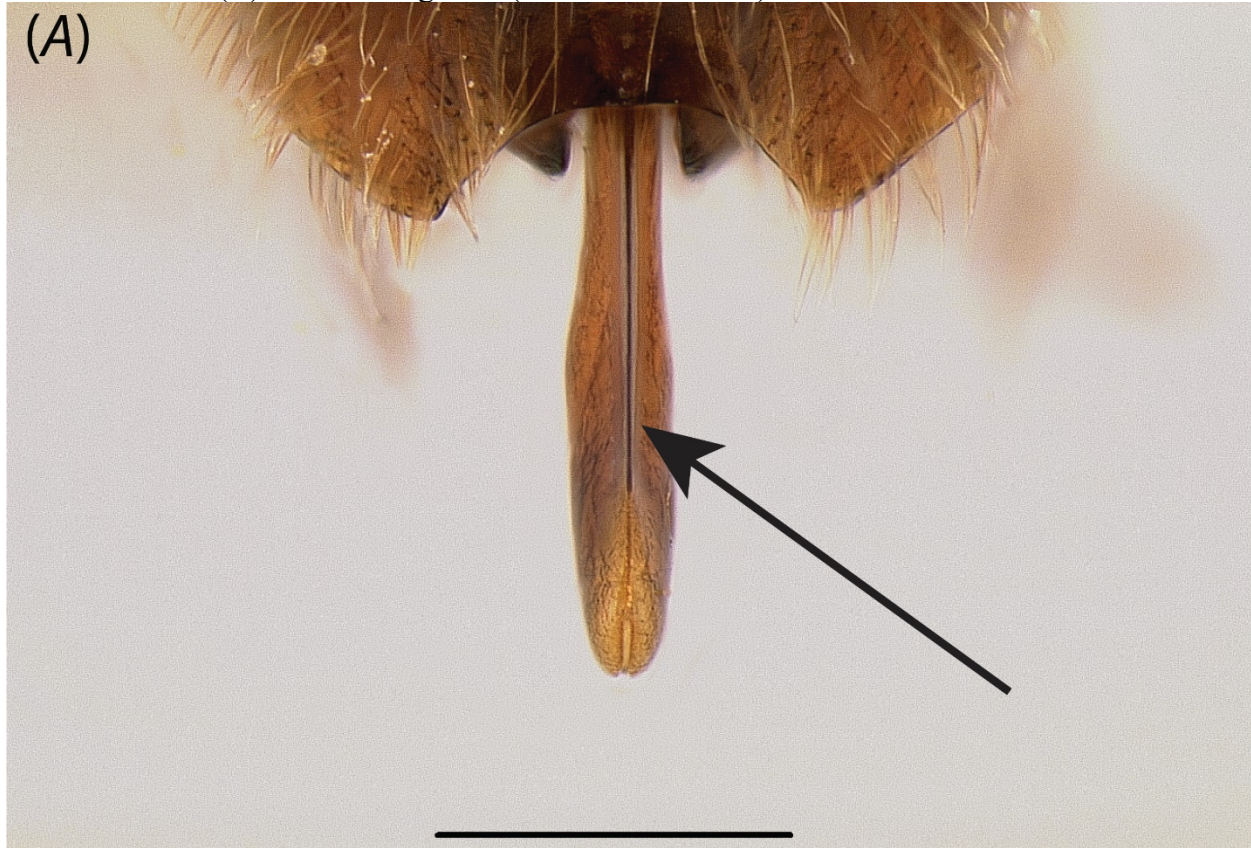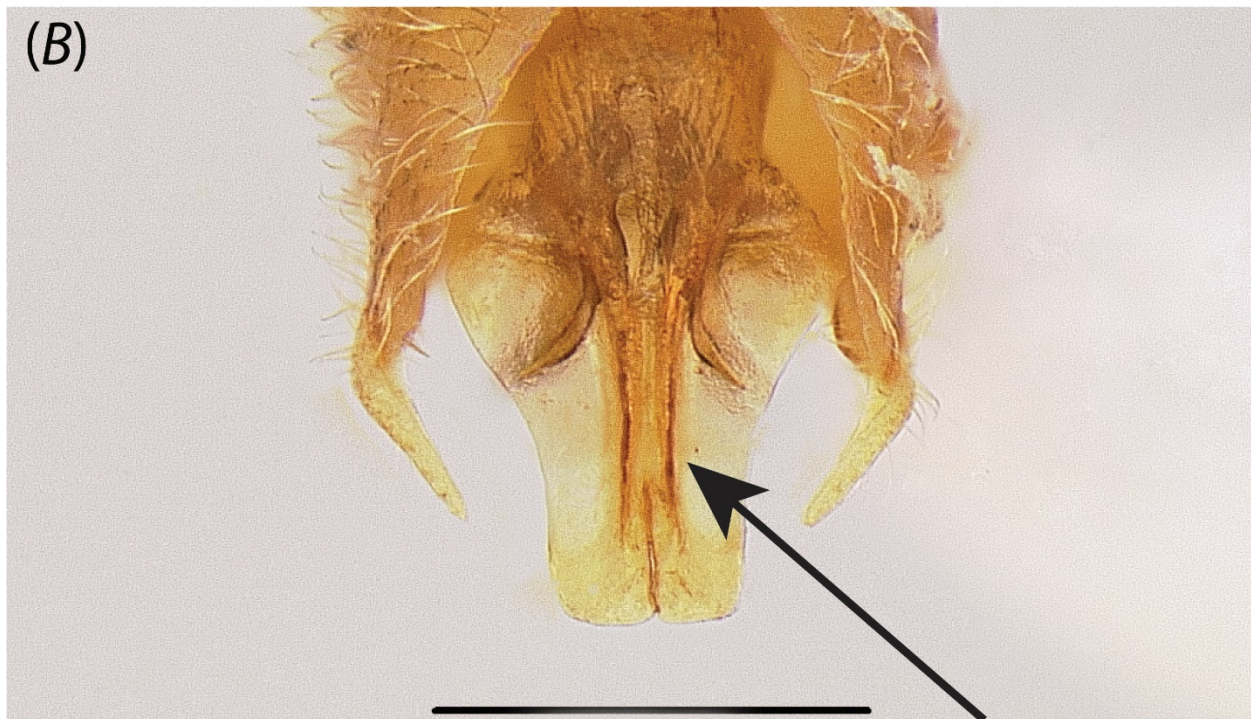

1234



Phylogeny of the Male-Based Ant Genus *Phaulomyrma*

1235 Fig. 48. Posterior view of penial sclerites in (A) *Yavnella* TH06 (CASENT0129609; Erin Prado)  
1236 and (B) *Leptanilla* GR02 (CASENT0106068). Scale bar A = 0.1 mm.; B = 0.3 mm.

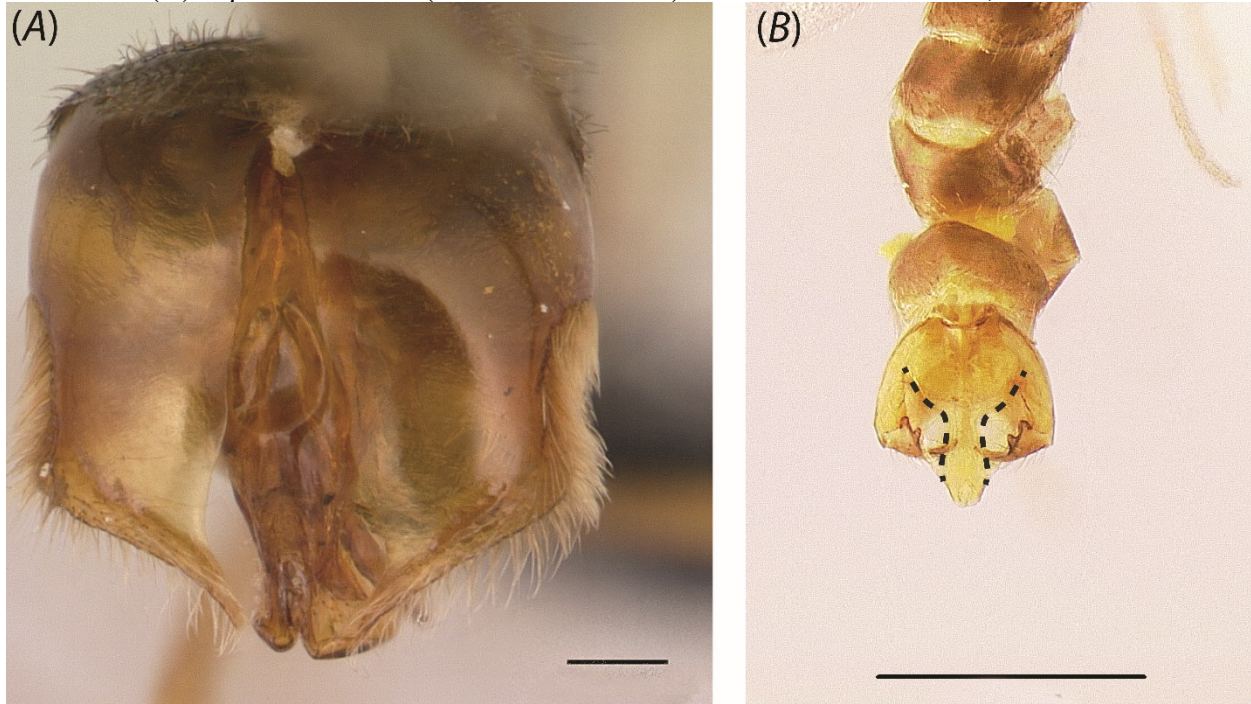

1237

1238



Phylogeny of the Male-Based Ant Genus *Phaulomyrma*

1239 Fig. 49. Posteroventral view of penial sclerites in (A) *Noonilla* zhg-my02 (CASENT0842595)  
1240 and (B) *Leptanilla* zhg-my05 (CASENT0106432). Scale bar = 0.3 mm.

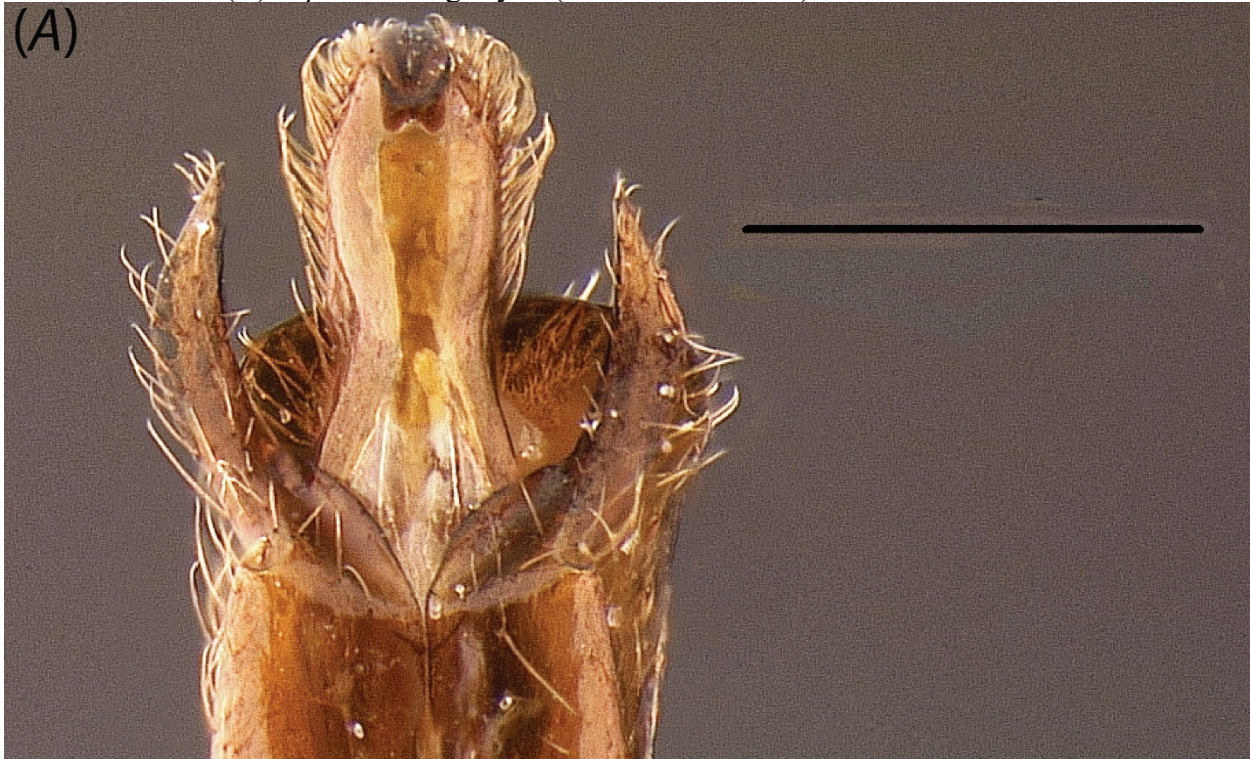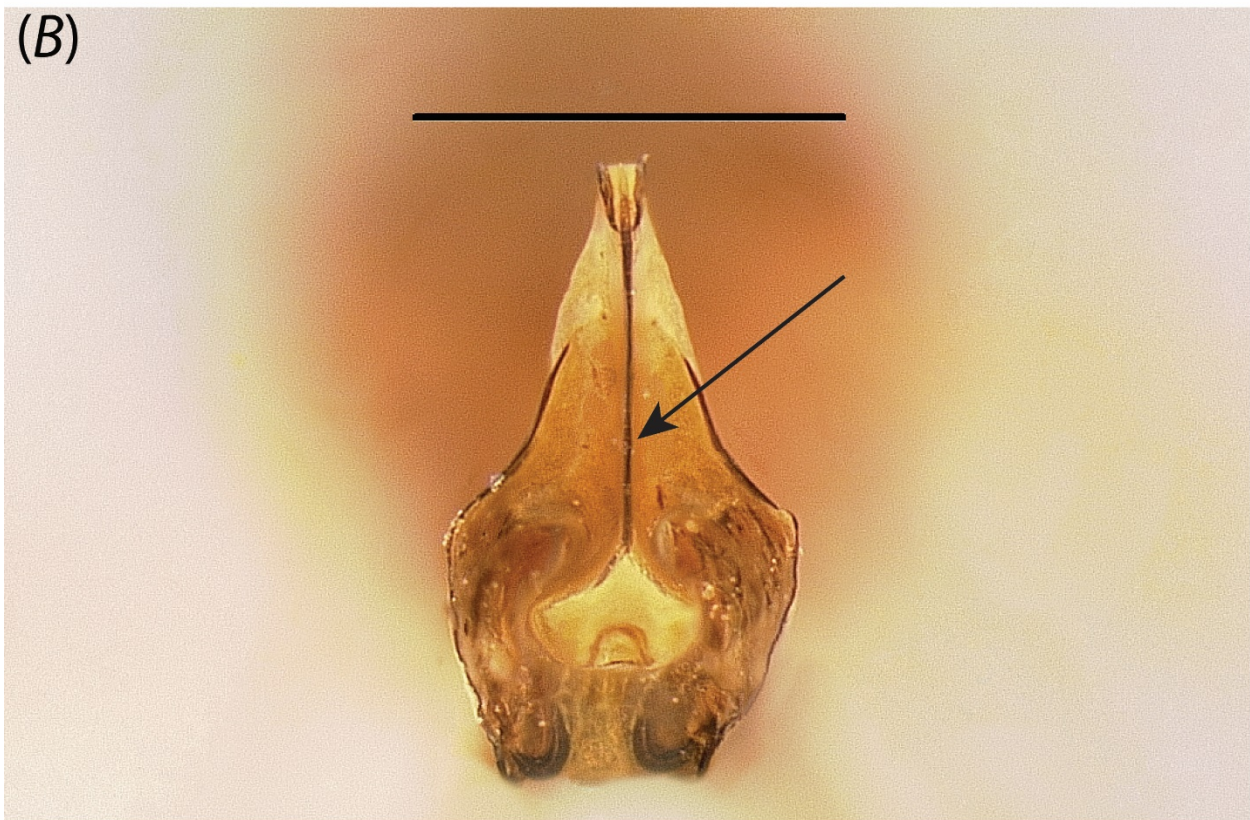

1241

1242



Phylogeny of the Male-Based Ant Genus *Phaulomyrma*

1243 Fig. 50. Posterior view of phallotreme in (A) *Leptanilla* zhg-my05 (CASENT0106432) and (B)  
1244 *Noonilla* zhg-my02 (CASENT0842599). Scale bar A = 0.4 mm.; B = 0.3 mm.

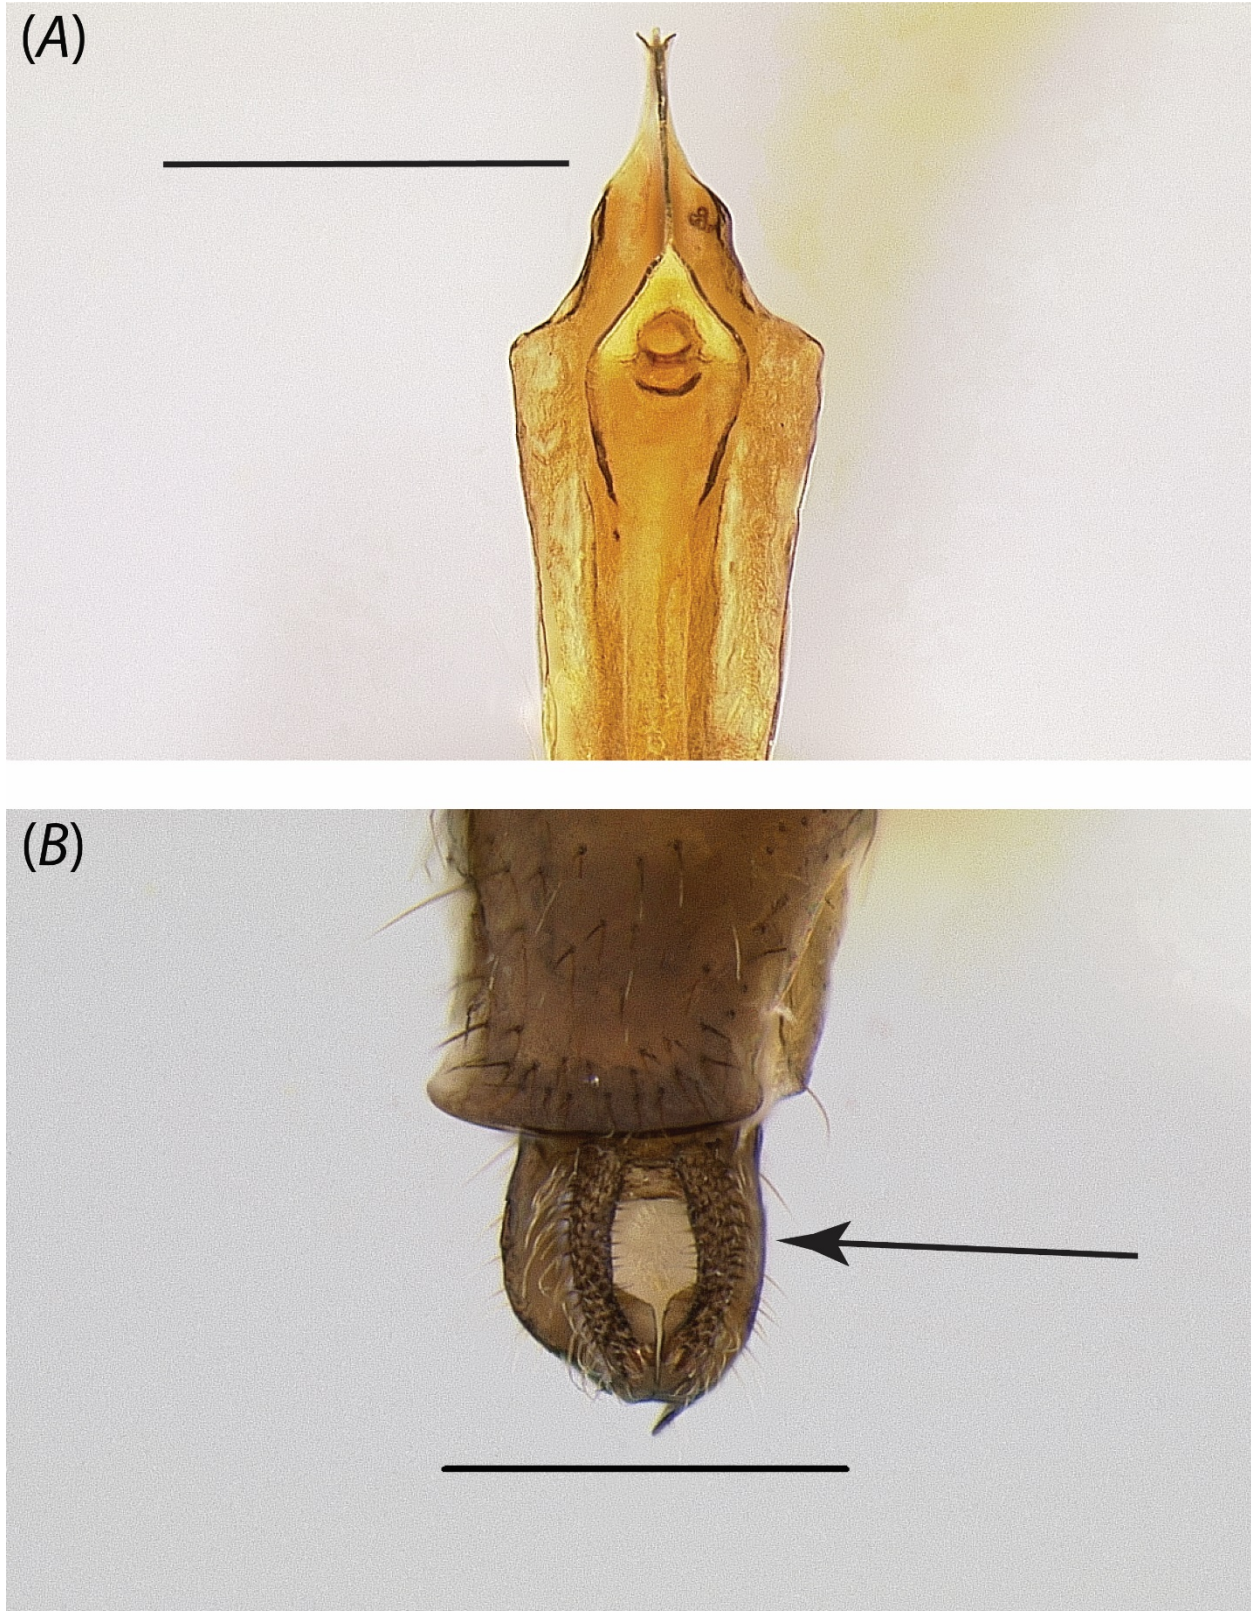

1245



Phylogeny of the Male-Based Ant Genus *Phaulomyrma*

1246 Fig. 51. Posterodorsal view of the penial sclerites in (A) *Yavnella argamani* (CASENT0235253)  
1247 and (B) *Leptanilla* GR02 (CASENT0106068). Scale bar = 0.3 mm.

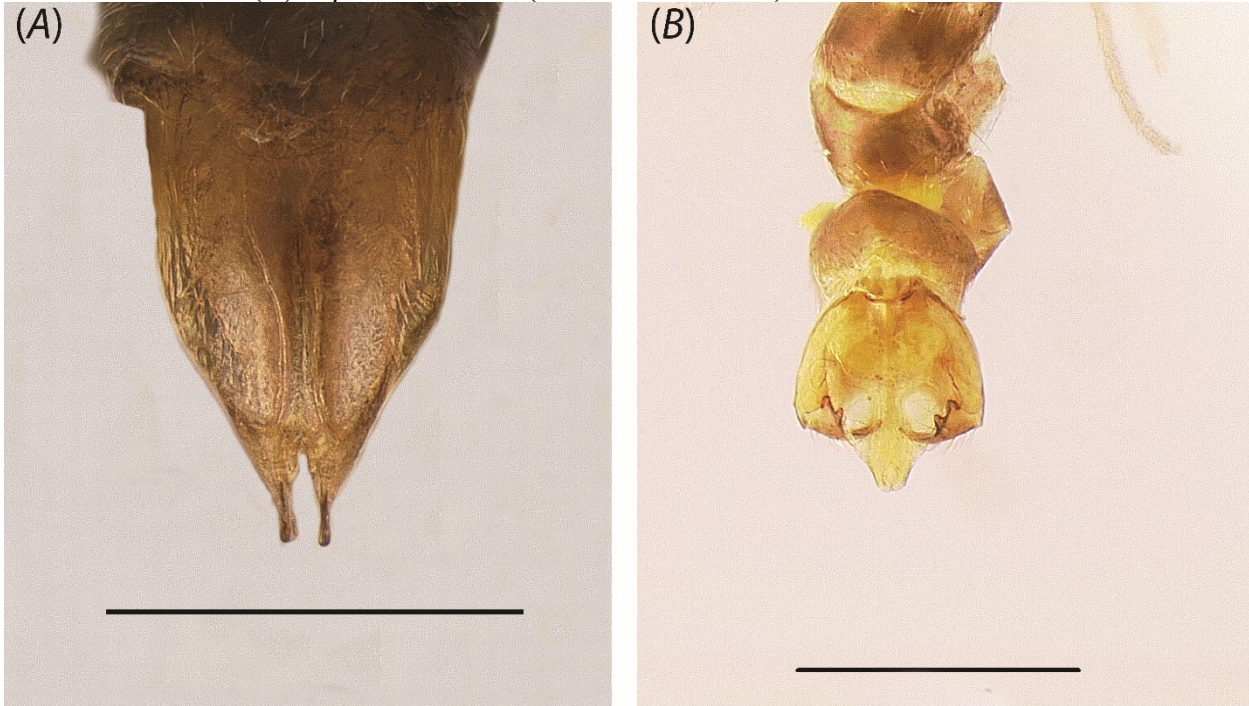

1248

1249

Phylogeny of the Male-Based Ant Genus *Phaulomyrma*

1250 Table 1. Summary statistics for full 9,351-bp DNA legacy-locus alignment. “ – ” = absent base; “  
 1251 ? ” = unknown base.  $\chi^2$  test of nucleotide homogeneity executed with IQ-Tree 1.6.10 (Nguyen *et*  
 1252 *al.* 2015) on the CIPRES Science Gateway (v. 3.3) (Miller *et al.* 2010).

| Taxon                             | Designation in Borowiec <i>et al.</i> (2019) | Caste/Sex | Identifier    | Percent missing | AT content | $\chi^2$ test of nucleotide homogeneity, % <i>p</i> -value | -    | ?    | # of specimens physically examined |
|-----------------------------------|----------------------------------------------|-----------|---------------|-----------------|------------|------------------------------------------------------------|------|------|------------------------------------|
| <i>Anomalomyrma boltoni</i>       | <i>Anomalomyrma boltoni</i>                  | Worker    | CASENT0217032 | 18.682          | 0.526      | 57.33, passed                                              | 1747 | 0    | N/A                                |
| <i>Leptanilla</i> GR01            | <i>Leptanilla</i> GR01                       | Male      | CASENT0106060 | 19.474          | 0.536      | 2.23, failed                                               | 1821 | 0    | 5                                  |
| <i>Leptanilla</i> GR02            | <i>Leptanilla</i> GR02                       | Male      | CASENT0106236 | 18.939          | 0.539      | 0.95, failed                                               | 1771 | 0    | 9                                  |
| <i>Leptanilla</i> GR03            | N/A                                          | Male      | CASENT0106058 | 9.817           | 0.529      | 10.55, passed                                              | 918  | 0    | 9                                  |
| <i>Leptanilla</i> TH01            | <i>Leptanilla</i> TH01                       | Male      | CASENT0119792 | 19.731          | 0.523      | 59.55, passed                                              | 1845 | 0    | 1                                  |
| <i>Yavnella</i> TH02              | <i>Leptanilla</i> TH02                       | Male      | CASENT0119531 | 18.629          | 0.512      | 42.16, passed                                              | 1742 | 0    | 1                                  |
| <i>Yavnella</i> TH03              | <i>Leptanilla</i> TH03                       | Male      | CASENT0129721 | 18.747          | 0.521      | 73.57, passed                                              | 1753 | 0    | 1                                  |
| <i>Yavnella</i> TH04              | <i>Leptanilla</i> TH04                       | Male      | CASENT0129695 | 18.768          | 0.512      | 46.39, passed                                              | 1755 | 0    | 1                                  |
| <i>Yavnella</i> TH05              | <i>Leptanilla</i> TH05                       | Male      | CASENT0134656 | 18.811          | 0.516      | 58.31, passed                                              | 1759 | 0    | 1                                  |
| <i>Yavnella</i> TH06              | <i>Leptanilla</i> TH06                       | Male      | CASENT0179537 | 18.918          | 0.511      | 41.26, passed                                              | 1769 | 0    | 1                                  |
| <i>Yavnella</i> TH08              | <i>Leptanilla</i> TH08                       | Male      | CASENT0227775 | 18.961          | 0.514      | 60.05, passed                                              | 1773 | 0    | 1                                  |
| <i>Leptanilla</i> TH09            | <i>Leptanilla</i> TH09                       | Male      | CASENT0227556 | 18.822          | 0.542      | 0.01, failed                                               | 1760 | 0    | 1                                  |
| <i>Leptanilla</i> ZA01            | <i>Leptanilla</i> ZA01                       | Male      | CASENT0106354 | 18.886          | 0.545      | 0.01, failed                                               | 1766 | 0    | 1                                  |
| <i>Leptanilla</i> zhg-au02        | N/A                                          | Male      | CASENT0758864 | 18.682          | 0.545      | 0.51, failed                                               | 777  | 4920 | 1                                  |
| <i>Leptanilla</i> zhg-th01        | N/A                                          | Male      | CASENT0842614 | 19.474          | 0.552      | 34.54, passed                                              | 518  | 4337 | 2                                  |
| <i>Leptanilla</i> revelierii      | N/A                                          | Worker    | CASENT0842627 | 18.939          | 0.517      | 25.57, passed                                              | 928  | 5217 | 4                                  |
| <i>Leptanilla</i> zhg-bt01        | N/A                                          | Male      | CASENT0842617 | 60.924          | 0.538      | 0.00, failed                                               | 511  | 4337 | 1                                  |
| <i>Leptanilla</i> zhg-my02        | N/A                                          | Male      | CASENT0106451 | 51.92           | 0.532      | 2.89, failed                                               | 1980 | 2133 | 49                                 |
| <i>Leptanilla</i> zhg-my03        | N/A                                          | Male      | CASENT0842618 | 65.715          | 0.526      | 1.04, failed                                               | 1999 | 2133 | 4                                  |
| <i>Leptanilla</i> zhg-my04        | N/A                                          | Male      | CASENT0842553 | 51.845          | 0.518      | 11.36, passed                                              | 1942 | 2452 | 21                                 |
| <i>Leptanilla</i> zhg-my05        | N/A                                          | Male      | CASENT0842568 | 43.985          | 0.474      | 19.01, passed                                              | 1525 | 0    | 7                                  |
| <i>Martialis</i> heureka          | <i>Martialis</i> heureka                     | Worker    | CASENT0106181 | 44.188          | 0.523      | 0.00, failed                                               | 2216 | 3297 | N/A                                |
| <i>Noonilla</i> zhg-my02          | N/A                                          | Male      | CASENT0842599 | 16.308          | 0.477      | 6.76, passed                                               | 1723 | 0    | 12                                 |
| <i>Noonilla</i> zhg-my06          | N/A                                          | Male      | CASENT0106373 | 42.552          | 0.536      | 14.61, passed                                              | 1715 | 0    | 3                                  |
| <i>Opamyrra</i> hungvuong         | <i>Opamyrra</i> hungvuong                    | Worker    | CASENT0178347 | 18.426          | 0.539      | 0.00, failed                                               | 1717 | 0    | N/A                                |
| <i>Yavnella</i> MM01              | <i>Phaulomyrma</i> MM01                      | Male      | CASENT0179537 | 19.014          | 0.514      | 72.37, passed                                              | 1772 | 0    | 1                                  |
| <i>Phaulomyrma</i> javana         | N/A                                          | Male      | MCZ:Ent:31142 | 100             | N/A        | N/A                                                        | N/A  | N/A  | 1                                  |
| <i>Protanilla</i> TH01            | <i>Protanilla</i> TH01                       | Male      | CASENT0119776 | 18.34           | 0.529      | 29.55, passed                                              | 1715 | 0    | 1                                  |
| <i>Protanilla</i> TH02            | <i>Protanilla</i> TH02                       | Male      | CASENT0128922 | 18.362          | 0.529      | 30.49, passed                                              | 1717 | 0    | 1                                  |
| <i>Protanilla</i> TH03            | <i>Protanilla</i> TH03                       | Male      | CASENT0119791 | 18.95           | 0.497      | 0.08, failed                                               | 1772 | 0    | 1                                  |
| <i>Protanilla</i> zhg-vn01        | N/A                                          | Male      | CASENT0842613 | 58.208          | 0.512      | 3.27, failed                                               | 2146 | 3297 | 5                                  |
| <i>Yavnella</i> argamani          | <i>Yavnella</i> argamani                     | Male      | CASENT0235253 | 18.789          | 0.52       | 61.37, passed                                              | 1757 | 0    | 1                                  |
| <i>Yavnella</i> cf. <i>indica</i> | N/A                                          | Male      | CASENT0106375 | 52.989          | 0.502      | 6.42, passed                                               | 2503 | 2452 | 8                                  |
| <i>Yavnella</i> zhg-bt01          | N/A                                          | Male      | CASENT0842616 | 49.054          | 0.514      | 47.75, passed                                              | 2454 | 2133 | 5                                  |



### Phylogeny of the Male-Based Ant Genus *Phaulomyrma*

| <b>Taxon</b>             | <b>Designation in Borowiec <i>et al.</i> (2019)</b> | <b>Caste/Sex</b> | <b>Identifier</b> | <b>Percent missing</b> | <b>AT content</b> | <b><math>\chi^2</math> test of nucleotide homogeneity, % <i>p</i>-value</b> | <b>-</b> | <b>?</b> | <b># of specimens physically examined</b> |
|--------------------------|-----------------------------------------------------|------------------|-------------------|------------------------|-------------------|-----------------------------------------------------------------------------|----------|----------|-------------------------------------------|
| <i>Yavnella</i> zhg-th01 | N/A                                                 | Male             | CASENT0842615     | 51.706                 | 0.522             | 7.42, passed                                                                | 498      | 4337     | 2                                         |

1253

1254

Phylogeny of the Male-Based Ant Genus *Phaulomyrma*

1255 Table 2. NCBI and SRA accession numbers for DNA sequences used in Bayesian total-evidence  
1256 inference.

| Taxon                       | CASENT #      | SRA         | 28S      | AbdA     | EF2      | LwRh     | Wg       | AP        | ArgK     | NaK       | POLD1     | Top1     | Ubx      |
|-----------------------------|---------------|-------------|----------|----------|----------|----------|----------|-----------|----------|-----------|-----------|----------|----------|
| <i>Anomalomyrma boltoni</i> | CASENT0217032 | SRR11742957 | KU671445 | KU672069 | KU671496 | KU671547 | KU671598 | KU671848  | KU671656 | KU672002  | KU671925  | KU671719 | KU671782 |
| <i>Leptanilla GR01</i>      | CASENT0106236 | SRR11881502 | EF012999 | JN967847 | JN967830 | JN967890 | JN967854 | MF625736  | JN967880 | MF626276  | MF625821  | JN967820 | JN967809 |
| <i>Leptanilla GR02</i>      | CASENT0106060 | SRR11881501 | JN967864 | JN967848 | JN967831 | JN967891 | JN967856 | MF625737* | JN967883 | MF626277* | MF625822* | JN967823 | JN967812 |
| <i>Leptanilla GR03</i>      | CASENT0106058 | SRR11793843 | JN967868 | JN967851 | JN967834 | JN967894 | JN967859 | XXXXXXXX  | JN967885 | MT003718  | MT526730  | JN967826 | JN967815 |
| <i>Leptanilla TH01</i>      | CASENT0119792 | SRR11881509 | KU674447 | JN967845 | JN967836 | KU671549 | JN967853 | KU671856  | KU671660 | KU672010  | KU671933  | KU671723 | KU671786 |
| <i>Leptanilla TH09</i>      | CASENT0227556 | N/A         | MF626114 | MF625683 | MF625896 | MF626223 | MF626005 | MF625744  | MF626167 | MF626234  | MF625829  | MF626058 | MF625949 |
| <i>Leptanilla ZA01</i>      | CASENT0106354 | N/A         | AY867452 | AY867468 | EF013432 | AY867483 | AY867421 | MF625745  | JN967878 | MF626285  | MF625830  | JN967818 | JN967807 |
| <i>Leptanilla zbg-au02</i>  | CASENT0758864 | SRR11793848 | N/A      | N/A      | N/A      | N/A      | N/A      | XXXXXXXX  | MT526686 | XXXXXXXX  | XXXXXXXX  | XXXXXXXX | XXXXXXXX |
| <i>Leptanilla zbg-th01</i>  | CASENT0842614 | SRR11793854 | N/A      | N/A      | N/A      | N/A      | N/A      | XXXXXXXX  | MT526687 | XXXXXXXX  | MT526731  | XXXXXXXX | XXXXXXXX |
| <i>Leptanilla revelieri</i> | CASENT0842627 | SRR11881510 | XXXXXXXX | N/A      | N/A      | N/A      | N/A      | XXXXXXXX  | N/A      | MW197678  | MW197679  | XXXXXXXX | XXXXXXXX |
| <i>Leptanilla zbg-th01</i>  | CASENT0842617 | SRR11793849 | XXXXXXXX | N/A      | N/A      | N/A      | N/A      | XXXXXXXX  | MT526684 | XXXXXXXX  | MT526729  | XXXXXXXX | XXXXXXXX |
| <i>Leptanilla zbg-my02</i>  | CASENT0106451 | SRR11793840 | N/A      | N/A      | N/A      | N/A      | N/A      | XXXXXXXX  | MT526688 | XXXXXXXX  | MT526732  | XXXXXXXX | XXXXXXXX |
| <i>Leptanilla zbg-my03</i>  | CASENT0842618 | SRR11793851 | N/A      | N/A      | N/A      | N/A      | N/A      | XXXXXXXX  | XXXXXXXX | XXXXXXXX  | MT526734  | XXXXXXXX | XXXXXXXX |
| <i>Leptanilla zbg-my04</i>  | CASENT0842553 | SRR11793838 | XXXXXXXX | N/A      | N/A      | N/A      | N/A      | XXXXXXXX  | XXXXXXXX | XXXXXXXX  | MT526735  | XXXXXXXX | XXXXXXXX |
| <i>Leptanilla zbg-my05</i>  | CASENT0842568 | SRR11793837 | XXXXXXXX | N/A      | N/A      | N/A      | N/A      | XXXXXXXX  | MT526687 | XXXXXXXX  | MT526733  | XXXXXXXX | XXXXXXXX |
| <i>Martialis heureka</i>    | CASENT0106181 | SRR11881511 | KU671448 | KU672072 | KU671499 | KU671550 | KU671601 | KU671858  | KU671661 | KU672012  | KU671935  | KU671724 | KU671787 |
| <i>Noonilla zbg-my02</i>    | CASENT0842599 | SRR11793856 | XXXXXXXX | N/A      | N/A      | N/A      | N/A      | XXXXXXXX  | XXXXXXXX | XXXXXXXX  | XXXXXXXX  | XXXXXXXX | XXXXXXXX |
| <i>Noonilla zbg-my06</i>    | CASENT0842610 | SRR11793842 | XXXXXXXX | N/A      | N/A      | N/A      | N/A      | XXXXXXXX  | XXXXXXXX | XXXXXXXX  | XXXXXXXX  | XXXXXXXX | XXXXXXXX |
| <i>Opomyrma lungenoesi</i>  | CASENT0178347 | SRR11742960 | KU674407 | KU672031 | KU671458 | KU671509 | KU671560 | KU671806  | KU671616 | KU671960  | KU671883  | KU671679 | KU671742 |
| <i>Proanilla TH01</i>       | CASENT0119776 | SRR12006305 | MF626129 | MF625698 | MF625911 | MF626238 | MF626020 | MF625776  | MF626191 | MF626316  | MF625861  | MF626082 | MF625973 |
| <i>Proanilla TH02</i>       | CASENT0128922 | SRR11742959 | MF626130 | MF625699 | MF625912 | MF626239 | MF626021 | MF625777  | MF626192 | MF626317  | MF625862  | MF626083 | MF625974 |
| <i>Proanilla TH03</i>       | CASENT0119791 | SRR11742954 | MF626131 | MF625700 | MF625913 | MF626240 | MF626022 | MF625778  | MF626193 | MF626318  | MF625863  | MF626084 | MF625975 |
| <i>Yavnella argamani</i>    | CASENT0235253 | SRR11793861 | KU671449 | KU672073 | KU671500 | KU671551 | KU671602 | KU671868  | KU671665 | KU672022  | KU671945  | KU671728 | KU671791 |
| <i>Yavnella et. indica</i>  | CASENT0106375 | SRR11793841 | XXXXXXXX | N/A      | N/A      | N/A      | N/A      | XXXXXXXX  | XXXXXXXX | XXXXXXXX  | XXXXXXXX  | XXXXXXXX | XXXXXXXX |
| <i>Yavnella MM01</i>        | CASENT0179537 | SRR11742953 | MF626120 | MF625689 | MF625902 | MF626229 | MF626011 | MF625762  | MF626178 | MF626302  | MF625847  | MF626089 | MF625960 |
| <i>Yavnella TH02</i>        | CASENT0119531 | SRR11881508 | MF626108 | MF625677 | MF625890 | MF626217 | MF625999 | MF625738  | MF626161 | MF626278  | MF625823  | MF626052 | MF625941 |
| <i>Yavnella TH03</i>        | CASENT0129271 | SRR11742956 | MF626109 | MF625678 | MF625891 | MF626218 | MF626000 | MF625739  | MF626162 | MF626279  | MF625824  | MF626053 | MF625944 |
| <i>Yavnella TH04</i>        | CASENT0129695 | SRR11742958 | MF626110 | MF625679 | MF625892 | MF626219 | MF626001 | MF625740  | MF626163 | MF626280  | MF625825  | MF626054 | MF625945 |
| <i>Yavnella TH05</i>        | CASENT0134656 | SRR11881507 | MF626111 | MF625680 | MF625893 | MF626220 | MF626002 | MF625741  | MF626164 | MF626281  | MF625826  | MF626055 | MF625946 |
| <i>Yavnella TH06</i>        | CASENT0179537 | SRR11742955 | MF626112 | MF625681 | MF625894 | MF626221 | MF626003 | MF625742  | MF626165 | MF626282  | MF625827  | MF626056 | MF625947 |
| <i>Yavnella TH08</i>        | CASENT0227775 | SRR11881506 | MF626113 | MF625682 | MF625895 | MF626222 | MF626004 | MF625743  | MF626166 | MF626283  | MF625828  | MF626057 | MF625948 |
| <i>Yavnella zbg-th01</i>    | CASENT0842616 | SRR11793849 | XXXXXXXX | N/A      | N/A      | N/A      | N/A      | XXXXXXXX  | XXXXXXXX | XXXXXXXX  | XXXXXXXX  | XXXXXXXX | XXXXXXXX |
| <i>Yavnella zbg-th01</i>    | CASENT0842615 | SRR11793853 | XXXXXXXX | N/A      | N/A      | N/A      | N/A      | XXXXXXXX  | XXXXXXXX | XXXXXXXX  | XXXXXXXX  | XXXXXXXX | XXXXXXXX |

1257 \*These accession numbers are erroneously attributed to CASENT0106067 (*Leptanilla GR02*) on  
1258 GenBank.
